# Supplementary material for: Neuro-Genetic Mechanisms Connecting Brain Structure to Breast Cancer
Source: Research Square preprint supplement (doi:10.21203/rs.3.rs-8676570/v1), 2026-01-29
Supplement: Supplementary file 1 [file 340d6e485951d832a2a1c5df.docx]

**Supplementary materials legend**

1. **Supplementary Table 1: Data sources.**
2. **Supplementary Table 2: All Mendelian randomization (MR) results.**
   - β represents the effect estimate of the MR analysis.
   - P represents the P-value (significance) of the MR analysis.
   - fg_BC denotes breast cancer in the FinnGen database.
   - fg_ERplus denotes ER-positive breast cancer in the FinnGen database.
   - fg_ERneg denotes ER-negative breast cancer in the FinnGen database.
   - pb53_luminalA corresponds to the accession GCST90454345.
   - pb53_luminalB corresponds to the accession GCST90454346.
   - pb53_TNBC corresponds to the accession GCST90454344.
   - pb53_HER2rich corresponds to the accession GCST90454348.
   - pb53_BC corresponds to the accession GCST010098.
   - pb14_BC corresponds to the accession GCST90296719.
   - pb14_ERneg corresponds to the accession GCST90296721.
   - pb14_ERplus corresponds to the accession GCST90296720.
   - pb14_TNBC corresponds to the accession GCST90296722.
   - ieu1127_ERplus corresponds to the accession ieu-a-1127.
   - ieu1128_ERneg corresponds to the accession ieu-a-1128.

1. **Supplementary Table 3: Leading significant results for each analysis.**
2. **Supplementary Table 4: Colocalization analysis.**
3. **Supplementary Table 5: Enrichment analysis.**
4. **Supplementary Figure 1. Schematic diagram of gene enrichment analysis.**
