# Supplementary material for: Neuro-Genetic Mechanisms Connecting Brain Structure to Breast Cancer
Source: Research Square preprint supplement (doi:10.21203/rs.3.rs-8676570/v1), 2026-01-29
Supplement: Supplementary file 2 [file 56a578cd5a9cc7d84f6c26af.xlsx]

## Sheet: Supplementary table 1
Supplementary table 1. Summmary of data source
ID	Year	PMID	Trait	Sample_info	Source
GCST90002426-6360	2021	33875891	3935 IDPs	22138	GWAS catalog
-	2015	25607358	8 IDPs	30717	ENIGMA
-	2020	34672763	70 IDPs	51665	ENIGMA
-	2024	-	Malignant neoplasm of breast, excluding all cancers (controls excluding all cancers)	24270(case), 222078(control)	finnGen
-	2024	-	Malignant neoplasm of breast, ER-positive, excluding all cancers (controls excluding all cancers)	14540(case), 221705(control)	finnGen
-	2024	-	Malignant neoplasm of breast, ER-negative, excluding all cancers (controls excluding all cancers)	9724(case), 221705(control)	finnGen
GCST010098	2020	32424353	Breast carcinoma	247173 European 133,384(case),113,789(control)	GWAS catalog
GCST90454345	2020	32424353	Luminal A	148877 European 57,400(case), 91,477(control)	GWAS catalog
GCST90454344	2020	32424353	Triple-negative breast cancer	106377 European 14,900(case), 91,477(control)	GWAS catalog
GCST90454346	2020	32424353	Luminal B	105277 European 13,800(case), 91,477(control)	GWAS catalog
GCST90454348	2020	32424353	HER2-enriched	97877 European 6,400(case), 91,477(control)	GWAS catalog
GCST90296719	2024	38741014	Breast cancer	40138 African American or Afro-Caribbean, Sub-Saharan African, African unspecified 18,034(case),22,104(control)	GWAS catalog
GCST90296720	2024	38741014	Estrogen-receptor positive breast cancer	28328 African American or Afro-Caribbean, Sub-Saharan African, African unspecified 9,304(case), 19,024(control)	GWAS catalog
GCST90296721	2024	38741014	Estrogen-receptor negative breast cancer	21982 African American or Afro-Caribbean, Sub-Saharan African, African unspecified 4,924(case), 17,058(control)	GWAS catalog
GCST90296722	2024	38741014	Triple-negative breast cancer	19122 African American or Afro-Caribbean, Sub-Saharan African, African unspecified 2,860(case), 16,262(control)	GWAS catalog
ieu-a-1127	2017	-	ER+ Breast cancer (Combined Oncoarray; iCOGS; GWAS meta analysis)	175475 European 69,501(case), 105,974(control)	IEU OpenGWAS
ieu-a-1128	2017	-	ER- Breast cancer (Combined Oncoarray; iCOGS; GWAS meta analysis)	127442 European 21,468(case), 105,974(control)	IEU OpenGWAS

## Sheet: Supplementary table 2
Supplementary table 2. Summary of MR results
IDPs	β.fg_BC	P.fg_BC	β.fg_ERneg	P.fg_ERneg	β.fg_ERplus	P.fg_ERplus	β.pb53_luminalA	P.pb53_luminalA	β.pb53_luminalB	P.pb53_luminalB	β.pb53_TNBC	P.pb53_TNBC	β.pb53_HER2rich	P.pb53_HER2rich	β.pb14_BC	P.pb14_BC	β.pb14_ERneg	P.pb14_ERneg	β.pb14_ERplus	P.pb14_ERplus	β.pb14_TNBC	P.pb14_TNBC	β.pb53_BC	P.pb53_BC	β.ieu1127_ERplus	P.ieu1127_ERplus	β.ieu1128_ERneg	P.ieu1128_ERneg	IDP.short.name	IDP.description
GCST90002765	0.0809462	0.0645651	0.139126	0.00330443	0.050487	0.343952	0.0123081	0.69877	0.0798718	0.166441	0.0314865	0.620804	0.193301	0.0211276	0.179554	0.00293874	0.0959567	0.31124	0.261756	0.000434777	0.137861	0.246204	0.0487665	0.0979152	0.0467228	0.158482	0.123737	0.0209562	Brainstem_global_volume_Pons	Volume of Pons in the whole brain generated by subcortical volumetric sub-segmentation of the Brainstem
GCST90003897	-0.144332	0.322689	-0.233936	0.0332441	-0.0682082	0.729628	-0.0120737	0.859834	0.124955	0.323295	0.0182507	0.921772	-0.106847	0.559251	-0.555555	5.19049e-05	-0.590236	0.00633324	-0.573326	0.00077172	-0.650786	0.0207043	-0.0189144	0.765148	0.0556008	0.374435	0.0185174	0.90343	IDP_dMRI_TBSS_FA_Retrolenticular_part_of_internal_capsule_R	Mean FA (fractional anisotropy) in retrolenticular part of internal capsule (right) on FA skeleton (from dMRI data)
GCST90002768	0.130043	0.0178145	0.18652	0.000436913	0.118613	0.10644	0.0142033	0.698897	0.136109	0.0378316	0.0166927	0.819356	0.153143	0.107333	0.217778	0.00438431	0.09855	0.411462	0.304338	0.00113019	0.179233	0.256843	0.082725	0.0715589	0.0474494	0.230378	0.116636	0.0681091	Brainstem_global_volume_Whole-brainstem	Volume of Whole-brainstem in the whole brain generated by subcortical volumetric sub-segmentation of the Brainstem
GCST90002450	0.0340929	0.637037	0.124735	0.213026	-0.016799	0.799473	0.0711556	0.295511	0.0718356	0.457848	0.127266	0.338477	0.237247	0.157733	0.199584	0.0592719	0.0913519	0.616361	0.356423	0.00187975	0.0920716	0.684695	0.0886289	0.109842	0.0969063	0.192756	0.193891	0.100925	IDP_T1_FIRST_brain_stem+4th_ventricle_volume	Volume of brain stem + 4th ventricle (from T1 brain image)
GCST90002859	-0.00260577	0.970363	-0.0122157	0.897676	-0.0565551	0.387035	-0.0739652	0.0771857	-0.00476122	0.955336	-0.0755899	0.485604	-0.119509	0.427794	0.266034	0.00651529	0.212641	0.166549	0.360139	0.00275125	0.173201	0.429035	-0.0730256	0.0475397	-0.0873998	0.0636214	-0.133852	0.0262198	BA-exvivo_rh_volume_V2	Volume of V2 in the right hemisphere generated by parcellation of the white surface using BA_exvivo parcellation
GCST90004544	0.0828909	0.779756	0.0955383	0.756752	0.0800794	0.792215	-0.0133535	0.903828	0.105269	0.661786	0.121661	0.561018	-0.258286	0.461662	-0.585528	0.014494	-0.57363	0.127112	-0.855382	0.00372345	-0.915179	0.0526365	0.0108598	0.93145	0.0585895	0.696214	-0.0194286	0.899738	IDP_dMRI_ProbtrackX_ISOVF_ptr_l	Weighted-mean ISOVF (isotropic or free water volume fraction) in tract left posterior thalamic radiation (from dMRI data)
GCST90004075	-0.0633747	0.720322	0.0904757	0.660382	-0.145496	0.36743	-0.0304472	0.871337	-0.331774	0.161145	0.177797	0.621409	0.163109	0.638891	-0.341805	0.0979589	0.179788	0.579453	-0.690543	0.00757484	-0.165593	0.714687	-0.0250987	0.758141	-0.0561949	0.60969	0.0781769	0.799971	IDP_dMRI_TBSS_L1_Middle_cerebellar_peduncle	Mean L1 in middle cerebellar peduncle on FA (fractional anisotropy) skeleton (from dMRI data)
Mean_parsopercularis_surfavg_20190429_noGC	0.000336701	0.609915	-0.000380382	0.512432	0.000778129	0.336455	0.00042223	0.506311	0.00123843	0.275678	-0.000152879	0.778219	-0.00063745	0.581315	0.00145868	0.0713861	0.000436146	0.732813	0.00265392	0.00758036	0.000937564	0.559402	0.0004583	0.439013	0.000514525	0.42398	8.90978e-05	0.908782	NA	NA
GCST90003129	-0.102084	0.252783	-0.00192642	0.992849	-0.205753	0.0647493	0.173733	0.174689	0.527424	0.00966196	0.283992	0.0276243	0.290504	0.176415	-0.191386	0.31132	0.254296	0.38958	-0.617516	0.00791882	0.172929	0.639583	0.233963	0.0392822	0.0818298	0.466383	0.288195	0.0140218	aparc-Desikan_rh_area_posteriorcingulate	Area of posteriorcingulate in the right hemisphere generated by parcellation of the white surface using Desikan-Killiany parcellation
GCST90002602	0.0947908	0.0451938	0.182525	0.00127823	0.0620256	0.303164	0.0237383	0.559802	0.0996663	0.156214	0.0398729	0.634668	0.165406	0.104688	0.170991	0.0354176	0.0570213	0.657375	0.263982	0.00823444	0.142707	0.38516	0.0642875	0.0974417	0.0604384	0.155494	0.138379	0.059001	aseg_global_volume_Brain-Stem	Volume of Brain-Stem in the whole brain generated by subcortical volumetric segmentation (aseg)
GCST90004484	0.101298	0.543958	0.248069	0.316665	0.0166509	0.919504	0.0403389	0.683866	-0.0852458	0.799468	-0.287078	0.131716	0.157724	0.620501	0.497634	0.0712502	-0.210999	0.718478	0.831168	0.0143835	0.137065	0.909888	0.0523317	0.487147	0.0471704	0.610485	0.0237983	0.866855	IDP_dMRI_TBSS_ISOVF_Corticospinal_tract_L	Mean ISOVF (isotropic or free water volume fraction) in corticospinal tract (left) on FA (fractional anisotropy) skeleton (from dMRI data)
GCST90002865	0.0537043	0.437951	0.164938	0.0642257	-0.0199609	0.799112	-0.0230074	0.58362	0.0135911	0.897535	-0.182698	0.016903	-0.142613	0.229524	0.203178	0.0118698	0.254103	0.0894752	0.237167	0.0182226	0.353623	0.0251171	-0.043818	0.318707	-0.0437058	0.455827	-0.144095	0.0425851	aparc-DKTatlas_lh_volume_cuneus	Volume of cuneus in the left hemisphere generated by parcellation of the white surface using DKT parcellation
GCST90002735	0.100369	0.408415	0.00878373	0.95196	0.175844	0.179738	-0.123965	0.199118	-0.372668	0.0828613	-0.0656917	0.722953	0.184434	0.81494	-0.0597537	0.104277	-0.0271204	0.635138	-0.108409	0.0190472	-0.0138479	0.846558	-0.102073	0.16658	-0.177142	0.0785331	-0.136183	0.693185	ThalamNuclei_lh_volume_LP	Volume of LP in the left hemisphere generated by subcortical volumetric sub-segmentation of the Thalamic Nuclei
GCST90004397	-0.0495343	0.279679	0.00886335	0.8738	-0.0950278	0.100717	0.0363598	0.373673	0.107568	0.165788	-0.0730409	0.164558	-0.0206027	0.815341	-0.174778	0.00486293	-0.165869	0.147076	-0.180389	0.0192031	-0.123576	0.369168	0.0194431	0.593186	0.0319497	0.418107	-0.00604875	0.904539	IDP_dMRI_ProbtrackX_ICVF_slf_r	Weighted-mean ICVF (intra-cellular volume fraction) in tract right superior longitudinal fasciculus (from dMRI data)
GCST90003243	0.113689	0.27953	0.190375	0.108562	0.0595556	0.60362	0.121025	0.133068	0.197019	0.146793	-0.093794	0.471	0.0701901	0.764187	0.269688	0.0628391	0.157702	0.485406	0.408631	0.0210895	0.39812	0.161202	0.107497	0.258069	0.0936872	0.336646	-0.0437335	0.73218	aparc-DKTatlas_lh_area_lateraloccipital	Area of lateraloccipital in the left hemisphere generated by parcellation of the white surface using DKT parcellation
GCST90004393	0.0100714	0.775966	-0.00979414	0.838777	0.0158687	0.713761	-0.023805	0.426255	-0.0262306	0.685308	-0.0600267	0.299385	0.0144711	0.872275	-0.158397	0.0809765	-0.118029	0.343908	-0.24923	0.0220305	-0.161509	0.265455	-0.0374183	0.245062	-0.000945001	0.978849	-0.0216033	0.699691	IDP_dMRI_ProbtrackX_ICVF_ml_r	Weighted-mean ICVF (intra-cellular volume fraction) in tract right medial lemniscus (from dMRI data)
GCST90002495	0.17732	0.227779	0.313186	0.138437	0.0873371	0.62035	0.199537	0.0525941	0.217488	0.330947	0.027811	0.887607	0.365867	0.265215	-0.434288	0.0375244	-0.149577	0.646449	-0.585527	0.0235519	0.268932	0.512066	0.157557	0.0441905	0.11006	0.26244	0.0991647	0.634207	IDP_T1_FAST_ROIs_L_latocc_cortex_inf	Volume of grey matter in Left Lateral Occipital Cortex, inferior division
GCST90002601	0.0150805	0.397818	0.0105073	0.679502	0.0263112	0.172502	0	1	0	1	0	1	0	1	0.0506492	0.149836	0.0335737	0.610232	0.058341	0.0242462	0.0447447	0.544169	-0.026968	0.34139	-0.0337594	0.277488	0.00331779	0.945372	aseg_global_volume_5th-Ventricle	Volume of 5th-Ventricle in the whole brain generated by subcortical volumetric segmentation (aseg)
GCST90003858	-0.0435824	0.436324	-0.100952	0.162349	-0.0102778	0.91302	0.0516423	0.207865	-0.121184	0.132833	-0.118593	0.108289	-0.108001	0.419793	0.0718942	0.329995	-0.187804	0.104702	0.220668	0.0247046	-0.0936312	0.517418	-0.0195109	0.599484	0.0334822	0.424113	-0.112729	0.107996	wg_rh_intensity-contrast_frontalpole	Grey-white contrast in frontalpole in the right hemisphere calculated as a percentage of the mean gray-white matter intensity from Desikan-Killiany parcellation
GCST90002713	0.0276418	0.841574	-0.164868	0.425426	0.156531	0.36473	0.0661368	0.699526	-0.0454993	0.850686	0.108233	0.649643	0.476664	0.178638	-0.333643	0.110097	-0.304582	0.348716	-0.5831	0.0249194	-0.560634	0.166985	0.0307308	0.7233	0.038454	0.829465	-0.0328219	0.835232	ThalamNuclei_lh_volume_LGN	Volume of LGN in the left hemisphere generated by subcortical volumetric sub-segmentation of the Thalamic Nuclei
GCST90003753	0.0250287	0.139831	0.0155653	0.539899	0.0349565	0.0991053	-0.017443	0.809996	0.0993091	0.604647	-0.198311	0.573701	0.114937	0.616588	0.0490859	0.171746	0.028367	0.671323	0.0579986	0.0249204	0.0402855	0.59045	-0.0181443	0.482974	-0.0274584	0.33061	0.000840442	0.98662	aseg_global_intensity_5th-Ventricle	Mean intensity of 5th-Ventricle in the whole brain generated by subcortical volumetric segmentation (aseg)
GCST90003023	0	1	0	1	0	1	-0.00604358	0.974835	0.373987	0.0963504	0.0139546	0.943614	0.258851	0.431055	-0.43532	0.0712208	-0.21723	0.563944	-0.66896	0.0250338	-0.248515	0.596716	-0.0339847	0.794453	-0.00566839	0.960433	-0.0388763	0.792033	aparc-a2009s_rh_volume_G-pariet-inf-Angular	Volume of G-pariet-inf-Angular in the right hemisphere generated by parcellation of the white surface using Destrieux (a2009s) parcellation
GCST90002630	0.0667331	0.506368	0.0741035	0.710331	0.0751704	0.58841	-0.0155364	0.841822	-0.135638	0.466194	-0.0444709	0.804324	-0.091696	0.715454	0.273923	0.0750473	0.269814	0.474454	0.421683	0.0277888	0.259661	0.454072	-0.0696642	0.239382	-0.0488552	0.501587	-0.0612328	0.582966	aseg_lh_number_HolesBeforeFixing	Number of HolesBeforeFixing in the left hemisphere generated by subcortical volumetric segmentation (aseg)
GCST90002675	-0.0529574	0.56005	-0.0717021	0.570059	-0.104447	0.236285	0.0294515	0.643967	0.0297049	0.83084	0.117674	0.502182	0.00491663	0.980656	-0.239312	0.085534	-0.0169488	0.935651	-0.364289	0.0287229	0.122593	0.641269	0.0248718	0.641933	0.0979087	0.137487	0.0320794	0.851126	HippSubfield_lh_volume_presubiculum-body	Volume of presubiculum-body in the left hemisphere generated by subcortical volumetric sub-segmentation of the Hippocampal Subfields
GCST90004142	0.0426023	0.539917	0.00111899	0.990677	0.0812121	0.275909	-0.0256825	0.564936	-0.0308561	0.783177	0.0430881	0.642935	0.238302	0.0544481	0.110188	0.147078	0.00201769	0.988596	0.203907	0.0309203	-0.00496956	0.976873	0.0143722	0.703299	-0.0101215	0.825053	0.0423018	0.41144	IDP_dMRI_TBSS_L2_Posterior_limb_of_internal_capsule_L	Mean L2 in posterior limb of internal capsule (left) on FA (fractional anisotropy) skeleton (from dMRI data)
GCST90004550	-0.146852	0.0786981	-0.0925288	0.459162	-0.175335	0.0926526	0.0313903	0.633153	0.149984	0.666088	0.183686	0.145131	-0.406878	0.129341	-0.162952	0.190029	-0.0619888	0.750267	-0.33224	0.0327891	-0.00281329	0.990791	0.0247749	0.620184	-0.0198744	0.748695	-0.117131	0.249684	IDP_dMRI_ProbtrackX_ISOVF_unc_l	Weighted-mean ISOVF (isotropic or free water volume fraction) in tract left uncinate fasciculus (from dMRI data)
GCST90003985	0.0422854	0.651243	0.0761971	0.52069	0.0154164	0.900516	0.0559246	0.577744	0.200426	0.112421	0.202393	0.0662161	0.0451798	0.80616	0.183292	0.150392	-0.0737107	0.7133	0.3374	0.0337206	0.161831	0.521584	0.0506661	0.463773	0.0417068	0.6359	0.0788672	0.337029	IDP_dMRI_TBSS_MO_External_capsule_L	Mean MO (diffusion tensor mode) in external capsule (left) on FA (fractional anisotropy) skeleton (from dMRI data)
GCST90002427	-0.159598	0.318614	-0.227187	0.256903	-0.113804	0.424084	0.00145674	0.989005	-0.099821	0.602795	0.0289831	0.804921	0.0878824	0.656004	-0.310041	0.0619837	0.146369	0.735163	-0.432711	0.0337922	0.227159	0.590378	-0.0619802	0.329308	-0.0207444	0.809506	-0.0912677	0.29709	IDP_T1_SIENAX_peripheral_grey_unnormalised_volume	Volume of peripheral cortical grey matter (from T1 brain image)
GCST90003898	-0.165958	0.205162	-0.120073	0.292489	-0.184047	0.235569	0.0339112	0.542684	0.133284	0.283502	-0.109906	0.396381	-0.206278	0.251557	-0.291695	0.0296111	-0.194801	0.382032	-0.330134	0.0339618	-0.162576	0.53575	-0.024627	0.722281	0.0144028	0.7939	-0.077401	0.347375	IDP_dMRI_TBSS_FA_Retrolenticular_part_of_internal_capsule_L	Mean FA (fractional anisotropy) in retrolenticular part of internal capsule (left) on FA skeleton (from dMRI data)
GCST90004302	-0.0767694	0.475262	0.0090564	0.951914	-0.136549	0.159756	-0.0670431	0.430699	-0.0526827	0.792105	0.113247	0.288461	0.13839	0.341268	0.291781	0.0611057	0.12647	0.714624	0.403985	0.0345949	0.0662217	0.840404	-0.0548168	0.539305	-0.0690108	0.440242	0.0463751	0.686572	IDP_dMRI_ProbtrackX_L3_atr_l	Weighted-mean L3 in tract left anterior thalamic radiation (from dMRI data)
GCST90003278	0.259342	0.126082	0.272755	0.0348485	0.243447	0.281955	0.138824	0.121368	0.389972	0.00910756	0.0984709	0.446287	0.301813	0.165491	0.429186	0.00287096	0.663374	0.00622138	0.373527	0.0373105	0.679033	0.0253203	0.164293	0.0838409	0.186683	0.0618063	0.222987	0.027986	aparc-DKTatlas_rh_area_middletemporal	Area of middletemporal in the right hemisphere generated by parcellation of the white surface using DKT parcellation
GCST90004338	0.0113822	0.827553	0.00303761	0.954081	0.0173138	0.778822	0.0562	0.0719223	0.0477431	0.500097	-0.0625429	0.245689	-0.00302099	0.976462	-0.143283	0.0697605	-0.173706	0.234814	-0.178941	0.0378284	-0.189734	0.166651	0.0153897	0.561016	0.0346211	0.302895	-0.0231876	0.567016	IDP_dMRI_TBSS_ICVF_Inferior_cerebellar_peduncle_L	Mean ICVF (intra-cellular volume fraction) in inferior cerebellar peduncle (left) on FA (fractional anisotropy) skeleton (from dMRI data)
GCST90004093	0.049868	0.581202	0.161988	0.230847	-0.0293133	0.795003	0.0446701	0.774408	-0.132199	0.401396	0.0186935	0.890987	0.0621394	0.786112	-0.339431	0.081352	0.160257	0.580221	-0.468662	0.0406068	0.165914	0.648468	-0.00886922	0.907458	-0.00423119	0.949336	-0.126688	0.211842	IDP_dMRI_TBSS_L1_Posterior_limb_of_internal_capsule_R	Mean L1 in posterior limb of internal capsule (right) on FA (fractional anisotropy) skeleton (from dMRI data)
GCST90002543	0.106757	0.337977	0.211634	0.165134	0.0358572	0.752255	0.0805932	0.256599	-0.019378	0.887389	-0.19158	0.28294	0.00722907	0.978527	0.211085	0.147386	0.126446	0.580395	0.367238	0.0419066	0.515135	0.0712867	0.0711394	0.405745	0.0396408	0.557825	-0.0898777	0.523345	IDP_T1_FAST_ROIs_L_supracalc_cortex	Volume of grey matter in Left Supracalcarine Cortex
GCST90002565	0.0945647	0.228921	0.00396077	0.979387	0.160164	0.0971431	-0.0176071	0.80422	0.236268	0.0440834	0.128188	0.209571	-0.100685	0.559774	0.149583	0.303172	-0.145825	0.543753	0.35642	0.0419203	-0.171576	0.66245	0.0225486	0.723146	0.0246908	0.636858	0.083503	0.343891	IDP_T1_FAST_ROIs_R_cerebellum_V	Volume of grey matter in Right V Cerebellum
GCST90003121	0.125994	0.757949	0.316088	0.12425	-0.00193418	0.996922	0.0927625	0.642398	0.569261	0.0153616	0.155967	0.393695	0.393833	0.3303	0.502546	0.00842169	0.942795	0.00186764	0.486986	0.0421433	1.12119	0.00317504	0.158701	0.469437	0.167805	0.463102	0.220903	0.365558	aparc-Desikan_rh_area_middletemporal	Area of middletemporal in the right hemisphere generated by parcellation of the white surface using Desikan-Killiany parcellation
GCST90004401	-0.0140042	0.680632	-0.0578588	0.255885	0.00786717	0.853117	0.0492325	0.18375	0.0832855	0.176043	-0.0183035	0.764264	0.0317443	0.720784	-0.215143	0.0206293	-0.110182	0.530938	-0.196834	0.0445435	-0.138168	0.523603	0.0288993	0.301734	0.0434164	0.18939	0.00808611	0.864625	IDP_dMRI_ProbtrackX_ICVF_unc_r	Weighted-mean ICVF (intra-cellular volume fraction) in tract right uncinate fasciculus (from dMRI data)
GCST90003783	-0.0972658	0.130985	-0.1442	0.125357	-0.0650241	0.495799	-0.0461073	0.377336	0.0319734	0.729451	-0.0541935	0.481197	0.0204149	0.876413	0.0327512	0.708007	0.261491	0.0670791	-0.215521	0.045869	0.170421	0.428655	-0.045165	0.331258	-0.0361218	0.459739	-0.0320762	0.612326	aseg_rh_intensity_Caudate	Mean intensity of Caudate in the right hemisphere generated by subcortical volumetric segmentation (aseg)
Mean_bankssts_surfavg_20190429_noGC	0.000636168	0.62395	-1.04113e-05	0.991836	0.00105856	0.468692	0.00127615	0.163071	0.00271947	0.0500798	-0.000341697	0.767872	0.0013549	0.521881	0.00136592	0.322043	-0.000792274	0.714573	0.00360228	0.0472499	0.00147206	0.587696	0.00107351	0.271662	0.00129787	0.237598	0.00170852	0.17021	NA	NA
GCST90004144	0.109471	0.338782	0.142907	0.0813511	0.0783909	0.591212	-0.052038	0.264288	-0.135312	0.19314	0.172257	0.140079	0.206423	0.169391	0.293213	0.0270824	0.24566	0.321541	0.289403	0.0475801	0.107226	0.70746	0.0101391	0.85331	-0.0378578	0.4349	0.095303	0.154908	IDP_dMRI_TBSS_L2_Retrolenticular_part_of_internal_capsule_L	Mean L2 in retrolenticular part of internal capsule (left) on FA (fractional anisotropy) skeleton (from dMRI data)
GCST90002564	-0.0203611	0.889904	-0.026234	0.867907	0.015446	0.917192	-0.0489963	0.516045	0.21227	0.0515859	0.122959	0.194229	-0.0613595	0.701551	0.135314	0.341603	0.0684436	0.842965	0.329054	0.0476142	-0.114979	0.785271	0.0170321	0.741861	0.0288699	0.558768	0.0720699	0.382559	IDP_T1_FAST_ROIs_L_cerebellum_V	Volume of grey matter in Left V Cerebellum
GCST90002864	0.0910179	0.420698	-0.0658818	0.696931	0.207454	0.141587	-0.0405295	0.765894	0.00583254	0.983311	-0.271214	0.148234	-0.564962	0.0528584	0.516393	0.0219837	0.388941	0.275255	0.570803	0.0491139	0.427591	0.338806	-0.0269429	0.750995	0.0424892	0.678877	-0.176253	0.503303	aparc-DKTatlas_lh_volume_caudalmiddlefrontal	Volume of caudalmiddlefrontal in the left hemisphere generated by parcellation of the white surface using DKT parcellation
GCST90002672	-0.115415	0.424062	-0.0211378	0.897396	-0.163286	0.229042	0.0462846	0.694655	-0.00259382	0.990017	-0.235982	0.131294	-0.0624222	0.810675	0.529996	0.0899576	0.896918	0.218194	0.62924	0.0494516	0.808941	0.381343	-0.051381	0.610538	0	1	0	1	HippSubfield_lh_volume_hippocampal-fissure	Volume of hippocampal-fissure in the left hemisphere generated by subcortical volumetric sub-segmentation of the Hippocampal Subfields
GCST90003178	0.0893571	0.193463	0.150296	0.067414	0.0496621	0.495828	0.0699259	0.360734	0.143154	0.121093	0.0273128	0.77929	0.0183857	0.917599	0.114853	0.228053	0.0429561	0.77378	0.231165	0.0496695	0.0800367	0.669359	0.0652147	0.341153	-0.0224109	0.713659	-0.0760834	0.305699	aparc-pial_rh_area_cuneus	Area of cuneus in the right hemisphere generated by parcellation of the pial surface using Desikan-Killiany parcellation
GCST90004112	-0.0812711	0.227778	0.0274663	0.78528	-0.154163	0.0670893	-0.0926087	0.101831	-0.229438	0.0690594	0.195767	0.0699681	0.128115	0.481245	0.291935	0.0831849	0.249604	0.4381	0.404339	0.0498422	0.269756	0.434054	-0.0482035	0.463791	-0.0710673	0.365259	0.137214	0.0892459	IDP_dMRI_TBSS_L1_Cingulum_hippocampus_L	Mean L1 in cingulum hippocampus (left) on FA (fractional anisotropy) skeleton (from dMRI data)
GCST90003960	-0.023149	0.763977	0.0707183	0.581263	-0.0968721	0.313684	-0.0270743	0.658581	-0.0774226	0.694333	-0.0989274	0.397437	-0.251301	0.312207	0.157703	0.288133	-0.147939	0.525205	0.355719	0.0512478	-0.180376	0.537909	-0.0441679	0.345416	-0.0886738	0.197145	-0.237869	0.00723541	IDP_dMRI_TBSS_MO_Medial_lemniscus_R	Mean MO (diffusion tensor mode) in medial lemniscus (right) on FA (fractional anisotropy) skeleton (from dMRI data)
GCST90006345	0.378363	0.00629594	0.195829	0.346221	0.50819	0.00328699	0.0261672	0.808581	-0.321121	0.178487	0.347895	0.0900547	0.302497	0.375834	-0.632524	0.109927	-0.475009	0.340856	-0.735811	0.0523824	0.452578	0.546994	0.0994982	0.423575	0	1	0	1	QC_T1-to-standard_linear_alignment_discrepancy	Discrepancy between the T1 brain image (linearly-aligned to standard space) and the standard-space brain template
GCST90004071	-0.0227383	0.667409	0.0855865	0.355438	-0.101724	0.123855	-0.0489187	0.410565	-0.129033	0.19721	0.180518	0.0437669	-0.132709	0.468951	0.202911	0.146884	-0.0114653	0.946777	0.259685	0.0535264	-0.053797	0.803482	-0.0455499	0.330525	-0.06631	0.17624	0.0143624	0.837854	IDP_dMRI_TBSS_MD_Uncinate_fasciculus_R	Mean MD (mean diffusivity) in uncinate fasciculus (right) on FA (fractional anisotropy) skeleton (from dMRI data)
GCST90002772	0.0802482	0.127425	0.190042	0.00758263	0.00656567	0.907008	-0.00208179	0.955977	-0.0033835	0.969067	-0.0971272	0.140243	-0.0413797	0.778088	0.143351	0.0765263	0.174326	0.1694	0.192687	0.0544114	0.240057	0.132219	-0.0270322	0.428782	-0.0119232	0.802854	-0.0733106	0.169701	aparc-Desikan_lh_volume_cuneus	Volume of cuneus in the left hemisphere generated by parcellation of the white surface using Desikan-Killiany parcellation
GCST90002638	-0.0387662	0.739271	-0.0797494	0.645552	-0.0408247	0.678259	0.0155631	0.802473	-0.0747036	0.462916	0.0918739	0.35403	0.280463	0.0582281	-0.374442	0.00348531	-0.162789	0.423707	-0.301058	0.0591923	0.055084	0.828588	0.0440469	0.248528	0.00142627	0.978472	0.0914797	0.26044	aseg_rh_volume_Caudate	Volume of Caudate in the right hemisphere generated by subcortical volumetric segmentation (aseg)
GCST90003095	-0.0682596	0.757723	-0.140604	0.67415	-0.0137582	0.924935	0.0626622	0.556033	0.453651	0.0524594	0.164615	0.547406	-0.251845	0.648673	0.261069	0.178484	-0.1698	0.537226	0.499815	0.0610656	-0.337022	0.328091	0.15052	0.0610699	0.191289	0.0542069	0.305524	0.0409991	aparc-Desikan_lh_area_posteriorcingulate	Area of posteriorcingulate in the left hemisphere generated by parcellation of the white surface using Desikan-Killiany parcellation
GCST90002893	-0.0755796	0.552107	-0.194388	0.218609	-0.00300469	0.977685	0.110962	0.281249	0.0376644	0.878121	-0.0229752	0.857465	0.0450529	0.832846	0.311666	0.0897435	0.910995	0.00150039	0.437008	0.0640935	0.784449	0.0294862	0.0657169	0.305162	0.0839658	0.460657	0.0639312	0.504286	aparc-DKTatlas_lh_volume_insula	Volume of insula in the left hemisphere generated by parcellation of the white surface using DKT parcellation
GCST90003578	0.0706403	0.695044	0.155374	0.770463	0.0216117	0.963277	-0.342788	0.0189058	-0.569589	0.00252323	-0.307678	0.0500761	0.021792	0.962699	-0.164151	0.270564	-0.141874	0.543941	-0.341322	0.0666825	0.24182	0.408076	-0.298843	0.115401	-0.332095	0.0832995	-0.186085	0.330839	aparc-DKTatlas_rh_thickness_inferiortemporal	Mean thickness of inferiortemporal in the right hemisphere generated by parcellation of the white surface using DKT parcellation
GCST90003259	-0.0404103	0.818746	-0.290963	0.0458221	0.128231	0.600252	0.00328775	0.978128	-0.386936	0.225909	0.144514	0.35452	0.776312	0.0253133	0.238917	0.132019	0.140988	0.569968	0.359754	0.0668024	-0.0298523	0.923379	-0.00667022	0.939839	0.0359324	0.75156	0.234572	0.335101	aparc-DKTatlas_lh_area_rostralmiddlefrontal	Area of rostralmiddlefrontal in the left hemisphere generated by parcellation of the white surface using DKT parcellation
GCST90003318	0.109025	0.0427234	0.172948	0.0317547	0.0668482	0.319362	0.0541836	0.433611	0.231514	0.0137229	-0.0380761	0.698701	0.0451663	0.750509	0.204697	0.113849	0.265527	0.262141	0.23515	0.0703675	0.421443	0.0474708	0.0584977	0.328045	0.0650612	0.329406	0.0600462	0.358722	aparc-a2009s_lh_area_G-oc-temp-med-Lingual	Area of G-oc-temp-med-Lingual in the left hemisphere generated by parcellation of the white surface using Destrieux (a2009s) parcellation
GCST90003353	0.249009	0.00587807	0.268289	0.109354	0.250478	0.0322607	0.061628	0.407386	0.101317	0.588219	-0.281996	0.163498	0.0306207	0.898835	0.163554	0.386157	-0.325573	0.270774	0.417041	0.0727136	-0.0702853	0.850128	0.0833271	0.139992	0.108486	0.118534	-0.0833368	0.472697	aparc-a2009s_lh_area_S-oc-middle+Lunatus	Area of S-oc-middle+Lunatus in the left hemisphere generated by parcellation of the white surface using Destrieux (a2009s) parcellation
GCST90003589	-0.355224	0.0044415	-0.519318	0.00549809	-0.245064	0.115966	-0.295604	0.00385975	-0.584244	0.0091411	0.203953	0.586391	-0.222782	0.495866	0.543756	0.0212584	0.788508	0.0356224	0.551905	0.0735452	0.857689	0.0692396	-0.219129	0.00477483	-0.340714	0.000395434	-0.106151	0.470732	aparc-DKTatlas_rh_thickness_parstriangularis	Mean thickness of parstriangularis in the right hemisphere generated by parcellation of the white surface using DKT parcellation
GCST90003953	0.0226779	0.482126	0.0249632	0.604943	0.0239542	0.625067	-0.0127799	0.592254	-0.0105972	0.86244	-0.0289611	0.524969	-0.00936656	0.911825	0.0493531	0.398581	0.00566917	0.950554	0.127624	0.074065	-0.0695256	0.564742	-0.0220096	0.225677	-0.0564475	0.029123	-0.0266325	0.445573	IDP_dMRI_TBSS_MO_Pontine_crossing_tract	Mean MO (diffusion tensor mode) in pontine crossing tract on FA (fractional anisotropy) skeleton (from dMRI data)
GCST90004090	0.0486428	0.520523	0.213984	0.0588528	-0.073484	0.452365	0.00650867	0.926624	-0.0867526	0.522402	-0.198107	0.0405675	0.103908	0.523983	-0.240432	0.0902038	-0.0284156	0.901738	-0.310515	0.0764658	0.120293	0.667277	-0.00715765	0.852456	0.0144149	0.763034	-0.142112	0.10656	IDP_dMRI_TBSS_L1_Cerebral_peduncle_L	Mean L1 in cerebral peduncle (left) on FA (fractional anisotropy) skeleton (from dMRI data)
GCST90004056	0.0118637	0.884816	0.0934795	0.190512	-0.0467945	0.62048	-0.00772141	0.896854	-0.138193	0.125956	0.180899	0.0176829	0.325427	0.00970685	0.166642	0.0837034	0.29613	0.104805	0.194912	0.0778498	0.332024	0.186459	-0.00578337	0.902444	-0.0212973	0.720623	0.134199	0.0243486	IDP_dMRI_TBSS_MD_Posterior_thalamic_radiation_L	Mean MD (mean diffusivity) in posterior thalamic radiation (left) on FA (fractional anisotropy) skeleton (from dMRI data)
GCST90003587	0.0709112	0.619969	0.0153559	0.942728	0.135668	0.447	-0.175931	0.100433	-0.588296	0.0122252	-0.590347	0.00361991	0.269905	0.438379	-0.185411	0.237264	-0.147137	0.550352	-0.342944	0.080138	0.091415	0.792402	-0.169291	0.0810038	-0.207201	0.0421333	-0.156013	0.314376	aparc-DKTatlas_rh_thickness_parsopercularis	Mean thickness of parsopercularis in the right hemisphere generated by parcellation of the white surface using DKT parcellation
GCST90003069	-0.192292	0.0485594	-0.307385	0.130894	-0.124208	0.306886	-0.0343668	0.672123	-0.000305647	0.99865	0.346724	0.175024	-0.019227	0.941552	-0.311264	0.197771	-0.231628	0.540874	-0.515949	0.0821747	-0.683474	0.153366	-0.0607494	0.427092	-0.0693462	0.359926	0.124468	0.456891	aparc-a2009s_rh_volume_S-subparietal	Volume of S-subparietal in the right hemisphere generated by parcellation of the white surface using Destrieux (a2009s) parcellation
GCST90002581	0.0129079	0.905496	-0.0346787	0.841678	0.0582588	0.652068	-0.0278417	0.690551	-0.0118018	0.915992	0.0124745	0.904156	-0.10928	0.472472	0.366687	0.0274481	0.409789	0.115541	0.332166	0.0890881	0.24954	0.609027	-0.00964976	0.873341	-0.0376645	0.562576	-0.0358466	0.596979	IDP_T1_FAST_ROIs_L_cerebellum_VIIIb	Volume of grey matter in Left VIIIb Cerebellum
GCST90004382	0.050972	0.421585	0.023289	0.824294	0.0700902	0.182028	0.0749321	0.0334846	0.0730127	0.475954	-0.0897904	0.234574	-0.0146364	0.923527	-0.177471	0.106492	-0.0677383	0.661869	-0.203494	0.0896551	-0.0970218	0.662834	0.0401625	0.248209	0.06562	0.130222	0.036033	0.508707	IDP_dMRI_ProbtrackX_ICVF_cgh_r	Weighted-mean ICVF (intra-cellular volume fraction) in tract right parahippocampal part of cingulum (from dMRI data)
GCST90003767	-0.0924333	0.21554	-0.0618307	0.726476	-0.123124	0.217629	-0.00696185	0.882791	0.0588973	0.717342	-0.136527	0.129979	0.0586147	0.700853	0.0213708	0.907667	0.424147	0.277378	-0.359926	0.089764	0.780392	0.0356792	-0.0322076	0.369446	-0.013304	0.76492	-0.0678228	0.31681	aseg_lh_intensity_Cerebellum-Cortex	Mean intensity of Cerebellum-Cortex in the left hemisphere generated by subcortical volumetric segmentation (aseg)
GCST90004506	-0.189689	0.047303	-0.301295	0.0352679	-0.120745	0.383127	0.059101	0.340927	0.077364	0.659796	0.32386	0.00652016	-0.129175	0.652334	-0.263666	0.077779	-0.07933	0.733612	-0.446015	0.0908534	-0.0320291	0.912314	0.0844973	0.0736929	-0.0355949	0.543837	0.0986172	0.42987	IDP_dMRI_TBSS_ISOVF_Posterior_thalamic_radiation_L	Mean ISOVF (isotropic or free water volume fraction) in posterior thalamic radiation (left) on FA (fractional anisotropy) skeleton (from dMRI data)
GCST90004339	0.0277683	0.475678	0.0146074	0.804243	0.0360193	0.458493	0.0138173	0.673734	0.0047813	0.945606	-0.120961	0.0462343	0.0664903	0.600915	-0.11876	0.251522	0.0430186	0.7857	-0.181326	0.0916482	0.0126795	0.939718	-0.0185859	0.5426	-0.00630652	0.846117	-0.0502049	0.338551	IDP_dMRI_TBSS_ICVF_Superior_cerebellar_peduncle_R	Mean ICVF (intra-cellular volume fraction) in superior cerebellar peduncle (right) on FA (fractional anisotropy) skeleton (from dMRI data)
GCST90004271	-0.0512985	0.340759	0.0226718	0.778407	-0.0990308	0.140805	-0.0226658	0.601873	-0.0506571	0.739984	0.144765	0.0812795	-0.408658	0.032091	-0.110497	0.363679	0.0138821	0.942177	-0.26207	0.092011	0.134528	0.57678	-0.0252767	0.442419	-0.0278402	0.495453	-0.107019	0.21118	IDP_dMRI_ProbtrackX_L1_unc_l	Weighted-mean L1 in tract left uncinate fasciculus (from dMRI data)
GCST90004493	0.0823008	0.400595	0.0819028	0.575835	0.104327	0.393336	-0.00325301	0.973609	-0.0122559	0.968633	-0.0943038	0.695386	0.278924	0.296317	0.38429	0.029892	0.330335	0.233835	0.36168	0.0984919	0.342182	0.32377	0.0158048	0.823375	-0.00630035	0.957207	-0.0682212	0.776355	IDP_dMRI_TBSS_ISOVF_Anterior_limb_of_internal_capsule_R	Mean ISOVF (isotropic or free water volume fraction) in anterior limb of internal capsule (right) on FA (fractional anisotropy) skeleton (from dMRI da
GCST90003479	0.0538966	0.679461	0.15778	0.552334	0.00365996	0.987905	-0.264586	0.00908641	-0.655226	0.00026353	-0.381609	0.00437347	0.0374857	0.905081	-0.203179	0.18753	-0.178489	0.460246	-0.3162	0.0988765	0.16225	0.59236	-0.273194	0.0252306	-0.296676	0.0122747	-0.183002	0.168472	aparc-Desikan_rh_thickness_GlobalMeanThickness	Mean thickness of GlobalMeanMean thickness in the right hemisphere generated by parcellation of the white surface using Desikan-Killiany parcellation
GCST90003902	0.205268	0.165369	0.0681013	0.758594	0.32194	0.0817967	0.096182	0.444935	0.182724	0.669747	0.199444	0.341971	0.0721776	0.870195	-0.762837	0.0193625	-1.1247	0.0134162	-0.587983	0.0996317	-1.00591	0.0773129	0.114385	0.377941	0	1	0	1	IDP_dMRI_TBSS_FA_Superior_corona_radiata_L	Mean FA (fractional anisotropy) in superior corona radiata (left) on FA skeleton (from dMRI data)
GCST90004197	0	1	0	1	0	1	-0.0918588	0.30405	-0.175339	0.587945	-0.0102758	0.952293	0.162779	0.572437	0.489566	0.0238266	0.844277	0.0130256	0.438584	0.102108	0.886706	0.0373387	-0.116658	0.119566	-0.154811	0.0652776	-0.00297413	0.98143	IDP_dMRI_TBSS_L3_Posterior_corona_radiata_R	Mean L3 in posterior corona radiata (right) on FA (fractional anisotropy) skeleton (from dMRI data)
GCST90003966	-0.027855	0.777404	0.232677	0.114489	-0.217078	0.0776217	-0.020766	0.825035	-0.32506	0.0185188	-0.101733	0.397747	0.238682	0.244158	-0.451595	0.0756841	-0.318206	0.426012	-0.487452	0.105793	-0.12402	0.80956	-0.0370654	0.506749	-0.0532592	0.37154	-0.0312015	0.730704	IDP_dMRI_TBSS_MO_Cerebral_peduncle_R	Mean MO (diffusion tensor mode) in cerebral peduncle (right) on FA (fractional anisotropy) skeleton (from dMRI data)
GCST90003509	-0.163444	0.318611	-0.215467	0.245499	-0.110833	0.48829	-0.133482	0.442191	-0.346557	0.402682	-0.074116	0.702225	-0.0235798	0.942331	0.422193	0.0361846	0.757295	0.0173892	0.402323	0.108602	0.838719	0.0353737	0.00596555	0.979616	-0.0507873	0.872248	-0.0914304	0.527848	aparc-Desikan_rh_thickness_supramarginal	Mean thickness of supramarginal in the right hemisphere generated by parcellation of the white surface using Desikan-Killiany parcellation
GCST90004381	0.0240568	0.647853	0.00373891	0.958462	0.0422693	0.462988	0.0614728	0.0490359	0.0839877	0.386977	-0.0746303	0.210931	-0.00190263	0.989119	-0.113824	0.196512	0.0186094	0.884778	-0.159819	0.111204	0.0890906	0.596311	0.0333001	0.211654	0.0637649	0.0295625	0.00820332	0.877169	IDP_dMRI_ProbtrackX_ICVF_cgh_l	Weighted-mean ICVF (intra-cellular volume fraction) in tract left parahippocampal part of cingulum (from dMRI data)
GCST90004437	-0.235928	0.0740366	-0.183778	0.35219	-0.290116	0.0784269	0.0131441	0.897456	0.100413	0.749087	0.499389	0.0101478	-0.115991	0.723795	-0.35574	0.0615581	-0.38591	0.196611	-0.375441	0.113478	-0.110768	0.765973	0.0537507	0.487531	-0.0388563	0.686281	0.325192	0.0620021	IDP_dMRI_TBSS_OD_Cingulum_cingulate_gyrus_L	Mean OD (orientation dispersion index) in cingulum cingulate gyrus (left) on FA (fractional anisotropy) skeleton (from dMRI data)
GCST90004111	-0.087457	0.290356	0.0204225	0.868957	-0.164248	0.112076	-0.137892	0.0327657	-0.0618318	0.665454	0.0800982	0.664625	-0.259265	0.483071	0.518166	0.0982183	0.123003	0.766814	0.539175	0.116291	0.155545	0.735213	-0.117304	0.0512184	-0.108977	0.164922	-0.113954	0.577659	IDP_dMRI_TBSS_L1_Cingulum_hippocampus_R	Mean L1 in cingulum hippocampus (right) on FA (fractional anisotropy) skeleton (from dMRI data)
GCST90004378	0.0117641	0.815932	-0.0274969	0.68732	0.0391827	0.49488	0.0698537	0.034621	0.11829	0.12036	-0.0974881	0.101	-0.0720603	0.42004	-0.103374	0.11134	-0.102201	0.316039	-0.124399	0.122441	-0.183416	0.188132	0.045027	0.217589	0.0696898	0.14097	-0.017467	0.717838	IDP_dMRI_ProbtrackX_ICVF_atr_r	Weighted-mean ICVF (intra-cellular volume fraction) in tract right anterior thalamic radiation (from dMRI data)
GCST90003809	0.0802295	0.111853	0.0181142	0.791113	0.110718	0.077156	0.053901	0.235005	-0.0958991	0.167836	-0.089881	0.250029	0.0226906	0.842339	0.0336532	0.651054	-0.261704	0.024946	0.167429	0.125476	-0.197179	0.230816	0.00650872	0.870865	0.036085	0.366583	-0.0354392	0.580457	wg_lh_intensity-contrast_parsopercularis	Grey-white contrast in parsopercularis in the left hemisphere calculated as a percentage of the mean gray-white matter intensity from Desikan-Killiany parcellation
GCST90003083	0.189046	0.00560173	0.252726	0.0131772	0.151581	0.074552	0.11923	0.148306	0.231735	0.0617171	-0.0942358	0.474753	0.133052	0.554016	0.0658783	0.687315	-0.281806	0.268497	0.303959	0.12862	-0.247021	0.496251	0.134386	0.108621	0.134661	0.0955244	-0.00071201	0.994716	aparc-Desikan_lh_area_lateraloccipital	Area of lateraloccipital in the left hemisphere generated by parcellation of the white surface using Desikan-Killiany parcellation
Mean_entorhinal_surfavg_20190429_noGC	0.000254995	0.912781	-0.00153096	0.71342	-6.81413e-05	0.975801	0.00298104	0.0114209	-0.000764345	0.865495	0.00323748	0.155282	-0.00146749	0.669125	-0.0043845	0.148978	-0.000662436	0.919018	-0.0046962	0.129172	-0.00316395	0.576994	-0.000504767	0.901215	0.00264664	0.0150743	0.00257087	0.152894	NA	NA
GCST90004375	-0.0225987	0.514575	-0.0371288	0.406771	-0.0169317	0.693296	0.0506909	0.159012	0.145433	0.0257846	-0.0422521	0.418804	-0.0455296	0.580581	-0.0875151	0.194562	-0.0648733	0.597591	-0.117329	0.129547	-0.0437813	0.747729	0.0334452	0.28559	0.0525317	0.120853	-0.00281443	0.94396	IDP_dMRI_ProbtrackX_ICVF_ar_l	Weighted-mean ICVF (intra-cellular volume fraction) in tract left acoustic radiation (from dMRI data)
GCST90004143	0.0779993	0.47484	0.174982	0.0319761	-0.000405313	0.997714	-0.00272386	0.96626	-0.011538	0.929445	0.15828	0.140465	0.176819	0.239101	0.144906	0.318213	0.218576	0.217431	0.220373	0.129588	0.296433	0.177557	0.0184942	0.723151	-0.0372299	0.50973	0.081576	0.221243	IDP_dMRI_TBSS_L2_Retrolenticular_part_of_internal_capsule_R	Mean L2 in retrolenticular part of internal capsule (right) on FA (fractional anisotropy) skeleton (from dMRI data)
GCST90002733	0.173447	0.124437	-0.0250009	0.882513	0.301781	0.0321623	0.190619	0.188429	0.157158	0.558773	-0.127016	0.379646	0.351314	0.142493	0.363043	0.136464	-0.0884844	0.819447	0.447482	0.130438	-0.595812	0.221466	0.22851	0.0651187	0.16628	0.331668	0.136872	0.207157	ThalamNuclei_lh_volume_Pc	Volume of Pc in the left hemisphere generated by subcortical volumetric sub-segmentation of the Thalamic Nuclei
GCST90002767	0.191517	0.000204918	0.203124	0.0421516	0.19397	0.00258156	0.0582021	0.184198	0.093564	0.354044	-0.0687209	0.53408	0.257638	0.0744461	0.277952	0.0433933	0.352636	0.0506476	0.252441	0.130645	0.226286	0.317093	0.0762256	0.0224727	0.0130974	0.751755	0.0529701	0.517566	Brainstem_global_volume_Midbrain	Volume of Midbrain in the whole brain generated by subcortical volumetric sub-segmentation of the Brainstem
GCST90004258	-0.0931124	0.23409	-0.0783927	0.382819	-0.112097	0.207728	-0.159347	0.0375591	-0.209229	0.219601	0.0621207	0.518095	-0.117732	0.617663	0.154034	0.374576	0.0302899	0.869981	0.240952	0.133808	5.02164e-05	0.999828	-0.143471	0.100784	-0.171159	0.108179	-0.131621	0.248511	IDP_dMRI_ProbtrackX_L1_ifo_l	Weighted-mean L1 in tract left inferior fronto-occipital fasciculus (from dMRI data)
GCST90004297	-0.0764616	0.277614	-0.0521611	0.645613	-0.0960165	0.233438	-0.080331	0.173664	-0.153483	0.307636	0.13836	0.234151	0.0801451	0.611594	0.277034	0.0377783	0.470479	0.0259727	0.246291	0.133834	0.451684	0.0863983	-0.0571156	0.129637	-0.0886863	0.13132	-0.0123475	0.860475	IDP_dMRI_ProbtrackX_L2_str_r	Weighted-mean L2 in tract right superior thalamic radiation (from dMRI data)
GCST90004403	0.0399203	0.453581	0.0183023	0.818208	0.0517019	0.437001	0.0676081	0.107604	0.13977	0.246472	0.0190329	0.831924	0.108411	0.469579	-0.11246	0.227457	-0.194541	0.18245	-0.168989	0.136966	0.0374148	0.838168	0.0626116	0.0421118	0.130555	0.00169713	0.0679127	0.385193	IDP_dMRI_TBSS_OD_Pontine_crossing_tract	Mean OD (orientation dispersion index) in pontine crossing tract on FA (fractional anisotropy) skeleton (from dMRI data)
GCST90004160	-0.117347	0.165254	-0.0806735	0.6269	-0.152363	0.0468701	-0.107564	0.0274943	-0.153921	0.195511	0.168467	0.0924027	-0.0217022	0.926855	0.235953	0.145494	0.22656	0.273105	0.255611	0.137021	0.128498	0.653903	-0.0677342	0.170984	-0.116499	0.0252425	-0.0415416	0.679149	IDP_dMRI_TBSS_L2_Cingulum_hippocampus_L	Mean L2 in cingulum hippocampus (left) on FA (fractional anisotropy) skeleton (from dMRI data)
GCST90003489	-0.0559886	0.549513	0.0514636	0.761076	-0.140432	0.368447	-0.157097	0.0122458	-0.0444243	0.81066	-0.041059	0.729639	0.0697962	0.814933	0.15877	0.43119	0.0584761	0.853394	0.363207	0.138709	0.644285	0.10956	-0.0923677	0.0961667	-0.114466	0.0541173	0.0931978	0.343694	aparc-Desikan_rh_thickness_lateraloccipital	Mean thickness of lateraloccipital in the right hemisphere generated by parcellation of the white surface using Desikan-Killiany parcellation
GCST90006352	-0.0233071	0.722533	-0.0537671	0.640112	0.00324891	0.972931	0.000959766	0.983969	0.03055	0.750174	0.0876591	0.340181	-0.260364	0.0449504	-0.124546	0.282972	0.0381891	0.833843	-0.212079	0.140356	0.0293164	0.898529	0.00909674	0.766893	0.022666	0.565285	0.0319051	0.594541	QC_SWI-to-T1_linear_alignment_discrepancy	Discrepancy between the (magnitude) SWI brain image (linearly-aligned to the T1) and the T1 brain image
GCST90003255	-0.0105232	0.95084	-0.0355031	0.881311	0.00771235	0.958387	0.0664974	0.535597	0.457381	0.0526363	0.105664	0.643126	-0.198967	0.706068	0.147915	0.435529	-0.121081	0.682888	0.345579	0.141031	-0.261322	0.48158	0.122447	0.130448	0.202326	0.0440357	0.237805	0.113214	aparc-DKTatlas_lh_area_posteriorcingulate	Area of posteriorcingulate in the left hemisphere generated by parcellation of the white surface using DKT parcellation
Mean_inferiortemporal_thickavg_20200522_noGC	-1.88366	0.397664	-0.50114	0.889056	-2.57853	0.0666078	-2.95305	0.000132436	-3.41341	0.341655	-0.942498	0.469589	-6.20702	0.00525365	-4.71609	0.12158	-5.03928	0.598561	-5.10712	0.143243	-6.13142	0.669232	-2.95863	0.00508137	-3.14072	0.00013477	-2.00513	0.295844	NA	NA
GCST90005814	0.0651908	0.702587	0.166914	0.336023	-0.0128473	0.953923	-0.0696594	0.764127	-0.0170505	0.929594	-0.0462741	0.781848	0.0110052	0.968647	0.416014	0.0188309	0.659387	0.0177677	0.320641	0.144014	0.954364	0.00658686	-0.0135913	0.924867	0.0441125	0.810517	-0.031813	0.894081	rfMRI connectivity (ICA100 edge 961)
GCST90003245	0.0497429	0.378717	0.156904	0.0341593	-0.0230713	0.735114	0.0351291	0.602615	0.186783	0.0375796	-0.00149151	0.985448	0.00877395	0.953943	0.0753686	0.421398	-0.174478	0.268664	0.169255	0.144179	-0.00925923	0.960266	0.0458417	0.386325	0.0335195	0.604962	0.0185654	0.719858	aparc-DKTatlas_lh_area_lingual	Area of lingual in the left hemisphere generated by parcellation of the white surface using DKT parcellation
GCST90002746	0.132974	0.03857	0.161366	0.093665	0.125902	0.116539	0.0975081	0.348056	0.057552	0.772754	0.0451535	0.733282	0.194805	0.367163	0.127234	0.399711	-0.0431581	0.871599	0.254779	0.14512	-0.0873992	0.753175	0.114416	0.231488	0.126699	0.227909	0.138295	0.19055	ThalamNuclei_rh_volume_Pf	Volume of Pf in the right hemisphere generated by subcortical volumetric sub-segmentation of the Thalamic Nuclei
GCST90003397	-0.119545	0.402445	-0.212989	0.224338	-0.062444	0.608117	-0.0611636	0.399404	0.242957	0.162839	0.202827	0.150088	-0.0480018	0.836124	0.288403	0.079553	0.302067	0.239514	0.294384	0.14676	0.242938	0.447547	0.0427084	0.592936	0.0281032	0.682898	0.231656	0.00395372	aparc-a2009s_rh_area_G-parietal-sup	Area of G-parietal-sup in the right hemisphere generated by parcellation of the white surface using Destrieux (a2009s) parcellation
GCST90004196	0.00576982	0.950598	0.174175	0.0845178	-0.100463	0.224263	-0.0716167	0.442303	-0.268304	0.00969886	-0.0624331	0.55892	-0.0523597	0.759338	-0.108949	0.47234	0.0944138	0.605359	-0.222868	0.149501	0.0240047	0.916057	-0.0918767	0.26718	-0.100584	0.255376	-0.0812832	0.381824	IDP_dMRI_TBSS_L3_Superior_corona_radiata_L	Mean L3 in superior corona radiata (left) on FA (fractional anisotropy) skeleton (from dMRI data)
GCST90002855	0.0433397	0.637483	0.175199	0.183298	0.0558999	0.527678	-0.11816	0.0473527	-0.004546	0.977558	-0.0856955	0.45704	1.50638e-05	0.999958	0.140045	0.300568	6.72155e-05	0.999619	0.200495	0.151214	0.127234	0.469542	-0.100378	0.0259901	-0.060309	0.280634	-0.204572	0.0423923	BA-exvivo_rh_volume_BA6	Volume of BA6 in the right hemisphere generated by parcellation of the white surface using BA_exvivo parcellation
GCST90004074	0.119463	0.222542	0.343495	0.0160349	-0.0237849	0.841989	0.0731251	0.401784	-0.165108	0.395101	0.0128872	0.939556	-0.135407	0.638869	0.195484	0.373557	0.0703048	0.823483	0.35698	0.15394	0.0235938	0.966745	0.010877	0.903996	0.109954	0.452136	-0.00213916	0.986682	IDP_dMRI_TBSS_MD_Tapetum_L	Mean MD (mean diffusivity) in tapetum (left) on FA (fractional anisotropy) skeleton (from dMRI data)
GCST90003781	-0.115935	0.0830881	-0.00194471	0.988846	-0.182905	0.0400045	-0.0449655	0.357925	-0.0454751	0.797855	-0.128379	0.136599	0.0203179	0.889136	-0.159895	0.333312	0.0996776	0.778489	-0.25807	0.154233	0.164499	0.68598	-0.0773155	0.0840801	-0.0595022	0.243678	-0.0833831	0.197024	aseg_rh_intensity_Cerebellum-Cortex	Mean intensity of Cerebellum-Cortex in the right hemisphere generated by subcortical volumetric segmentation (aseg)
GCST90004359	0.0374365	0.430373	-0.0204074	0.753976	0.0821476	0.115569	0.0912458	0.0276471	0.143356	0.0616875	-0.0853574	0.137968	0.106837	0.270028	-0.0552378	0.535566	-0.0429335	0.667813	-0.112883	0.154262	-0.0520389	0.678571	0.0631864	0.146184	0.0744388	0.0842301	0.0271271	0.669913	IDP_dMRI_TBSS_ICVF_External_capsule_R	Mean ICVF (intra-cellular volume fraction) in external capsule (right) on FA (fractional anisotropy) skeleton (from dMRI data)
GCST90004305	-0.0557786	0.361376	0.00150987	0.983136	-0.0875775	0.2006	-0.132998	0.0321612	-0.0677007	0.45846	0.0727507	0.356359	0.0694371	0.635442	-0.138441	0.172131	-0.0659952	0.679049	-0.179409	0.154476	-0.0792288	0.692737	-0.085095	0.0329133	-0.116673	0.00603304	0.0446207	0.518068	IDP_dMRI_ProbtrackX_L3_cgc_r	Weighted-mean L3 in tract right cingulate gyrus part of cingulum (from dMRI data)
GCST90002725	0.0614494	0.476018	0.059864	0.790782	0.0271973	0.800454	-0.174546	0.0115051	-0.295893	0.0533866	-0.0346257	0.793648	0.0918532	0.680096	0.0531816	0.672227	-0.214287	0.277128	0.222543	0.154526	-0.311456	0.277838	-0.14549	0.00568069	-0.242584	0.000203025	-0.104602	0.292847	ThalamNuclei_lh_volume_CeM	Volume of CeM in the left hemisphere generated by subcortical volumetric sub-segmentation of the Thalamic Nuclei
GCST90004055	-0.0478859	0.566434	-0.0218953	0.807827	-0.0677885	0.503867	-0.0481824	0.342365	-0.218841	0.0124553	0.191726	0.024137	0.275731	0.0288076	0.209807	0.0219592	0.395133	0.014807	0.161467	0.155611	0.471079	0.0323518	-0.0302742	0.39614	-0.0590381	0.183026	0.0976252	0.100864	IDP_dMRI_TBSS_MD_Posterior_thalamic_radiation_R	Mean MD (mean diffusivity) in posterior thalamic radiation (right) on FA (fractional anisotropy) skeleton (from dMRI data)
GCST90004230	0.00691641	0.872141	0.0224811	0.726614	0.00526793	0.926667	-0.106255	0.0250641	-0.082074	0.289567	0.0550364	0.536549	0.104423	0.350552	0.153009	0.104111	0.140839	0.459165	0.164926	0.156506	0.112331	0.596988	-0.0686786	0.0161514	-0.0789349	0.0392223	-0.00203168	0.972227	IDP_dMRI_ProbtrackX_MD_fmi	Weighted-mean MD (mean diffusivity) in tract forceps minor (from dMRI data)
GCST90003101	-0.177787	0.0309102	-0.212309	0.0198648	-0.0994049	0.284407	0.020673	0.715919	0.0720323	0.646842	0.0393573	0.670341	-0.0724863	0.63853	0.111145	0.243985	0.178683	0.23054	0.16663	0.15993	0.0276975	0.883244	0.056412	0.120714	0.0213559	0.636231	0.101068	0.141822	aparc-Desikan_lh_area_superiorparietal	Area of superiorparietal in the left hemisphere generated by parcellation of the white surface using Desikan-Killiany parcellation
GCST90003141	-0.0488958	0.733018	0.0228673	0.854938	-0.108255	0.479086	0.139994	0.190291	0.304475	0.141205	0.290341	0.0319098	0.0860524	0.656598	0.227106	0.121126	0.414958	0.0704782	0.252334	0.162244	0.567041	0.0473127	0.170158	0.129611	0.197978	0.123903	0.180378	0.219132	aparc-pial_lh_area_TotalSurface	Area of TotalSurface in the left hemisphere generated by parcellation of the pial surface using Desikan-Killiany parcellation
GCST90004615	-0.132413	0.235394	-0.018655	0.91109	-0.208826	0.133958	-0.10753	0.49935	-0.0887202	0.646537	-0.0291871	0.888099	0.356349	0.568309	-0.549265	0.00142838	-0.838427	0.00188419	-0.298304	0.166435	-0.895132	0.00789463	0.0016657	0.982409	0.0642283	0.782124	0.0546871	0.663076	rfMRI amplitudes (ICA100 node 27)
GCST90004593	-0.268428	0.141607	-0.225856	0.23726	-0.283529	0.0848855	-0.228591	0.382203	-0.40207	0.151838	0.0391254	0.80753	-0.628276	0.0195994	-0.480581	0.0330536	-0.678596	0.10715	-0.387665	0.166498	-0.842468	0.0558141	-0.221958	0.290534	-0.2772	0.151639	-0.136624	0.44801	rfMRI amplitudes (ICA100 node 5)
GCST90002976	-0.24969	0.0219425	-0.249179	0.126777	-0.2552	0.0605358	-0.0911811	0.381732	-0.00206356	0.997354	0.118472	0.545909	-0.235875	0.425023	0.238076	0.460516	-0.210071	0.680669	0.538846	0.168497	-0.44547	0.487755	-0.0117418	0.918367	0	1	0	1	aparc-a2009s_lh_volume_S-front-inf	Volume of S-front-inf in the left hemisphere generated by parcellation of the white surface using Destrieux (a2009s) parcellation
GCST90003286	-0.0889461	0.269426	0.0483417	0.787238	-0.217149	0.0307477	0.14909	0.162762	0.388147	0.0684143	0.24349	0.0379466	0.274918	0.160171	-0.0596056	0.705144	0.265979	0.280381	-0.356862	0.171735	-0.00765484	0.980167	0.19717	0.0465237	0.052509	0.56039	0.250695	0.0100503	aparc-DKTatlas_rh_area_posteriorcingulate	Area of posteriorcingulate in the right hemisphere generated by parcellation of the white surface using DKT parcellation
GCST90004249	0.0629823	0.472384	0.093301	0.352571	0.0285945	0.810909	-0.0306348	0.687248	-0.32457	0.000716271	-0.030443	0.735774	0.0760186	0.638681	0.222031	0.309312	0.375495	0.206327	0.234313	0.172228	0.398064	0.209465	-0.0546389	0.431769	-0.0792498	0.303136	-0.0215354	0.811349	IDP_dMRI_ProbtrackX_L1_atr_r	Weighted-mean L1 in tract right anterior thalamic radiation (from dMRI data)
GCST90002593	0.131433	0.194187	0.0738555	0.689544	0.165134	0.191458	-0.0482214	0.728878	0.0131129	0.941782	0.474706	0.00224853	0.197694	0.493458	-0.0667638	0.414414	0.0373938	0.769129	-0.131291	0.172701	0.158045	0.523403	0.0150792	0.904492	-0.00557093	0.972835	0.254932	0.0283035	aseg_global_volume_SubCortGray	Volume of SubCortGray in the whole brain generated by subcortical volumetric segmentation (aseg)
GCST90003085	0.0700841	0.204305	0.174768	0.0219742	0.000889615	0.989445	0.053203	0.434746	0.187145	0.0513144	-0.0212231	0.799506	-0.0264367	0.866289	0.0685094	0.469359	-0.198934	0.201007	0.15914	0.174353	-0.0095188	0.961496	0.0549567	0.320045	0.0434732	0.523199	0.00957065	0.859478	aparc-Desikan_lh_area_lingual	Area of lingual in the left hemisphere generated by parcellation of the white surface using Desikan-Killiany parcellation
GCST90002935	0.0640361	0.210099	0.182455	0.00627129	-0.0112351	0.841572	-0.0126016	0.733692	-0.0223537	0.77752	-0.120999	0.0934606	-0.0241743	0.885538	0.100755	0.301745	0.147276	0.27774	0.138381	0.17586	0.251929	0.109128	-0.037031	0.308101	-0.028062	0.550086	-0.0821125	0.233532	aparc-a2009s_lh_volume_G-cuneus	Volume of G-cuneus in the left hemisphere generated by parcellation of the white surface using Destrieux (a2009s) parcellation
GCST90003946	-0.0446909	0.611824	-0.0550603	0.641294	-0.0392432	0.683013	0.161819	0.0099202	0.102004	0.436964	-0.149624	0.087904	0.0196651	0.936386	0.09754	0.337053	0.0753342	0.629933	0.162472	0.177025	0.230603	0.224776	0.0686776	0.281355	0.0727647	0.11037	-0.0149377	0.843329	IDP_dMRI_ProbtrackX_FA_slf_l	Weighted-mean FA (fractional anisotropy) in tract left superior longitudinal fasciculus (from dMRI data)
Mean_cuneus_thickavg_20200522_noGC	0.848446	0.570698	1.93422	0.244389	-0.00672917	0.997546	-0.768836	0.245085	-3.4208	0.0273257	-2.51861	0.175008	-1.83708	0.4421	-2.75869	0.161565	-0.502471	0.870264	-3.25145	0.17812	-0.229438	0.96214	-0.729892	0.196639	-0.786636	0.205506	-2.1327	0.0483187	NA	NA
GCST90004362	0.0117145	0.813575	0.0367237	0.529697	-0.0134001	0.813402	0.0920153	0.0477875	0.230876	0.00732744	0.0598189	0.382157	0.0716437	0.497122	-0.13613	0.117973	-0.154572	0.182685	-0.149302	0.18108	-0.0823419	0.64559	0.0746828	0.0568697	0.0940382	0.0167989	0.110242	0.0155435	IDP_dMRI_TBSS_ICVF_Cingulum_cingulate_gyrus_L	Mean ICVF (intra-cellular volume fraction) in cingulum cingulate gyrus (left) on FA (fractional anisotropy) skeleton (from dMRI data)
GCST90003231	0.0533853	0.363965	0.0932556	0.146932	0.019495	0.789748	0.0658679	0.247942	0.119398	0.206788	-0.0158423	0.833201	0.0138925	0.923141	0.198878	0.044001	0.161646	0.313938	0.150968	0.181428	0.21072	0.246692	0.047223	0.341981	0.0430194	0.485684	-0.00103375	0.985089	BA-exvivo_rh_area_V2	Area of V2 in the right hemisphere generated by parcellation of the white surface using BA_exvivo parcellation
GCST90002437	-0.0286821	0.827358	0.0211631	0.892239	-0.0798701	0.761994	0.0132774	0.910002	-0.127466	0.524906	-0.0738563	0.65361	-0.000564438	0.998428	0.864365	0.0133185	1.1077	0.0425435	0.556981	0.181484	0.797153	0.246053	0.0902232	0.21183	0.0472268	0.616204	0.172632	0.227296	IDP_T1_FIRST_right_thalamus_volume	Volume of right thalamus (from T1 brain image)
GCST90004526	-0.153463	0.0431305	-0.0606373	0.593329	-0.20359	0.0316065	-0.0335242	0.716276	0.19016	0.18031	0.0296041	0.807036	-0.495577	0.0258078	-0.173756	0.415587	0.273146	0.413772	-0.465742	0.182802	0.490808	0.242645	-0.0403044	0.459985	-0.0370942	0.53364	-0.139511	0.126027	IDP_dMRI_ProbtrackX_ISOVF_ar_r	Weighted-mean ISOVF (isotropic or free water volume fraction) in tract right acoustic radiation (from dMRI data)
GCST90003937	-0.0493848	0.58141	-0.120648	0.111867	0.000320714	0.997605	0.139996	0.0578104	0.0990235	0.266012	-0.0608103	0.426668	-0.151065	0.240248	-0.150625	0.177984	-0.179154	0.373382	-0.18245	0.185097	-0.121231	0.638518	0.0861335	0.136418	0.121497	0.0174871	-0.0555171	0.33148	IDP_dMRI_ProbtrackX_FA_ifo_l	Weighted-mean FA (fractional anisotropy) in tract left inferior fronto-occipital fasciculus (from dMRI data)
GCST90004134	-0.070157	0.453562	0.0658983	0.638273	-0.148201	0.205036	-0.14537	0.0708361	-0.171603	0.413732	0.373548	0.0149955	-0.00551603	0.98297	-0.216325	0.127625	-0.428365	0.204439	-0.234609	0.186147	-0.503548	0.0704141	-0.0606328	0.320478	-0.10595	0.159508	0.149658	0.259657	IDP_dMRI_TBSS_L2_Inferior_cerebellar_peduncle_L	Mean L2 in inferior cerebellar peduncle (left) on FA (fractional anisotropy) skeleton (from dMRI data)
GCST90002667	0.0178755	0.851795	0.0884407	0.418494	-0.0366913	0.690713	-0.0625031	0.45997	-0.308639	0.035848	-0.0055855	0.968097	0.227427	0.225151	0.0696096	0.535626	-0.0639464	0.717968	0.208972	0.186946	-0.292548	0.187572	-0.0870381	0.0456279	-0.125176	0.171881	0.159565	0.253186	AmygNuclei_rh_volume_Whole-amygdala	Volume of Whole-amygdala in the right hemisphere generated by subcortical volumetric sub-segmentation of the Amygdala Nuclei
GCST90004503	-0.186687	0.190867	-0.295463	0.167101	-0.13171	0.459812	-0.153598	0.0177395	0.0741863	0.658171	0.301516	0.0142802	0.0268247	0.88733	-0.219852	0.191605	-0.112483	0.668313	-0.275574	0.18776	-0.177854	0.587633	-0.0229841	0.644669	-0.116397	0.0366413	0.170314	0.0439696	IDP_dMRI_TBSS_ISOVF_Posterior_corona_radiata_R	Mean ISOVF (isotropic or free water volume fraction) in posterior corona radiata (right) on FA (fractional anisotropy) skeleton (from dMRI data)
GCST90004335	0.116978	0.0394959	0.142728	0.183611	0.0918517	0.195633	0.0485597	0.336396	-0.0551556	0.582273	-0.135896	0.233697	0.0269215	0.865592	-0.154827	0.261558	-0.221565	0.127762	-0.177023	0.190435	-0.249746	0.169505	0.0187448	0.724577	0.0567981	0.183125	-0.0760943	0.437189	IDP_dMRI_TBSS_ICVF_Medial_lemniscus_R	Mean ICVF (intra-cellular volume fraction) in medial lemniscus (right) on FA (fractional anisotropy) skeleton (from dMRI data)
GCST90003475	0.00225246	0.986211	0.179038	0.358633	-0.0966198	0.55252	-0.251686	0.0908929	-0.565176	0.0776579	-0.358812	0.245603	-0.0650755	0.856267	0.231212	0.665565	0.20729	0.677466	0.512975	0.191986	0.41127	0.696479	-0.350259	0.00040122	-0.400645	0.00078173	-0.292857	0.0730059	aparc-Desikan_lh_thickness_supramarginal	Mean thickness of supramarginal in the left hemisphere generated by parcellation of the white surface using Desikan-Killiany parcellation
GCST90002904	-0.00466991	0.951993	0.0258254	0.779304	-0.11109	0.183473	-0.0587547	0.287038	0.132579	0.217032	-0.0726066	0.608329	-0.191056	0.219861	0.165074	0.177627	0.199357	0.300283	0.196084	0.193429	0.0780932	0.772447	-0.0569416	0.126277	-0.0817456	0.112984	-0.158561	0.0249464	aparc-DKTatlas_rh_volume_lingual	Volume of lingual in the right hemisphere generated by parcellation of the white surface using DKT parcellation
GCST90003945	0.0717292	0.25814	-0.00322978	0.972868	0.117411	0.13845	0.153331	0.00500424	0.0352416	0.809403	-0.0718053	0.491145	0.0999845	0.599575	0.173156	0.0744149	0.336258	0.0271005	0.157383	0.193825	0.271977	0.152946	0.0851629	0.138929	0.107927	0.0797392	-0.0201014	0.79698	IDP_dMRI_ProbtrackX_FA_ptr_r	Weighted-mean FA (fractional anisotropy) in tract right posterior thalamic radiation (from dMRI data)
GCST90002549	0.205024	0.000458289	0.227639	0.115447	0.196659	0.0177012	0.0898807	0.060692	0.258735	0.0141725	-0.00245219	0.98127	0.191725	0.334199	0.0203889	0.895593	-0.354564	0.0890346	0.253774	0.194255	-0.751268	0.00408804	0.0908937	0.0125734	0.106277	0.01823	0.0578981	0.532316	IDP_T1_FAST_ROIs_L_caudate	Volume of grey matter in Left Caudate
GCST90002813	-0.00402807	0.958491	0.026873	0.770286	-0.110308	0.186596	-0.0589119	0.285153	0.133336	0.214161	-0.0720925	0.610667	-0.189201	0.224095	0.165611	0.176419	0.201154	0.296139	0.195798	0.19429	0.0820425	0.761184	-0.0566224	0.128171	-0.0810274	0.116943	-0.157692	0.0256431	aparc-Desikan_rh_volume_lingual	Volume of lingual in the right hemisphere generated by parcellation of the white surface using Desikan-Killiany parcellation
GCST90003737	0.0125421	0.933587	-0.103511	0.507845	0.0778536	0.696365	-0.287239	0.0830065	-0.18673	0.313367	0.0956526	0.762922	-0.397172	0.547144	-0.375862	0.30412	-0.318533	0.256438	-0.523674	0.194773	-0.310537	0.377235	-0.236153	0.171808	-0.275426	0.0362727	-0.167615	0.532389	aparc-a2009s_rh_thickness_S-oc-temp-med+Lingual	Mean thickness of S-oc-temp-med+Lingual in the right hemisphere generated by parcellation of the white surface using Destrieux (a2009s) parcellation
GCST90004296	0.00446301	0.960966	0.0627695	0.564417	-0.0359981	0.711677	-0.0570487	0.594231	-0.115044	0.439533	0.0390231	0.706079	-0.0857398	0.68994	0.421554	0.0210652	0.460061	0.008324	0.371859	0.196186	0.428134	0.049995	-0.0679119	0.485092	-0.0626145	0.574039	-0.117618	0.226531	IDP_dMRI_ProbtrackX_L2_str_l	Weighted-mean L2 in tract left superior thalamic radiation (from dMRI data)
GCST90003360	-0.038843	0.885856	-0.00348499	0.988285	-0.0618468	0.830125	0.229629	0.00490839	0.168542	0.562345	0.392359	0.0100815	-0.0260855	0.94198	0.0198668	0.900306	0.25495	0.469823	-0.266362	0.196971	0.485414	0.267508	0.137217	0.467021	0.342062	1.58656e-06	0.284309	0.0597858	aparc-a2009s_lh_area_S-orbital-H-Shaped	Area of S-orbital-H-Shaped in the left hemisphere generated by parcellation of the white surface using Destrieux (a2009s) parcellation
GCST90003114	0.0279347	0.869831	0.0289584	0.887505	-0.00676834	0.962712	0.227767	0.00569209	0.228302	0.228262	0.0630747	0.615337	0.137228	0.573336	-0.134203	0.349337	-0.215692	0.342086	-0.230111	0.197	-0.417025	0.1435	0.184138	0.0959578	0.174104	0.0983265	0.146626	0.155564	aparc-Desikan_rh_area_inferiorparietal	Area of inferiorparietal in the right hemisphere generated by parcellation of the white surface using Desikan-Killiany parcellation
GCST90002550	0.149959	0.0119363	0.0616385	0.526004	0.201428	0.00680478	0.118243	0.00631222	0.255925	0.00744033	0.0583791	0.578144	0.111718	0.426247	0.136132	0.256925	0.0607805	0.734344	0.204432	0.19813	-0.148051	0.527699	0.0904972	0.0169685	0.115453	0.0045231	0.0242354	0.695797	IDP_T1_FAST_ROIs_R_caudate	Volume of grey matter in Right Caudate
GCST90005467	-0.0685469	0.724205	-0.0873691	0.588935	-0.0593213	0.786655	0	1	0	1	0	1	0	1	-0.0808095	0.327469	-0.294806	0.0218167	-0.13442	0.198877	-0.279512	0.0828009	0.0139127	0.842186	0.00761442	0.932109	0.213016	0.108814	rfMRI connectivity (ICA100 edge 614)
GCST90004273	-0.216209	0.015599	-0.131055	0.327307	-0.26691	0.016806	-0.0162009	0.833095	0.130274	0.583046	0.0310248	0.875828	-0.25372	0.588129	-0.178514	0.306575	0.166363	0.566537	-0.302533	0.199147	0.3028	0.37836	-0.0582505	0.375086	-0.0499003	0.488697	-0.0130525	0.944124	IDP_dMRI_ProbtrackX_L2_ar_l	Weighted-mean L2 in tract left acoustic radiation (from dMRI data)
GCST90004609	0	1	0	1	0	1	-0.122206	0.482351	-0.192188	0.370361	-0.0538491	0.832602	0.271954	0.650305	-0.618599	0.00222484	-1.0702	0.000795512	-0.321457	0.202993	-0.881235	0.0276223	-0.00769344	0.919827	0.044047	0.851942	0.00307332	0.982301	rfMRI amplitudes (ICA100 node 21)
Mean_insula_surfavg_20190429_noGC	0.000633091	0.0676848	0.000708519	0.0986865	0.00064049	0.0970105	0.000322103	0.226747	0.000624184	0.138911	-0.000811965	0.0165702	0.000851342	0.203291	0.000659753	0.105859	0.00041602	0.52123	0.000643439	0.204092	0.00010311	0.897628	0.000273764	0.284013	9.8436e-05	0.738694	-0.00024034	0.584735	NA	NA
Mean_lingual_thickavg_20200522_noGC	0.865024	0.253609	2.44422	0.0310921	-0.262404	0.806207	0.0721889	0.910936	0.186837	0.906679	-0.104793	0.941508	-1.59554	0.377237	0.281605	0.851914	-1.46753	0.536035	2.34795	0.205388	1.10886	0.710446	-0.00307981	0.996496	0.347887	0.677136	-1.25303	0.356776	NA	NA
GCST90003574	-0.0372099	0.811824	0.433192	0.0984324	-0.342263	0.0791759	-0.154081	0.0553731	-0.283197	0.103671	-0.108924	0.473457	-0.0497252	0.929847	-0.309484	0.228196	0.00604895	0.988098	-0.396125	0.205962	-0.0110479	0.982938	-0.120783	0.049255	-0.115206	0.129507	0.0215913	0.851666	aparc-DKTatlas_rh_thickness_cuneus	Mean thickness of cuneus in the right hemisphere generated by parcellation of the white surface using DKT parcellation
GCST90002967	0.240664	0.120003	-0.0402812	0.831918	0.401975	0.0835389	0.132183	0.208244	-0.460004	0.0478521	-0.00745146	0.970248	0.398921	0.43714	-0.167524	0.631917	0.554759	0.560797	-0.523746	0.213371	0.438315	0.691242	0.106379	0.182309	0.14548	0.142511	0.229074	0.128711	aparc-a2009s_lh_volume_Pole-temporal	Volume of Pole-temporal in the left hemisphere generated by parcellation of the white surface using Destrieux (a2009s) parcellation
GCST90003077	0.13566	0.0076136	0.224106	0.00321845	0.0834188	0.188225	0.00158217	0.978011	0.0827057	0.389591	-0.077356	0.404781	-0.126753	0.372526	0.122235	0.247608	0.0922454	0.577874	0.162451	0.213558	0.225881	0.277468	-0.00214246	0.965399	-0.007377	0.916781	-0.0865178	0.127058	aparc-Desikan_lh_area_cuneus	Area of cuneus in the left hemisphere generated by parcellation of the white surface using Desikan-Killiany parcellation
GCST90002445	-0.106087	0.297527	0.122224	0.466326	-0.199423	0.0497032	0.0724757	0.430307	0.0485634	0.787933	0.0979897	0.595878	-0.181549	0.399408	0.281236	0.245373	0.411844	0.170633	0.374971	0.214369	0.270324	0.423777	0.0148566	0.864021	0.0573463	0.70778	0.123149	0.350376	IDP_T1_FIRST_right_hippocampus_volume	Volume of right hippocampus (from T1 brain image)
GCST90004284	-0.00128261	0.972531	0.0359889	0.500087	-0.0197601	0.717822	-0.108817	0.00406897	-0.0948134	0.150775	0.0442606	0.489913	-0.0059499	0.949166	0.102999	0.149917	0.107556	0.340444	0.109518	0.21632	0.126908	0.369281	-0.0626547	0.041334	-0.0712145	0.0596752	0.0185208	0.66625	IDP_dMRI_ProbtrackX_L2_fmi	Weighted-mean L2 in tract forceps minor (from dMRI data)
GCST90004301	-0.102875	0.446589	0.0356374	0.780969	-0.186617	0.179041	-0.095755	0.278296	0.1058	0.697136	0.309305	0.0302402	-0.21047	0.715422	-0.0809318	0.592145	-0.0568559	0.811253	-0.301274	0.216328	-0.116988	0.730535	-0.0194767	0.731796	-0.0879124	0.20845	-0.00598262	0.977096	IDP_dMRI_ProbtrackX_L3_ar_r	Weighted-mean L3 in tract right acoustic radiation (from dMRI data)
GCST90004200	-0.00849929	0.934069	0.0547675	0.64326	-0.0596168	0.588604	-0.0854374	0.0534237	-0.255092	0.0118739	0.108574	0.337152	0.349197	0.0141084	0.165024	0.134773	0.270324	0.165154	0.168754	0.216698	0.188903	0.474843	-0.0462622	0.285586	-0.0951004	0.0395983	0.0874348	0.16655	IDP_dMRI_TBSS_L3_Posterior_thalamic_radiation_L	Mean L3 in posterior thalamic radiation (left) on FA (fractional anisotropy) skeleton (from dMRI data)
GCST90003605	0.314994	0.0882141	0.635146	0.0088802	0.106405	0.822173	-0.0941928	0.343728	-0.181736	0.529003	-0.250287	0.183296	0.147696	0.645024	-0.436075	0.099924	-0.30694	0.459648	-0.402317	0.217974	-0.236099	0.653329	-0.130575	0.084391	-0.120449	0.19937	-0.149322	0.542763	aparc-a2009s_lh_thickness_G+S-paracentral	Mean thickness of G+S-paracentral in the left hemisphere generated by parcellation of the white surface using Destrieux (a2009s) parcellation
GCST90004310	-0.0640031	0.657899	0.0707834	0.644964	-0.153859	0.358068	-0.124154	0.0373972	-0.00809168	0.951176	0.338392	0.00307247	0.0004565	0.998099	-0.190895	0.179069	-0.0586922	0.791878	-0.215967	0.219721	-0.0477056	0.864081	-0.052212	0.248981	-0.0782085	0.217772	0.117447	0.167134	IDP_dMRI_ProbtrackX_L3_fma	Weighted-mean L3 in tract forceps major (from dMRI data)
GCST90003488	0	1	0	1	0	1	-0.162828	0.417943	-0.52186	0.0337131	-0.0539424	0.885331	0.0289483	0.934542	-0.236882	0.346349	-0.0327182	0.934803	-0.380156	0.22088	-0.254669	0.611524	-0.075172	0.364057	-0.154845	0.335218	0.151649	0.490254	aparc-Desikan_rh_thickness_isthmuscingulate	Mean thickness of isthmuscingulate in the right hemisphere generated by parcellation of the white surface using Desikan-Killiany parcellation
GCST90004746	-0.113952	0.194321	-0.191604	0.144917	-0.0471258	0.667087	0.150174	0.0296798	0.083684	0.653689	0.233728	0.261129	-0.0212533	0.929828	0.17844	0.291892	0.199848	0.543108	0.254622	0.222308	0.352115	0.291052	0.0915351	0.0813375	0.064762	0.33704	0.0351849	0.720656	rfMRI connectivity (ICA25 edge 103)
GCST90004097	-0.0917324	0.242797	-0.027697	0.740024	-0.130767	0.191478	-0.115976	0.243558	-0.236061	0.0285565	0.0704037	0.400536	0.0346021	0.828935	0.0717796	0.555939	0.143711	0.421954	0.151829	0.224886	0.25015	0.205628	-0.106016	0.234063	-0.108567	0.28704	0.00485535	0.953179	IDP_dMRI_TBSS_L1_Anterior_corona_radiata_R	Mean L1 in anterior corona radiata (right) on FA (fractional anisotropy) skeleton (from dMRI data)
GCST90003845	0.0437109	0.418227	-0.00305004	0.968329	0.0655532	0.303551	0.0713371	0.086362	-0.184273	0.0148339	-0.0884975	0.307782	0.0253961	0.843695	0.048424	0.577618	-0.087446	0.522551	0.131052	0.227358	-0.0257092	0.893293	0.00462967	0.905276	0.0375814	0.355877	-0.0497732	0.422513	wg_rh_intensity-contrast_parsorbitalis	Grey-white contrast in parsorbitalis in the right hemisphere calculated as a percentage of the mean gray-white matter intensity from Desikan-Killiany parcellation
GCST90003025	-0.0703414	0.494888	-0.257822	0.18322	0.0352603	0.762441	-0.104615	0.194915	0.524762	0.00122364	0.0130865	0.939365	-0.0407843	0.860754	0.201317	0.190591	0.0582037	0.85429	0.229733	0.229013	-0.0777709	0.808459	0.0197725	0.718902	0.0341998	0.615766	0.0306662	0.814434	aparc-a2009s_rh_volume_G-parietal-sup	Volume of G-parietal-sup in the right hemisphere generated by parcellation of the white surface using Destrieux (a2009s) parcellation
GCST90005818	0.334005	0.0422203	0.457823	0.150913	0.23881	0.625115	-0.0250179	0.813818	-0.0219733	0.95035	0.18994	0.350076	-0.103991	0.842013	-0.20733	0.574089	-0.19712	0.734932	-0.355976	0.229214	-0.0505877	0.933262	-0.0282476	0.727571	-0.00426088	0.966028	0.208918	0.225431	rfMRI connectivity (ICA100 edge 965)
GCST90005240	0.0374794	0.607968	-0.15089	0.149327	0.157869	0.0653827	-0.0227957	0.662346	0.178205	0.259602	-0.00240133	0.989036	-0.0226748	0.892965	-0.187965	0.0903969	-0.471119	0.00649721	-0.166117	0.229363	-0.397344	0.065975	-0.0239726	0.67676	-0.04003	0.525983	-0.00401695	0.975031	rfMRI connectivity (ICA100 edge 387)
GCST90004330	-0.0453684	0.158184	-0.0143372	0.731968	-0.0680889	0.122904	0.101899	0.00280888	0.0160244	0.79836	-0.0159749	0.738573	-0.00896396	0.916244	0.052731	0.29188	0.0338374	0.666628	0.0746357	0.230596	0.0943704	0.337307	0.0452169	0.172699	0.0634269	0.0679319	-0.00260297	0.935689	IDP_dMRI_TBSS_ICVF_Body_of_corpus_callosum	Mean ICVF (intra-cellular volume fraction) in body of corpus callosum on FA (fractional anisotropy) skeleton (from dMRI data)
GCST90003721	0.190488	0.148762	0.449821	0.0824902	0.0358245	0.914415	-0.0842055	0.364179	-0.519064	0.0121663	-0.263944	0.139876	0.371801	0.213928	-0.452668	0.247316	-0.234944	0.697766	-0.555782	0.233575	0.615004	0.427414	-0.124321	0.0777011	-0.112277	0.195676	-0.109585	0.45589	aparc-a2009s_rh_thickness_S-central	Mean thickness of S-central in the right hemisphere generated by parcellation of the white surface using Destrieux (a2009s) parcellation
GCST90004061	0.0348169	0.408747	0.078937	0.154231	0.00111735	0.982451	-0.0478704	0.406335	-0.080978	0.318169	0.065616	0.252506	0.0741121	0.503714	0.160764	0.0800129	0.259033	0.0498408	0.108072	0.233769	0.296949	0.155306	-0.0418871	0.36175	-0.0470307	0.221173	0.0270223	0.591543	IDP_dMRI_TBSS_MD_Cingulum_cingulate_gyrus_R	Mean MD (mean diffusivity) in cingulum cingulate gyrus (right) on FA (fractional anisotropy) skeleton (from dMRI data)
GCST90003938	-0.054898	0.351117	-0.104506	0.134112	-0.0229448	0.74123	0.107795	0.0449947	-0.0123249	0.889819	-0.0285325	0.762967	-0.0530183	0.703958	0.0971483	0.435241	0.0560788	0.774983	0.16946	0.235972	0.105869	0.718026	0.0348047	0.44906	0.0708428	0.131038	-0.0508059	0.500259	IDP_dMRI_ProbtrackX_FA_ifo_r	Weighted-mean FA (fractional anisotropy) in tract right inferior fronto-occipital fasciculus (from dMRI data)
GCST90004285	0.0304071	0.66154	0.0348889	0.613141	0.0231468	0.817729	-0.115485	0.0524841	-0.152047	0.063509	0.0414201	0.612171	0.106313	0.367384	0.139771	0.209122	0.249823	0.1863	0.138556	0.239099	0.242791	0.253009	-0.0874671	0.0166415	-0.109838	0.0235659	-0.00633771	0.925041	IDP_dMRI_ProbtrackX_L2_ifo_l	Weighted-mean L2 in tract left inferior fronto-occipital fasciculus (from dMRI data)
GCST90004102	-0.0545631	0.476057	0.0728889	0.530632	-0.141013	0.116976	-0.132536	0.0521833	-0.143048	0.278634	0.0274251	0.788471	0.08791	0.572202	-0.153242	0.21482	-0.051703	0.784875	-0.136087	0.241492	-0.0168081	0.933617	-0.131432	0.0555778	-0.151303	0.0328342	-0.00858833	0.923366	IDP_dMRI_TBSS_L1_Posterior_corona_radiata_L	Mean L1 in posterior corona radiata (left) on FA (fractional anisotropy) skeleton (from dMRI data)
GCST90003171	-0.0338142	0.784211	-0.128879	0.37869	0.017131	0.878294	0.0640749	0.385036	0.277932	0.411201	0.334268	0.0731625	-0.200661	0.397507	0.262071	0.229129	0.0585692	0.83033	0.356557	0.24296	-0.251134	0.551637	0.126963	0.0231431	0.11826	0.0871882	0.284085	0.00871238	aparc-pial_lh_area_supramarginal	Area of supramarginal in the left hemisphere generated by parcellation of the pial surface using Desikan-Killiany parcellation
GCST90003852	-0.0169616	0.707264	-0.0781306	0.247546	0.0110167	0.86383	0.0460582	0.303636	-0.129519	0.0815822	-0.0774038	0.27155	-0.0134292	0.90118	-0.16845	0.0400129	-0.241747	0.0597928	-0.123153	0.243546	-0.277667	0.0844357	0.0150673	0.649885	0.0512582	0.146344	-0.0407416	0.481785	wg_rh_intensity-contrast_rostralanteriorcingulate	Grey-white contrast in rostralanteriorcingulate in the right hemisphere calculated as a percentage of the mean gray-white matter intensity from Desikan-Killiany parcellation
GCST90003273	0.421926	0.00865744	0.409779	0.0306617	0.418571	0.00810616	-0.0812753	0.480882	-0.0627754	0.785955	-0.146555	0.828304	-0.137405	0.683495	0.161953	0.532099	0.111175	0.754076	0.380392	0.245208	0.375426	0.400953	-0.0487076	0.537291	-0.0811763	0.556123	-0.164491	0.379104	aparc-DKTatlas_rh_area_isthmuscingulate	Area of isthmuscingulate in the right hemisphere generated by parcellation of the white surface using DKT parcellation
GCST90003521	-0.0519111	0.786095	-0.0449514	0.85873	-0.037045	0.811746	-0.0945585	0.394705	-0.57257	0.00216193	-0.238868	0.313622	-0.123578	0.653515	0.086016	0.690283	-0.187903	0.756429	0.311416	0.245914	-0.365088	0.582345	-0.152007	0.0192291	-0.232983	0.00396276	-0.184639	0.138797	BA-exvivo_lh_thickness_BA45	Mean thickness of BA45 in the left hemisphere generated by parcellation of the white surface using BA_exvivo parcellation
GCST90003915	-0.183517	0.108733	-0.113163	0.508935	-0.201912	0.157421	0.0974516	0.422787	0.208477	0.509022	-0.108756	0.584058	0.797658	0.0180901	0.202743	0.368954	0.120187	0.751462	0.324382	0.247985	0.64556	0.355196	-0.00474258	0.952071	-0.0472675	0.626203	-0.0329055	0.824978	IDP_dMRI_TBSS_FA_Fornix_cres+Stria_terminalis_R	Mean FA (fractional anisotropy) in fornix cres+stria terminalis (right) on FA skeleton (from dMRI data)
GCST90003616	-0.136946	0.533728	-0.160177	0.563703	-0.101767	0.599711	-0.147774	0.38344	-0.673551	0.00334483	-0.388148	0.154202	-0.12685	0.705394	0.10826	0.649859	-0.154508	0.821353	0.337617	0.254164	-0.34503	0.651484	-0.213396	0.00733889	-0.288995	0.00346287	-0.257745	0.088557	aparc-a2009s_lh_thickness_G-front-inf-Triangul	Mean thickness of G-front-inf-Triangul in the left hemisphere generated by parcellation of the white surface using Destrieux (a2009s) parcellation
GCST90002657	-0.11146	0.393634	0.0176329	0.890339	-0.207869	0.124338	-0.0394204	0.654752	-0.377288	0.0033601	-0.180982	0.111875	0.00914641	0.961572	0.0428657	0.808609	-0.037705	0.902657	0.209231	0.254937	-0.157268	0.59629	-0.112299	0.0772746	-0.302878	0.00151275	-0.0512339	0.72339	AmygNuclei_lh_volume_Whole-amygdala	Volume of Whole-amygdala in the left hemisphere generated by subcortical volumetric sub-segmentation of the Amygdala Nuclei
GCST90003116	0.410608	0.0111406	0.398454	0.032463	0.407742	0.00832396	-0.0782127	0.491469	-0.0606422	0.788555	-0.150833	0.819006	-0.133289	0.685987	0.155067	0.541527	0.11052	0.749058	0.367083	0.255163	0.367826	0.397971	-0.046931	0.543412	-0.077863	0.566389	-0.162959	0.368148	aparc-Desikan_rh_area_isthmuscingulate	Area of isthmuscingulate in the right hemisphere generated by parcellation of the white surface using Desikan-Killiany parcellation
GCST90003613	-0.059321	0.729268	0.183087	0.727608	-0.231641	0.460959	-0.127977	0.125742	-0.3571	0.0481162	-0.15598	0.321965	0.22376	0.406483	-0.632411	0.0556873	-1.00545	0.0508343	-0.690001	0.25602	-0.507178	0.644797	-0.117021	0.0664055	-0.0927292	0.238726	0.0574259	0.630905	aparc-a2009s_lh_thickness_G-cuneus	Mean thickness of G-cuneus in the left hemisphere generated by parcellation of the white surface using Destrieux (a2009s) parcellation
Mean_cuneus_surfavg_20190429_noGC	0.000891023	0.0107406	0.000817482	0.117533	0.000989014	0.0235059	0.000481007	0.250661	0.00133041	0.0359581	1.71925e-06	0.997818	0.000309559	0.770833	-8.21648e-05	0.888878	6.53562e-05	0.94355	-0.000847714	0.256074	0.00030909	0.790044	0.000647151	0.106885	0.000594412	0.225913	0.0001441	0.817716	NA	NA
GCST90004511	-0.0556063	0.504349	0.029692	0.795685	-0.0963376	0.313726	0.10345	0.167185	0.113139	0.500508	0.277927	0.0175328	-0.102311	0.756166	-0.173574	0.489076	0.0698628	0.881472	-0.359114	0.25664	0.225947	0.702009	0.0365919	0.431017	0.0410439	0.477471	0.038174	0.685641	IDP_dMRI_TBSS_ISOVF_Cingulum_cingulate_gyrus_R	Mean ISOVF (isotropic or free water volume fraction) in cingulum cingulate gyrus (right) on FA (fractional anisotropy) skeleton (from dMRI data)
GCST90002443	0.0985276	0.222136	-0.0408855	0.735125	0.189193	0.245237	0.215363	0.00104787	0.061622	0.693635	0.209786	0.366673	0.214934	0.308328	0.271721	0.0761577	0.44761	0.0633882	0.263614	0.256826	0.553094	0.0700789	0.178312	0.0974195	0.145317	0.150121	0.198006	0.177926	IDP_T1_FIRST_right_pallidum_volume	Volume of right pallidum (from T1 brain image)
GCST90004011	0.023237	0.841206	-0.00317421	0.985403	0.0192064	0.894428	-0.16496	0.0748283	0.00463671	0.981885	-0.0107512	0.951675	0.330438	0.325415	0.296658	0.311999	0.391457	0.5834	0.402643	0.257339	0.552601	0.421794	-0.00797265	0.909739	-0.132724	0.127947	0.303319	0.0220174	IDP_dMRI_ProbtrackX_MO_fmi	Weighted-mean MO (diffusion tensor mode) in tract forceps minor (from dMRI data)
GCST90004512	0.0256307	0.793229	0.104758	0.495126	-0.0202386	0.868317	0.00819205	0.911653	-0.0468199	0.866952	0.0445445	0.781326	-0.555828	0.0174612	-0.179276	0.338672	-0.0577278	0.843705	-0.406153	0.257456	-0.25314	0.489769	-0.0520368	0.351695	-0.00557432	0.936099	-0.238211	0.0235248	IDP_dMRI_TBSS_ISOVF_Cingulum_cingulate_gyrus_L	Mean ISOVF (isotropic or free water volume fraction) in cingulum cingulate gyrus (left) on FA (fractional anisotropy) skeleton (from dMRI data)
GCST90003919	0.253443	0.0294949	0.290117	0.0954869	0.249555	0.0858002	-0.0187126	0.840173	-0.286312	0.158084	-0.290596	0.0985239	-0.179661	0.540834	0.0290836	0.89781	-0.535229	0.12688	0.31658	0.2582	-0.479136	0.390561	-0.091896	0.191908	-0.034673	0.691805	-0.293516	0.0278116	IDP_dMRI_TBSS_FA_Superior_fronto-occipital_fasciculus_R	Mean FA (fractional anisotropy) in superior fronto-occipital fasciculus (right) on FA skeleton (from dMRI data)
GCST90002723	0.309376	0.181694	0.12733	0.747627	0.427373	0.0609516	0.267855	0.0202338	0.406625	0.0854949	0.162448	0.209813	0.176279	0.630651	0.585943	0.00689709	0.67028	0.0485815	0.300213	0.260024	0.19806	0.657049	0.270558	0.0382716	0.163064	0.0303526	0.0489846	0.715319	ThalamNuclei_lh_volume_VAmc	Volume of VAmc in the left hemisphere generated by subcortical volumetric sub-segmentation of the Thalamic Nuclei
Mean_paracentral_surfavg_20190429_noGC	3.96808e-05	0.940592	0.000470063	0.481594	-0.00020279	0.722169	-0.000110827	0.844119	0.00171773	0.0162447	-0.000813732	0.203817	0.00192192	0.174429	-0.00105686	0.149965	-0.00104623	0.363247	-0.00101908	0.260749	-0.00142153	0.324239	0.000176539	0.733461	0.000160738	0.827027	-5.71645e-05	0.949765	NA	NA
GCST90004312	0.0321722	0.524698	0.0406138	0.507186	0.0252022	0.731086	-0.120791	0.0126532	-0.115695	0.124636	0.0535783	0.438039	0.0814814	0.452738	0.156735	0.0897185	0.272614	0.0772673	0.118579	0.261517	0.327198	0.104883	-0.071198	0.0244839	-0.0930346	0.0193009	0.00182889	0.973582	IDP_dMRI_ProbtrackX_L3_ifo_l	Weighted-mean L3 in tract left inferior fronto-occipital fasciculus (from dMRI data)
GCST90004394	-0.00121216	0.981248	-0.000689556	0.989799	-0.00454369	0.937748	0.0635305	0.053034	0.13539	0.0182786	-0.0576061	0.244546	-0.0701545	0.439682	-0.0596305	0.362288	-0.124595	0.292789	-0.0809804	0.26305	-0.16593	0.256575	0.0444153	0.13589	0.0688998	0.0493974	0.00920777	0.829063	IDP_dMRI_ProbtrackX_ICVF_ptr_l	Weighted-mean ICVF (intra-cellular volume fraction) in tract left posterior thalamic radiation (from dMRI data)
GCST90003687	0	1	0	1	0	1	-0.0272106	0.857411	-0.255899	0.118316	-0.130773	0.357888	0.361486	0.134523	-0.361461	0.0525899	-0.613626	0.0357083	-0.254976	0.263219	-0.432793	0.377297	-0.0484437	0.604136	-0.0530059	0.586453	0.0779079	0.467847	aparc-a2009s_rh_thickness_G-cuneus	Mean thickness of G-cuneus in the right hemisphere generated by parcellation of the white surface using Destrieux (a2009s) parcellation
GCST90004073	-0.175989	0.0265253	-0.208511	0.18772	-0.141387	0.153677	-0.0847573	0.236261	-0.375224	0.00673557	0.113877	0.342109	0.10389	0.603084	-0.298101	0.0577097	-0.16459	0.503643	-0.218579	0.263877	-0.248968	0.419254	-0.102286	0.0300496	-0.0983266	0.0909632	0.0251308	0.778733	IDP_dMRI_TBSS_MD_Tapetum_R	Mean MD (mean diffusivity) in tapetum (right) on FA (fractional anisotropy) skeleton (from dMRI data)
GCST90004389	0.00375932	0.932093	0.0055953	0.916206	-0.00095738	0.982565	0.0745977	0.00924596	0.120377	0.0544862	-0.0421742	0.363302	-0.0639988	0.394491	-0.0605938	0.32168	-0.0913924	0.395616	-0.0871204	0.267664	-0.0518623	0.704711	0.042799	0.124198	0.0666692	0.0229473	5.42641e-05	0.998834	IDP_dMRI_ProbtrackX_ICVF_ilf_l	Weighted-mean ICVF (intra-cellular volume fraction) in tract left inferior longitudinal fasciculus (from dMRI data)
GCST90004348	-0.0440547	0.313422	-0.0345106	0.430791	-0.0529846	0.358039	0.0587987	0.145171	0.10731	0.0378058	-0.0296406	0.579505	-0.0137731	0.854147	-0.0940805	0.110031	-0.147317	0.216896	-0.0804328	0.268078	-0.154225	0.317327	0.0467705	0.11362	0.0506321	0.17175	0.020041	0.581426	IDP_dMRI_TBSS_ICVF_Retrolenticular_part_of_internal_capsule_L	Mean ICVF (intra-cellular volume fraction) in retrolenticular part of internal capsule (left) on FA (fractional anisotropy) skeleton (from dMRI data)
GCST90003606	-0.215838	0.02842	-0.391949	0.00787094	-0.0906575	0.591234	-0.135013	0.275884	-0.136989	0.635723	0.0769283	0.638303	-0.1751	0.525931	0.17686	0.309369	0.36972	0.176118	0.239417	0.268354	0.556957	0.1022	-0.13176	0.0682303	-0.168033	0.0838373	0.00352511	0.974159	aparc-a2009s_lh_thickness_G+S-subcentral	Mean thickness of G+S-subcentral in the left hemisphere generated by parcellation of the white surface using Destrieux (a2009s) parcellation
GCST90004366	-0.00147765	0.972033	-0.00346075	0.952388	-0.0106424	0.832007	0.0861271	0.049154	0.0440734	0.527128	-0.0221304	0.732773	0.123908	0.194567	-0.0826309	0.413328	0.109372	0.458592	-0.149366	0.270011	0.0789335	0.70633	0.0547583	0.172003	0.0679135	0.114158	0.0764747	0.104868	IDP_dMRI_TBSS_ICVF_Fornix_cres+Stria_terminalis_L	Mean ICVF (intra-cellular volume fraction) in fornix cres+stria terminalis (left) on FA (fractional anisotropy) skeleton (from dMRI data)
GCST90002889	-0.146521	0.138022	-0.244794	0.0260004	-0.0936323	0.315079	-0.0176743	0.821964	0.177561	0.289049	0.0109029	0.918787	-0.0848542	0.633525	0.0596155	0.576154	0.10413	0.538868	0.145217	0.273275	-0.165647	0.42564	0.0516411	0.280303	0.0218738	0.674879	0.127695	0.107644	aparc-DKTatlas_lh_volume_superiorparietal	Volume of superiorparietal in the left hemisphere generated by parcellation of the white surface using DKT parcellation
GCST90002796	-0.177601	0.0307204	-0.277703	0.0040246	-0.12018	0.140035	-0.0240816	0.76364	0.192667	0.298434	0.0361677	0.736575	-0.0772476	0.666	0.0768276	0.480525	0.109121	0.528037	0.148175	0.273434	-0.174575	0.410883	0.0582861	0.223899	0.016188	0.75931	0.150722	0.0589526	aparc-Desikan_lh_volume_superiorparietal	Volume of superiorparietal in the left hemisphere generated by parcellation of the white surface using Desikan-Killiany parcellation
GCST90002863	-0.00682598	0.97159	-0.0625602	0.678642	0.0590793	0.80581	-0.0454214	0.647991	0.183017	0.337647	-0.344747	0.0381362	-0.259733	0.442076	0.283016	0.411914	0.286018	0.602576	0.457952	0.275201	0.135999	0.844111	0.0130589	0.843255	0.0422605	0.609518	-0.240936	0.0551936	aparc-DKTatlas_lh_volume_caudalanteriorcingulate	Volume of caudalanteriorcingulate in the left hemisphere generated by parcellation of the white surface using DKT parcellation
GCST90004145	-0.108352	0.312775	-0.111143	0.375531	-0.0935974	0.360376	-0.120428	0.239524	-0.13956	0.356687	-0.207197	0.0736086	-0.0326534	0.839967	0.200068	0.248206	0.325864	0.111697	0.202415	0.275374	0.333602	0.138108	-0.130795	0.186215	-0.124835	0.261005	-0.183321	0.0188562	IDP_dMRI_TBSS_L2_Anterior_corona_radiata_R	Mean L2 in anterior corona radiata (right) on FA (fractional anisotropy) skeleton (from dMRI data)
GCST90003596	0.0514239	0.671159	-0.0194864	0.914447	0.0993793	0.5107	-0.0125119	0.937165	-0.58742	0.0270581	-0.193581	0.538015	-0.299831	0.532754	-0.24834	0.225608	-0.517769	0.109507	-0.27689	0.277267	-0.751901	0.0629289	-0.137409	0.240969	-0.137731	0.253234	-0.121973	0.465851	aparc-DKTatlas_rh_thickness_rostralmiddlefrontal	Mean thickness of rostralmiddlefrontal in the right hemisphere generated by parcellation of the white surface using DKT parcellation
GCST90002678	0.0215237	0.82785	0.150342	0.510682	-0.0855708	0.639101	-0.0545994	0.468857	0.444737	0.00738461	0.0394123	0.796718	0.0773329	0.747109	-0.12794	0.72509	0.699572	0.024258	-0.338487	0.27728	0.657012	0.0322707	0.00960368	0.866598	-0.0648784	0.411274	0.101926	0.39559	HippSubfield_lh_volume_molecular-layer-HP-body	Volume of molecular-layer-HP-body in the left hemisphere generated by subcortical volumetric sub-segmentation of the Hippocampal Subfields
GCST90002829	-0.170922	0.0878513	-0.262732	0.0254436	-0.122546	0.239788	-0.0743768	0.258763	0.258317	0.0792879	0.319965	0.0870677	-0.0801966	0.704287	0.232604	0.12128	0.210398	0.364611	0.201325	0.278853	-0.122816	0.672747	0.0298222	0.550492	-0.0123538	0.841093	0.217098	0.0208889	aparc-Desikan_rh_volume_superiorparietal	Volume of superiorparietal in the right hemisphere generated by parcellation of the white surface using Desikan-Killiany parcellation
GCST90003907	0.0706787	0.34607	-0.0605953	0.589205	0.155507	0.0971617	0.138393	0.0288097	0.200206	0.176073	-0.147978	0.353369	-0.178025	0.381223	-0.350063	0.0700939	-0.381821	0.509708	-0.256202	0.279212	-0.336688	0.54908	0.0920592	0.0915317	0.125321	0.0345928	-0.0722716	0.424055	IDP_dMRI_TBSS_FA_Sagittal_stratum_R	Mean FA (fractional anisotropy) in sagittal stratum (right) on FA skeleton (from dMRI data)
GCST90003922	-0.0680624	0.336834	-0.156408	0.140199	-0.00640777	0.942243	-0.0535757	0.509949	-0.0882244	0.496008	-0.0999876	0.506407	-0.178103	0.338921	-0.215399	0.144313	-0.724939	0.00396055	0.195685	0.281131	-0.490195	0.0925775	-0.0821626	0.2103	-0.0758019	0.236718	-0.117661	0.157138	IDP_dMRI_TBSS_FA_Uncinate_fasciculus_L	Mean FA (fractional anisotropy) in uncinate fasciculus (left) on FA skeleton (from dMRI data)
GCST90003926	0.0905158	0.229374	-0.0343853	0.760212	0.17397	0.0644919	0.167681	0.00835259	0.130874	0.435752	-0.137536	0.257207	-0.16547	0.417834	-0.260079	0.158662	-0.351443	0.369347	-0.237608	0.281304	-0.415963	0.271389	0.100702	0.0366546	0.159311	0.00748741	-0.0270498	0.765802	IDP_dMRI_ProbtrackX_FA_ar_r	Weighted-mean FA (fractional anisotropy) in tract right acoustic radiation (from dMRI data)
GCST90004045	-0.0202701	0.769623	0.11903	0.25041	-0.114195	0.186719	-0.212845	0.000482881	-0.288563	0.0223847	0.106869	0.309852	-0.153312	0.43005	0.345063	0.112525	0.387283	0.419148	0.283867	0.283073	0.261297	0.616395	-0.163867	0.0145743	-0.173602	0.0100206	-0.0179012	0.819097	IDP_dMRI_TBSS_MD_Posterior_limb_of_internal_capsule_R	Mean MD (mean diffusivity) in posterior limb of internal capsule (right) on FA (fractional anisotropy) skeleton (from dMRI data)
MeanHippocampus_Combined_GenomeControlled_Jan23.tbl	-0.00046244	0.0979412	-0.000212657	0.60073	-0.000653994	0.032239	-3.80904e-05	0.878777	-0.000421096	0.338017	-0.000655082	0.0925621	-0.000791342	0.217727	0.000950303	0.0837956	0.0010882	0.209363	0.00129896	0.283173	0.000684995	0.531636	-0.000295377	0.119971	0	1	0	1	NA	NA
GCST90004191	0.00904321	0.934137	0.0994669	0.274315	-0.0557752	0.736619	-0.0553302	0.387182	-0.126893	0.223697	0.0201327	0.870679	0.0485463	0.747146	0.162054	0.442704	0.307694	0.309804	0.199365	0.284482	0.411781	0.142924	-0.0399123	0.373894	-0.0985911	0.0421198	-0.00866079	0.91743	IDP_dMRI_TBSS_L3_Retrolenticular_part_of_internal_capsule_R	Mean L3 in retrolenticular part of internal capsule (right) on FA (fractional anisotropy) skeleton (from dMRI data)
GCST90003372	0.343679	0.00470794	0.373832	0.0232811	0.304339	0.0265763	0.15318	0.170906	0.422534	0.223166	-0.166972	0.726406	0.343685	0.397477	0.316231	0.164145	0.649663	0.0743205	0.302621	0.28562	0.854564	0.061728	0.181661	0.278808	0.22231	0.114254	0.0809329	0.824955	aparc-a2009s_rh_area_G+S-occipital-inf	Area of G+S-occipital-inf in the right hemisphere generated by parcellation of the white surface using Destrieux (a2009s) parcellation
Mean_precentral_surfavg_20190429_noGC	0.000265963	0.0276464	0.000353265	0.0344308	0.000224018	0.101648	-2.3824e-05	0.849716	7.96777e-05	0.737484	-0.000250363	0.0951061	0.000426146	0.164394	0.00012512	0.495053	-2.7967e-05	0.923296	0.000239478	0.291019	0.000262031	0.470566	-1.79394e-06	0.987801	-2.57658e-05	0.837151	-0.000133124	0.393912	NA	NA
Mean_superiortemporal_surfavg_20190429_noGC	0.000126081	0.572372	-0.000104256	0.719934	0.00026263	0.288735	-4.37675e-05	0.830266	0.000354001	0.280873	-0.000600529	0.00892179	0.000233388	0.675139	-0.00025945	0.400782	-7.8077e-05	0.868453	-0.00039201	0.291744	0.000215028	0.717181	6.9599e-06	0.972658	3.03061e-05	0.912532	-6.84218e-06	0.984906	NA	NA
GCST90002554	-0.0112307	0.968118	-0.291525	0.190355	0.227802	0.587415	-0.10737	0.749153	-0.326834	0.346924	-0.117921	0.518328	-0.138506	0.746937	0.196702	0.30604	0.599628	0.0335641	0.232227	0.294988	0.819015	0.0210509	-0.244316	0.325644	-0.234981	0.304293	-0.213309	0.310003	IDP_T1_FAST_ROIs_R_pallidum	Volume of grey matter in Right Pallidum
GCST90004600	-0.108467	0.29779	-0.10213	0.512462	-0.111345	0.391899	-0.0738246	0.711552	-0.100999	0.573744	-0.00126566	0.995314	-0.158527	0.545071	-0.362367	0.0287763	-0.509636	0.0742132	-0.2158	0.296552	-0.662122	0.04073	0.00833127	0.932814	0.040606	0.876682	0.0163131	0.888395	rfMRI amplitudes (ICA100 node 12)
GCST90004364	0.0356367	0.460035	0.00448838	0.938434	0.0524732	0.358459	0.115737	0.00217081	0.113564	0.209121	-0.0835801	0.16204	-0.031078	0.803068	-0.094145	0.249199	-0.0640322	0.646608	-0.10521	0.297239	0.0771342	0.651068	0.0726307	0.0610813	0.101999	0.02199	-0.0107332	0.823318	IDP_dMRI_TBSS_ICVF_Cingulum_hippocampus_L	Mean ICVF (intra-cellular volume fraction) in cingulum hippocampus (left) on FA (fractional anisotropy) skeleton (from dMRI data)
GCST90003556	0	1	0	1	0	1	-0.284206	0.0365033	-0.383518	0.321714	-0.448042	0.0384261	-0.573663	0.323842	-0.580597	0.0216731	-0.738845	0.0613848	-0.324757	0.297592	-0.966259	0.0507534	-0.362969	7.76734e-06	-0.354881	0.000451038	-0.456834	0.0239138	aparc-DKTatlas_lh_thickness_parsopercularis	Mean thickness of parsopercularis in the left hemisphere generated by parcellation of the white surface using DKT parcellation
GCST90004283	-0.0165349	0.885606	0.0886671	0.579371	-0.0815007	0.425015	-0.10181	0.0761582	0.0108829	0.931957	0.327102	0.00632265	-0.013369	0.942282	-0.181372	0.179426	-0.207667	0.325964	-0.174381	0.298324	-0.0884441	0.73854	-0.0451186	0.300724	-0.0532072	0.323164	0.121019	0.138978	IDP_dMRI_ProbtrackX_L2_fma	Weighted-mean L2 in tract forceps major (from dMRI data)
GCST90004152	-0.0633647	0.371279	0.0593811	0.575428	-0.142657	0.107271	-0.130534	0.0302636	-0.178347	0.252214	0.152592	0.274714	0.166234	0.390151	0.333088	0.125844	0.331557	0.58874	0.244224	0.301562	0.288385	0.626585	-0.0830865	0.158341	-0.114914	0.0469165	0.0717662	0.4043	IDP_dMRI_TBSS_L2_Posterior_thalamic_radiation_L	Mean L2 in posterior thalamic radiation (left) on FA (fractional anisotropy) skeleton (from dMRI data)
GCST90004062	0.0148278	0.854555	0.0609334	0.365325	-0.0167898	0.868505	-0.0802132	0.206136	-0.25099	0.00557114	0.0739182	0.288668	0.0381143	0.791545	0.100676	0.305561	0.145004	0.357819	0.124465	0.301575	0.00688401	0.973247	-0.0594932	0.38076	-0.103966	0.0975709	0.0107636	0.877726	IDP_dMRI_TBSS_MD_Cingulum_cingulate_gyrus_L	Mean MD (mean diffusivity) in cingulum cingulate gyrus (left) on FA (fractional anisotropy) skeleton (from dMRI data)
GCST90002567	-0.123956	0.0536056	-0.190331	0.0165811	-0.0470793	0.55283	0.0164762	0.775756	0.145712	0.232205	-0.0141002	0.892364	-0.0666864	0.702766	0.00460919	0.964346	0.136475	0.446787	-0.163896	0.305949	0.097526	0.650261	0.0206647	0.741125	0.0907241	0.160299	-0.0286966	0.815259	IDP_T1_FAST_ROIs_V_cerebellum_VI	Volume of grey matter in Vermis VI Cerebellum
GCST90004292	-0.0734998	0.37652	0.0700649	0.573093	-0.166235	0.109525	-0.152904	0.0306757	-0.206538	0.26714	0.181692	0.259764	0.194341	0.392234	0.390426	0.140854	0.380479	0.604542	0.286399	0.306697	0.329787	0.642111	-0.0964757	0.172259	-0.133862	0.0558501	0.0848809	0.400938	IDP_dMRI_ProbtrackX_L2_ptr_l	Weighted-mean L2 in tract left posterior thalamic radiation (from dMRI data)
GCST90002497	0.0433395	0.335892	0.0913362	0.371557	0.0191392	0.70244	0.0299662	0.537165	0.0249401	0.734375	-0.0115567	0.885449	-0.048337	0.685102	0.162393	0.0909037	0.122865	0.391032	0.127511	0.310408	0.068052	0.705413	0.00204476	0.963061	-0.0131065	0.800023	-0.109086	0.0340728	IDP_T1_FAST_ROIs_L_intracalc_cortex	Volume of grey matter in Left Intracalcarine Cortex
GCST90003042	0.0939574	0.0390806	0.0900054	0.318337	-0.0183915	0.862399	0.0166114	0.750411	-0.0297008	0.771944	-0.0040025	0.965872	-0.0877192	0.529777	0.021971	0.855687	0.111915	0.50811	-0.113953	0.310955	0.187432	0.276242	-0.0610005	0.383489	-0.00744486	0.881103	-0.0418922	0.484317	aparc-a2009s_rh_volume_S-calcarine	Volume of S-calcarine in the right hemisphere generated by parcellation of the white surface using Destrieux (a2009s) parcellation
GCST90003218	0.289489	0.236508	0.179339	0.52158	0.342209	0.0683398	0.222005	0.525971	0.771855	0.000337207	0.0973575	0.689155	0.406782	0.457835	0.0474246	0.850223	0.14726	0.726931	0.310309	0.314047	-0.0133326	0.98405	0.321743	0.214618	0.306273	0.180328	0.151073	0.671105	BA-exvivo_lh_area_MT	Area of MT in the left hemisphere generated by parcellation of the white surface using BA_exvivo parcellation
GCST90004336	0.0829549	0.248552	-0.0658282	0.568534	0.172276	0.0309961	0.108259	0.241004	0.0848364	0.434855	-0.1893	0.0435676	0.142445	0.473896	-0.101339	0.52117	-0.105991	0.511467	-0.143446	0.315528	-0.193771	0.33179	0.0699205	0.455745	0.107281	0.198427	-0.038685	0.737306	IDP_dMRI_TBSS_ICVF_Medial_lemniscus_L	Mean ICVF (intra-cellular volume fraction) in medial lemniscus (left) on FA (fractional anisotropy) skeleton (from dMRI data)
GCST90003823	0.0724983	0.282982	0.0332829	0.676296	0.087194	0.357599	0.108828	0.0650129	-0.0772205	0.371598	-0.0197753	0.868173	0.045198	0.719595	-0.0780658	0.396232	-0.312944	0.0299899	-0.114205	0.317304	-0.332546	0.0827085	0.0532745	0.299305	0.0974557	0.045818	-0.00387403	0.966551	wg_lh_intensity-contrast_frontalpole	Grey-white contrast in frontalpole in the left hemisphere calculated as a percentage of the mean gray-white matter intensity from Desikan-Killiany parcellation
GCST90003901	0.0979389	0.265142	0.101016	0.442655	0.10126	0.356341	0.0988277	0.132305	0.0748784	0.639569	0.0415748	0.740807	0.166065	0.42862	-0.347554	0.0445081	-0.508783	0.0342442	-0.188766	0.318072	-0.417821	0.166543	0.118388	0.0172751	0.161508	0.0155207	-0.020298	0.841546	IDP_dMRI_TBSS_FA_Superior_corona_radiata_R	Mean FA (fractional anisotropy) in superior corona radiata (right) on FA skeleton (from dMRI data)
GCST90004633	-0.0861445	0.503171	0.0727057	0.712407	-0.186943	0.244486	-0.106051	0.592619	-0.0705589	0.749282	0.0811362	0.670835	-0.0463347	0.885273	-0.413873	0.0320643	-0.882131	0.00351629	-0.240154	0.320621	-0.788526	0.0370241	0.0301316	0.796725	0.044358	0.856587	0.0560468	0.692789	rfMRI amplitudes (ICA100 node 45)
GCST90004047	0.0227479	0.83615	0.10357	0.234862	-0.0321936	0.832056	-0.0800059	0.0663193	-0.101623	0.292844	0.0132397	0.905277	-0.0872559	0.531789	0.13384	0.512289	0.28112	0.343505	0.145582	0.322812	0.360233	0.199108	-0.0525731	0.129939	-0.0885516	0.0346729	-0.0415035	0.616131	IDP_dMRI_TBSS_MD_Retrolenticular_part_of_internal_capsule_R	Mean MD (mean diffusivity) in retrolenticular part of internal capsule (right) on FA (fractional anisotropy) skeleton (from dMRI data)
GCST90004313	0.0173206	0.694721	0.0270112	0.658538	0.00581835	0.921147	-0.135033	0.0052734	-0.207834	0.0062751	0.0398622	0.573511	0.11792	0.282131	0.0913685	0.512789	0.186141	0.390458	0.125582	0.323044	0.213391	0.36701	-0.0990198	0.00756137	-0.124589	0.000826928	0.0205067	0.703099	IDP_dMRI_ProbtrackX_L3_ifo_r	Weighted-mean L3 in tract right inferior fronto-occipital fasciculus (from dMRI data)
GCST90004434	0.107213	0.126617	0.0907366	0.300893	0.110955	0.195996	0.0548471	0.428001	0.123287	0.179965	-0.209834	0.0087192	0.102107	0.569321	-0.0744064	0.429229	0.0812542	0.658664	-0.114628	0.325732	-0.00833028	0.966764	0.0113373	0.864333	0.0203268	0.762315	-0.0789892	0.294032	IDP_dMRI_TBSS_OD_External_capsule_R	Mean OD (orientation dispersion index) in external capsule (right) on FA (fractional anisotropy) skeleton (from dMRI data)
GCST90003320	0	1	-0.618963	0.108635	0	1	0	1	-0.618824	0.258143	0.686861	0.000541514	-0.265782	0.430833	-0.20285	0.381831	-0.0301855	0.963087	-0.243215	0.327271	0.0211951	0.956605	-0.481175	0.406288	0	1	0.43385	0.00384493	aparc-a2009s_lh_area_G-orbital	Area of G-orbital in the left hemisphere generated by parcellation of the white surface using Destrieux (a2009s) parcellation
GCST90004428	0.19303	0.309253	0.0627527	0.754012	0.273758	0.138672	0.273018	0.0177874	0.00255582	0.990009	0.12266	0.305961	0.22306	0.422074	0.0987165	0.435906	0.105392	0.600792	0.152934	0.329178	0.320311	0.206306	0.197746	0.121188	0.197898	0.0560903	0.0279303	0.869117	IDP_dMRI_TBSS_OD_Posterior_corona_radiata_R	Mean OD (orientation dispersion index) in posterior corona radiata (right) on FA (fractional anisotropy) skeleton (from dMRI data)
GCST90004151	-0.0732964	0.266254	0.068572	0.486978	-0.169314	0.0398836	-0.120329	0.029775	-0.193085	0.117749	0.0469549	0.810304	0.16032	0.366718	0.302136	0.0615996	0.311094	0.388269	0.192677	0.333261	0.154639	0.685544	-0.0771416	0.0661988	-0.0943458	0.0687612	0.044247	0.575556	IDP_dMRI_TBSS_L2_Posterior_thalamic_radiation_R	Mean L2 in posterior thalamic radiation (right) on FA (fractional anisotropy) skeleton (from dMRI data)
GCST90003293	0.155696	0.31747	0.0882258	0.562868	0.187393	0.316767	0.315285	0.030797	0.623063	0.00123092	0.479783	0.101827	0.0257806	0.924584	-0.061101	0.766185	-0.00227842	0.994375	-0.242382	0.338973	-0.225457	0.717231	0.37883	4.87654e-05	0.337228	0.000767234	0.360504	0.0174501	aparc-DKTatlas_rh_area_superiortemporal	Area of superiortemporal in the right hemisphere generated by parcellation of the white surface using DKT parcellation
Mean_Full_SurfArea_20190429_noGC	8.12769e-06	0.194814	1.26139e-05	0.0293032	5.43209e-06	0.459741	4.54684e-06	0.3071	8.27056e-06	0.32551	-1.10413e-06	0.858386	8.94349e-06	0.335794	9.84659e-06	0.162742	7.8039e-06	0.475254	8.76885e-06	0.338982	1.29984e-05	0.328556	3.20507e-06	0.491289	2.86198e-06	0.536183	6.38649e-06	0.301306	NA	NA
GCST90006347	0.161483	0.179871	0.167599	0.34302	0.158023	0.222694	-0.145952	0.0210941	0.144543	0.337004	0.172999	0.351175	0.13726	0.494939	-0.205687	0.356974	-0.199098	0.328015	-0.232547	0.34749	-0.0121754	0.961971	-0.0273536	0.643284	-0.109496	0.0963718	0.207933	0.164319	QC_T1-to-standard_nonlinear_alignment_warping	Amount of warping (averaged distortion) applied to nonlinearly align the T1 brain image to standard-space
GCST90005702	0.0102214	0.933463	0.506125	0.00551979	-0.337154	0.0284178	0	1	0	1	0	1	0	1	0.173568	0.0582964	0.283373	0.200669	0.100447	0.348674	0.230793	0.103417	0	1	0	1	0	1	rfMRI connectivity (ICA100 edge 849)
GCST90005893	0.0165275	0.870642	-0.00894073	0.960622	0.029164	0.766672	-0.0698558	0.495542	0.0556954	0.752243	-0.219665	0.127351	0.0815245	0.674916	0.193298	0.045955	0.378894	0.0123857	0.113111	0.348898	0.5702	0.00263279	-0.0643608	0.409599	-0.00233488	0.980307	-0.203196	0.0630466	rfMRI connectivity (ICA100 edge 1040)
GCST90003840	0.00306609	0.954238	-0.0383306	0.587768	0.0274436	0.726962	0.0555112	0.244564	-0.0169773	0.796811	0.0112765	0.883494	0.0747389	0.437803	-0.0611276	0.390652	-0.204265	0.121582	-0.0792911	0.350013	-0.311384	0.0372787	0.0219461	0.621221	0.0439963	0.348781	-0.0119679	0.829832	wg_rh_intensity-contrast_medialorbitofrontal	Grey-white contrast in medialorbitofrontal in the right hemisphere calculated as a percentage of the mean gray-white matter intensity from Desikan-Killiany parcellation
GCST90003678	-0.461836	0.0221667	-0.245226	0.71843	-0.574601	0.00596796	-0.250014	0.0144179	-0.670071	0.00276615	-0.276824	0.154017	-0.19324	0.770524	-0.464884	0.0845245	-0.857313	0.0467554	-0.311724	0.352317	-0.69796	0.317914	-0.287469	0.0117318	-0.303108	0.00996393	-0.219725	0.428126	aparc-a2009s_rh_thickness_G+S-occipital-inf	Mean thickness of G+S-occipital-inf in the right hemisphere generated by parcellation of the white surface using Destrieux (a2009s) parcellation
GCST90002724	0	1	0.0283345	0.87235	0.240076	0.102466	0.0145667	0.85298	-0.067732	0.696831	-0.0818212	0.586989	0.113792	0.653406	-0.710644	0.0742539	-1.22259	0.0498916	-0.439511	0.353118	-2.51656	0.00129261	0.0329352	0.581838	0.169665	0.0767811	0.132355	0.364	ThalamNuclei_lh_volume_MDl	Volume of MDl in the left hemisphere generated by subcortical volumetric sub-segmentation of the Thalamic Nuclei
GCST90003538	-0.441237	0.0267294	-0.227759	0.72844	-0.553524	0.00582048	-0.237012	0.0147636	-0.634046	0.00290004	-0.262483	0.155186	-0.174248	0.783055	-0.447153	0.0844307	-0.824054	0.0467841	-0.298587	0.353897	-0.664325	0.328041	-0.271822	0.015825	-0.28667	0.0136726	-0.20501	0.442455	BA-exvivo_rh_thickness_MT	Mean thickness of MT in the right hemisphere generated by parcellation of the white surface using BA_exvivo parcellation
GCST90003165	-0.0186843	0.895246	-0.0436442	0.744896	-0.0270447	0.855264	0.00759736	0.917436	0.29017	0.189682	0.313285	0.104375	-0.154603	0.513686	0.346189	0.0802372	0.673484	0.0297082	0.280912	0.354056	1.00016	0.0746767	0.0197001	0.723803	-0.0196682	0.808871	0.215106	0.0805064	aparc-pial_lh_area_precuneus	Area of precuneus in the left hemisphere generated by parcellation of the pial surface using Desikan-Killiany parcellation
GCST90002968	0.0311495	0.609421	0.168056	0.0102602	-0.0455272	0.549883	-0.0550796	0.226871	-0.0233461	0.767282	-0.115311	0.116816	0.0292585	0.858054	0.121549	0.118006	0.233258	0.0638022	0.101714	0.354704	0.313449	0.0407973	-0.0508582	0.109092	-0.0405449	0.378617	-0.0725677	0.17222	aparc-a2009s_lh_volume_S-calcarine	Volume of S-calcarine in the left hemisphere generated by parcellation of the white surface using Destrieux (a2009s) parcellation
GCST90004507	-0.0921582	0.0947842	-0.100174	0.224996	-0.0832868	0.231455	0.0491521	0.290015	0.250703	0.0137833	0.12328	0.294662	-0.20154	0.175382	-0.0334342	0.851199	0.023356	0.901163	-0.201581	0.354762	-0.0872221	0.712478	0.0582078	0.0935164	0.0406387	0.374514	-0.0157944	0.867022	IDP_dMRI_TBSS_ISOVF_Sagittal_stratum_R	Mean ISOVF (isotropic or free water volume fraction) in sagittal stratum (right) on FA (fractional anisotropy) skeleton (from dMRI data)
GCST90004447	0.120312	0.196856	0.153016	0.197518	0.074786	0.525354	0.0313225	0.64104	0.0361964	0.800257	-0.285079	0.0215172	0.0681629	0.811847	-0.115609	0.462528	-0.0903989	0.776625	-0.169367	0.356199	-0.226814	0.578651	-0.0395841	0.419669	-0.0349161	0.64114	-0.134045	0.263709	IDP_dMRI_TBSS_OD_Uncinate_fasciculus_L	Mean OD (orientation dispersion index) in uncinate fasciculus (left) on FA (fractional anisotropy) skeleton (from dMRI data)
GCST90004581	-0.180243	0.137576	-0.102243	0.573481	-0.225109	0.140498	-0.138473	0.357572	-0.119958	0.565228	-0.0620603	0.814037	0.165531	0.74289	-0.429211	0.0245484	-0.837046	0.00501089	-0.219591	0.356746	-0.897198	0.0162639	-0.0184639	0.79651	0.0157345	0.939877	0.00253011	0.98495	rfMRI amplitudes (ICA25 node 14)
GCST90003399	0.0815534	0.131187	0.149151	0.0652804	0.04002	0.552735	-0.0456616	0.425069	-0.220648	0.0325792	-0.0418361	0.633641	0.256533	0.0740529	0.0365859	0.654942	-0.0502616	0.698842	0.0932915	0.359164	0.0327739	0.849831	-0.0299718	0.62812	-0.0206268	0.815537	-0.0104826	0.927893	aparc-a2009s_rh_area_G-precentral	Area of G-precentral in the right hemisphere generated by parcellation of the white surface using Destrieux (a2009s) parcellation
GCST90004595	-0.168298	0.131314	-0.0930176	0.57727	-0.211461	0.128905	-0.122714	0.390267	-0.115047	0.549156	-0.0653687	0.786088	0.168138	0.714278	-0.392677	0.0260274	-0.770707	0.0051782	-0.201626	0.359779	-0.825005	0.0168412	-0.0149593	0.820498	0.0209974	0.912656	-0.000962671	0.99378	rfMRI amplitudes (ICA100 node 7)
GCST90002741	-0.108052	0.422355	-0.306591	0.388843	0.0287135	0.864242	0.129132	0.225759	-0.266168	0.298696	-0.449745	0.112498	0.244853	0.47465	0.536026	0.0378971	0.465009	0.251311	0.35345	0.361083	0.0602249	0.905941	0.0579849	0.479839	0	1	0	1	ThalamNuclei_rh_volume_VPL	Volume of VPL in the right hemisphere generated by subcortical volumetric sub-segmentation of the Thalamic Nuclei
GCST90004319	-0.134668	0.206277	-0.0183056	0.892164	-0.201674	0.0261422	-0.153991	0.0124137	-0.169637	0.215301	0.110269	0.432585	0.202371	0.307615	0.285488	0.251271	0.257455	0.619138	0.230791	0.361214	0.178194	0.738261	-0.0987037	0.0346083	-0.130896	0.0235959	0.0750822	0.393943	IDP_dMRI_ProbtrackX_L3_ptr_l	Weighted-mean L3 in tract left posterior thalamic radiation (from dMRI data)
GCST90003927	0.108761	0.16529	-0.021082	0.857329	0.184297	0.0597945	0.210898	0.000875122	0.334353	0.0426814	-0.110032	0.418858	-0.00706987	0.976012	-0.298966	0.0724377	-0.523664	0.158606	-0.186924	0.362679	-0.540061	0.148099	0.173605	0.0513926	0.208839	0.0126444	-0.0105714	0.908433	IDP_dMRI_ProbtrackX_FA_atr_l	Weighted-mean FA (fractional anisotropy) in tract left anterior thalamic radiation (from dMRI data)
GCST90002946	0.183796	0.024989	0.175706	0.152204	0.166173	0.104249	0.019869	0.756266	0.207775	0.142786	-0.1289	0.470906	-0.196893	0.336604	0.0596331	0.654782	0.0951412	0.664954	0.151836	0.362732	0.340051	0.195253	0.0409952	0.398792	0.0955695	0.153082	-0.0503353	0.600374	aparc-a2009s_lh_volume_G-oc-temp-med-Lingual	Volume of G-oc-temp-med-Lingual in the left hemisphere generated by parcellation of the white surface using Destrieux (a2009s) parcellation
GCST90004498	-0.151801	0.321645	-0.0309174	0.848903	-0.240276	0.0760896	0.133014	0.301225	0.413992	0.0349318	0.0923432	0.679111	-0.515479	0.314054	-0.188453	0.35619	-0.0228584	0.943085	-0.370866	0.363469	0.163912	0.708758	0.0883245	0.202187	0.0369413	0.720986	-0.1914	0.131902	IDP_dMRI_TBSS_ISOVF_Retrolenticular_part_of_internal_capsule_L	Mean ISOVF (isotropic or free water volume fraction) in retrolenticular part of internal capsule (left) on FA (fractional anisotropy) skeleton (from d
GCST90002644	0.204347	4.93255e-05	0.246897	0.00105848	0.190414	0.00243371	0.052198	0.190197	0.141239	0.110323	-0.0942737	0.293199	0.16176	0.206275	0.0750204	0.447708	0.100224	0.516878	0.10917	0.364126	0.0548049	0.777348	0.0633559	0.0575474	0.0222983	0.652493	-0.0207071	0.762932	aseg_rh_volume_VentralDC	Volume of VentralDC in the right hemisphere generated by subcortical volumetric segmentation (aseg)
GCST90004539	0.0479854	0.406888	0.0843932	0.186519	0.020302	0.772416	0.0653372	0.200258	0.140627	0.171556	0.0848515	0.181827	-0.139255	0.192508	0.105163	0.198166	0.0786789	0.622892	0.115259	0.36569	-0.00345167	0.983042	0.0732684	0.00578971	0.0484395	0.148774	-0.00387426	0.935399	IDP_dMRI_ProbtrackX_ISOVF_ilf_l	Weighted-mean ISOVF (isotropic or free water volume fraction) in tract left inferior longitudinal fasciculus (from dMRI data)
GCST90002780	0.144572	0.0254607	0.199152	0.034869	0.110723	0.159662	0.0273363	0.613365	0.14854	0.182765	-0.0267316	0.85444	-0.112564	0.571816	0.0869371	0.406419	0.227669	0.187078	0.11735	0.369065	0.484054	0.0190279	0.0147178	0.700318	0.0454187	0.387241	-0.0454947	0.479564	aparc-Desikan_lh_volume_lingual	Volume of lingual in the left hemisphere generated by parcellation of the white surface using Desikan-Killiany parcellation
GCST90003130	0.084014	0.0968531	0.127813	0.0669313	0.0356777	0.539291	-0.0400642	0.412484	-0.192272	0.0303803	-0.0355212	0.63818	0.22204	0.0724624	0.0301529	0.668457	-0.0409567	0.714088	0.0776615	0.37479	0.0345099	0.81596	-0.0277668	0.598237	-0.0207898	0.783432	-0.0140941	0.887184	aparc-Desikan_rh_area_precentral	Area of precentral in the right hemisphere generated by parcellation of the white surface using Desikan-Killiany parcellation
GCST90004311	-0.0122456	0.756136	0.00891726	0.879869	-0.0198372	0.687052	-0.121676	0.00317397	-0.114388	0.184632	0.0439419	0.540531	0.0336069	0.746052	0.103626	0.220339	0.159735	0.270623	0.092572	0.375485	0.149472	0.379681	-0.0831241	0.0124287	-0.0924711	0.025752	0.0106447	0.835728	IDP_dMRI_ProbtrackX_L3_fmi	Weighted-mean L3 in tract forceps minor (from dMRI data)
GCST90003427	0.240694	0.0278196	0.342722	0.0361914	0.182209	0.181694	0.0404085	0.657998	-0.000197935	0.999223	-0.338572	0.328862	-0.159125	0.59045	0.23769	0.332503	0.158016	0.682039	0.267736	0.37657	0.395892	0.414435	0.0602135	0.385333	0.0859147	0.314278	-0.168045	0.199262	aparc-a2009s_rh_area_S-oc-middle+Lunatus	Area of S-oc-middle+Lunatus in the right hemisphere generated by parcellation of the white surface using Destrieux (a2009s) parcellation
GCST90003580	-0.0649861	0.483945	0.0435284	0.795985	-0.149452	0.312559	-0.153943	0.0134305	-0.0429748	0.817672	-0.0409916	0.728219	0.0691888	0.814919	0.095213	0.642354	-0.0328161	0.917976	0.218389	0.37784	0.578228	0.154269	-0.0913314	0.0990523	-0.11322	0.0550212	0.091709	0.342849	aparc-DKTatlas_rh_thickness_lateraloccipital	Mean thickness of lateraloccipital in the right hemisphere generated by parcellation of the white surface using DKT parcellation
GCST90004204	-0.108769	0.0555107	-0.0413156	0.626884	-0.150103	0.0343809	-0.0452898	0.396774	0.0581965	0.654467	0.175543	0.0492039	-0.0924727	0.730738	0.210817	0.240798	0.0163443	0.934057	0.205533	0.379419	0.0883946	0.721597	-0.0206567	0.684972	-0.0358958	0.541283	0.0149418	0.889983	IDP_dMRI_TBSS_L3_External_capsule_L	Mean L3 in external capsule (left) on FA (fractional anisotropy) skeleton (from dMRI data)
GCST90003287	0.0685846	0.129464	0.124222	0.0667052	0.0351803	0.533051	-0.0385291	0.41826	-0.186535	0.0305363	-0.0341236	0.641747	0.214936	0.0733146	0.0288235	0.672778	-0.0388874	0.719753	0.0744121	0.380344	0.0338708	0.813662	-0.0270256	0.597095	-0.0203744	0.781296	-0.0147565	0.878275	aparc-DKTatlas_rh_area_precentral	Area of precentral in the right hemisphere generated by parcellation of the white surface using DKT parcellation
GCST90004092	-0.086942	0.361216	0.101378	0.47663	-0.202017	0.0892735	0.00925011	0.93451	-0.11845	0.705431	0.126399	0.532866	-0.509545	0.042293	0.109591	0.651037	0.246072	0.522377	0.257593	0.380686	0.187165	0.700818	-0.0452609	0.654512	-0.0805359	0.349163	-0.0852559	0.667053	IDP_dMRI_TBSS_L1_Anterior_limb_of_internal_capsule_L	Mean L1 in anterior limb of internal capsule (left) on FA (fractional anisotropy) skeleton (from dMRI data)
GCST90002873	0.140343	0.0432367	0.173586	0.0853667	0.112576	0.181193	0.000832872	0.98787	0.156773	0.158666	-0.0578351	0.669218	-0.0771468	0.687869	0.105273	0.351977	0.25253	0.21113	0.123087	0.382951	0.507851	0.0227771	0.00697826	0.854805	0.0364002	0.482258	-0.0551532	0.3907	aparc-DKTatlas_lh_volume_lingual	Volume of lingual in the left hemisphere generated by parcellation of the white surface using DKT parcellation
GCST90002763	-0.00606828	0.960944	-0.0242219	0.896113	-0.00397715	0.979491	0.0238242	0.846707	-0.468882	0.0310929	0.0269602	0.885653	-0.0519834	0.868884	0.0939734	0.634203	0.58217	0.0576302	-0.215637	0.383205	0.452459	0.239253	-0.0150457	0.839887	0.0343664	0.725926	0.108977	0.435648	ThalamNuclei_rh_volume_Whole-thalamus	Volume of Whole-thalamus in the right hemisphere generated by subcortical volumetric sub-segmentation of the Thalamic Nuclei
GCST90002997	0.223027	0.0279833	0.144055	0.342385	0.260142	0.0400296	0.0725924	0.329699	0.122264	0.454614	0.0184436	0.897196	-0.056121	0.815484	-0.106091	0.622571	-0.0618515	0.864473	-0.227978	0.383883	-0.27666	0.514683	0.029999	0.6249	0.0204801	0.771745	-0.190047	0.196234	aparc-a2009s_lh_volume_S-temporal-sup	Volume of S-temporal-sup in the left hemisphere generated by parcellation of the white surface using Destrieux (a2009s) parcellation
Mean_precuneus_thickavg_20200522_noGC	-0.0988968	0.888594	0.0897015	0.919098	-0.30366	0.696886	-0.900115	0.0493073	-1.03428	0.437331	0.278255	0.752215	1.14622	0.583214	-0.219621	0.890823	-1.7879	0.417604	1.51268	0.384105	-2.56431	0.313828	-0.498717	0.211759	-0.612709	0.259885	0.505812	0.530166	NA	NA
GCST90005510	-0.182459	0.139943	0.0667528	0.795233	-0.332008	0.0313321	-0.0716265	0.493975	-0.231815	0.618406	-0.23071	0.662972	-0.00502115	0.988144	0.0628621	0.754334	0.089363	0.775941	0.217712	0.384223	0.655227	0.0949941	-0.121021	0.265364	-0.152896	0.120369	-0.233109	0.474437	rfMRI connectivity (ICA100 edge 657)
GCST90003817	0.00233329	0.966734	-0.062843	0.389647	0.0405463	0.682309	0.0350006	0.437781	0.000314003	0.996749	-0.160777	0.0360281	0.00727775	0.948183	-0.074288	0.384906	-0.323266	0.0158859	-0.102676	0.384587	-0.371915	0.0268285	0.00120211	0.977674	0.0621257	0.157444	-0.0969161	0.153022	wg_lh_intensity-contrast_rostralanteriorcingulate	Grey-white contrast in rostralanteriorcingulate in the left hemisphere calculated as a percentage of the mean gray-white matter intensity from Desikan-Killiany parcellation
GCST90002655	0.191141	0.12812	0.444205	0.0180621	0.0114722	0.941714	-0.136503	0.195268	-0.276233	0.321367	-0.01119	0.969	0.146008	0.591574	0.152765	0.474956	0.323718	0.33059	0.358445	0.387082	-0.00460381	0.991246	-0.154495	0.0168115	-0.0858939	0.578164	-0.139045	0.532814	AmygNuclei_lh_volume_Corticoamygdaloid-transitio	Volume of Corticoamygdaloid-transitio in the left hemisphere generated by subcortical volumetric sub-segmentation of the Amygdala Nuclei
GCST90003073	-0.0794043	0.271398	0.00426126	0.968544	-0.140978	0.117555	0.158478	0.0820465	0.361669	0.00178108	0.101608	0.397905	0.127774	0.563986	0.147823	0.445352	0.535727	0.0754752	0.204146	0.38713	0.838845	0.0254446	0.172844	0.0418888	0.162999	0.101736	0.136472	0.210171	aparc-Desikan_lh_area_TotalSurface	Area of TotalSurface in the left hemisphere generated by parcellation of the white surface using Desikan-Killiany parcellation
MeanPutamen_Combined_GenomeControlled_Jan23.tbl	0.000222738	0.102697	0.000203811	0.244378	0.000243423	0.0957107	0.00014981	0.244239	0.000164794	0.549698	0.000318825	0.0700684	0.000236019	0.42428	0.000235	0.27015	0.000229321	0.660136	0.000227228	0.388342	0.000401453	0.478195	0.000165298	0.0274512	0.000165547	0.0541722	0.000335685	0.034499	NA	NA
GCST90003305	0.449382	0.0670248	0.299479	0.586153	0.533127	0.0121075	0.266055	0.0108858	0.72216	0.0015694	0.327622	0.098576	0.276631	0.638798	0.442627	0.111983	0.842582	0.058895	0.296474	0.391674	0.71074	0.330352	0.312653	0.00197554	0.316045	0.00712199	0.264648	0.277516	aparc-a2009s_lh_area_G-cingul-Post-dorsal	Area of G-cingul-Post-dorsal in the left hemisphere generated by parcellation of the white surface using Destrieux (a2009s) parcellation
GCST90003692	0.334221	0.0572906	0.334002	0.0462116	0.315082	0.120913	-0.223395	0.012864	-0.127246	0.544934	0.0182649	0.95045	-0.132907	0.792165	0.0279279	0.917376	0.0582917	0.895447	0.281268	0.394125	-0.00272358	0.995926	-0.209613	0.00890194	-0.146593	0.0837325	-0.198005	0.351348	aparc-a2009s_rh_thickness_G-front-sup	Mean thickness of G-front-sup in the right hemisphere generated by parcellation of the white surface using Destrieux (a2009s) parcellation
GCST90002562	-0.289927	0.0526353	-0.44095	0.00147659	-0.175667	0.531643	-0.00355736	0.98601	0.188364	0.203802	0.0498546	0.721536	-0.120302	0.615403	0.298026	0.0797005	0.721424	0.00691279	0.177663	0.394915	0.665864	0.140451	0.0216066	0.871538	0.092218	0.133532	-0.0636955	0.494767	IDP_T1_FAST_ROIs_L_cerebellum_I-IV	Volume of grey matter in Left I-IV Cerebellum
GCST90004126	-0.0208488	0.78571	0.0840662	0.463832	-0.0767066	0.475424	-0.222551	0.00377681	-0.150348	0.370083	-0.129906	0.323411	-0.234967	0.272371	0.123381	0.58844	0.0999776	0.738297	0.183281	0.395456	-0.0182238	0.958722	-0.140044	0.0824805	-0.142063	0.0927851	-0.115615	0.387575	IDP_dMRI_TBSS_L2_Body_of_corpus_callosum	Mean L2 in body of corpus callosum on FA (fractional anisotropy) skeleton (from dMRI data)
GCST90003506	0.290402	0.0276889	0.240749	0.125067	0.31233	0.0170783	-0.224977	0.00402061	-0.18761	0.280325	-0.137368	0.58662	0.0399685	0.914937	-0.110629	0.43327	-0.0710627	0.748827	-0.199144	0.396038	0.166776	0.547181	-0.173529	0.0105261	-0.141185	0.0554545	-0.163351	0.235877	aparc-Desikan_rh_thickness_superiorfrontal	Mean thickness of superiorfrontal in the right hemisphere generated by parcellation of the white surface using Desikan-Killiany parcellation
GCST90003346	0.111622	0.705551	0.11669	0.688988	0.0986789	0.720559	0.257577	0.0977545	0.12874	0.703971	0.112914	0.376013	0.549579	0.013169	0.139415	0.391384	0.26286	0.30773	0.170527	0.397496	0.377475	0.241751	0.263288	0.067382	0.351345	0.00331947	0.159504	0.43356	aparc-a2009s_lh_area_S-collat-transv-ant	Area of S-collat-transv-ant in the left hemisphere generated by parcellation of the white surface using Destrieux (a2009s) parcellation
GCST90004323	-0.0820314	0.540121	0.000870319	0.994436	-0.13127	0.376117	-0.0838388	0.44605	-0.268631	0.0418842	0.0960806	0.410039	0.0427668	0.867753	0.18528	0.213502	0.260827	0.251128	0.154789	0.402784	0.293872	0.290172	-0.105308	0.25963	-0.0481073	0.392608	0.0227892	0.847419	IDP_dMRI_ProbtrackX_L3_str_l	Weighted-mean L3 in tract left superior thalamic radiation (from dMRI data)
GCST90003431	0.0579857	0.693941	0.143552	0.355322	-0.0142926	0.917998	0.107655	0.270025	0.187021	0.394545	0.0367752	0.795124	0.156405	0.514455	-0.403402	0.101996	-0.793558	0.0408035	-0.251956	0.406006	-0.732152	0.133734	0.039725	0.677259	0.0993449	0.423496	0.0549364	0.606967	aparc-a2009s_rh_area_S-oc-temp-med+Lingual	Area of S-oc-temp-med+Lingual in the right hemisphere generated by parcellation of the white surface using Destrieux (a2009s) parcellation
GCST90002600	0.129783	0.0518905	0.122216	0.110761	0.134781	0.0499316	0.0732383	0.0307369	0.109781	0.238104	0.077094	0.235143	0.0592484	0.585407	0.111313	0.301093	-0.00307095	0.981743	0.0785845	0.406054	0.044434	0.784348	0.0976346	0.000526438	0.0931032	0.0238654	0.0777076	0.147896	aseg_global_volume_4th-Ventricle	Volume of 4th-Ventricle in the whole brain generated by subcortical volumetric segmentation (aseg)
GCST90004504	-0.00483465	0.951397	0.0204346	0.863286	-0.0290551	0.769277	-0.0374942	0.747621	0.290522	0.0301017	0.104053	0.377856	0.212612	0.243087	-0.134211	0.311465	-0.186916	0.366678	-0.137378	0.406367	-0.0963463	0.709951	0.0548356	0.43173	-0.02735	0.790533	0.142062	0.0751577	IDP_dMRI_TBSS_ISOVF_Posterior_corona_radiata_L	Mean ISOVF (isotropic or free water volume fraction) in posterior corona radiata (left) on FA (fractional anisotropy) skeleton (from dMRI data)
GCST90003229	-0.142395	0.0456345	-0.169309	0.112456	-0.120905	0.173806	-0.0151776	0.806154	-0.0332545	0.909023	-0.194073	0.431537	-0.150036	0.451216	0.100193	0.458585	0.0871565	0.680242	0.138941	0.408525	0.344668	0.190122	-0.0542826	0.462907	-0.0381357	0.51077	-0.131106	0.482973	BA-exvivo_rh_area_BA45	Area of BA45 in the right hemisphere generated by parcellation of the white surface using BA_exvivo parcellation
GCST90002658	-0.000325257	0.996876	0.100964	0.224573	-0.0763732	0.421006	0.00107107	0.988746	-0.248755	0.0467003	-0.0391623	0.630121	0.120592	0.376902	0.0142369	0.878529	-0.116136	0.427301	0.136916	0.408858	-0.309102	0.091887	-0.047907	0.517597	-0.0898143	0.466092	0.0181275	0.829186	AmygNuclei_rh_volume_Lateral-nucleus	Volume of Lateral-nucleus in the right hemisphere generated by subcortical volumetric sub-segmentation of the Amygdala Nuclei
GCST90002619	0.133136	0.00167274	0.0943603	0.196584	0.154731	0.00357002	0.00174567	0.974799	0.00253944	0.974847	0.00875736	0.921777	0.0182077	0.867355	0.190011	0.028598	0.218769	0.0789432	0.0906902	0.409244	0.312098	0.0444843	0.0381031	0.459336	0.0578457	0.266241	0.00466243	0.94857	aseg_lh_volume_Cerebellum-Cortex	Volume of Cerebellum-Cortex in the left hemisphere generated by subcortical volumetric segmentation (aseg)
GCST90004416	0.0674674	0.363701	0.0561928	0.614285	0.087933	0.255813	0.010341	0.839612	0.0875603	0.341507	0.075147	0.327074	-0.0445936	0.7327	-0.0683433	0.603207	-0.153903	0.418917	-0.121694	0.411324	-0.529918	0.0282277	0.00771677	0.805736	0.0251904	0.507781	0.028394	0.623948	IDP_dMRI_TBSS_OD_Cerebral_peduncle_R	Mean OD (orientation dispersion index) in cerebral peduncle (right) on FA (fractional anisotropy) skeleton (from dMRI data)
GCST90004551	-0.0928915	0.222267	-0.117099	0.265152	-0.072427	0.584843	0.0896683	0.126738	0.291068	0.0236225	0.0713967	0.680265	-0.500179	0.00825639	0.00124105	0.994372	0.197543	0.392978	-0.184109	0.411603	0.256693	0.308224	0.0598539	0.178359	0.0343091	0.534136	-0.152803	0.0687451	IDP_dMRI_ProbtrackX_ISOVF_unc_r	Weighted-mean ISOVF (isotropic or free water volume fraction) in tract right uncinate fasciculus (from dMRI data)
GCST90006358	-0.0980674	0.367954	-0.157627	0.462523	-0.0517368	0.78608	0.0709076	0.330622	-0.104929	0.659923	-0.143079	0.362225	-0.235234	0.567763	0.490023	0.169344	0.605273	0.0854192	0.459307	0.412863	0.621001	0.164615	0.013719	0.873465	-0.0154235	0.813114	-0.184742	0.045285	QC_rfMRI_cleaned_inverse_tSNR	Inverted temporal signal-to-noise ratio in the artefact-cleaned pre-processed rfMRI. Reciprocal of median (across brain voxels) of voxelwise mean intensity divided by voxelwise time-series standard deviation
GCST90004029	0.0207826	0.858257	0.114325	0.289677	-0.0317976	0.821971	-0.167639	0.0273097	-0.0903757	0.558446	-0.0558636	0.495088	0.00211993	0.991784	0.0668469	0.602612	0.103375	0.607418	0.0945262	0.416246	-0.0465083	0.834637	-0.0950225	0.300661	-0.0946058	0.299588	-0.0448233	0.647766	IDP_dMRI_TBSS_MD_Genu_of_corpus_callosum	Mean MD (mean diffusivity) in genu of corpus callosum on FA (fractional anisotropy) skeleton (from dMRI data)
Mean_medialorbitofrontal_thickavg_20200522_noGC	-0.487062	0.661274	-0.70363	0.499088	-0.411691	0.741516	-1.72297	0.0481842	-1.904	0.394447	-0.897791	0.373938	-2.53108	0.397835	-2.09025	0.214443	-2.83065	0.288658	-1.66999	0.417079	-1.89652	0.572442	-1.72738	0.0603456	-1.91738	0.0943326	-1.48876	0.129317	NA	NA
GCST90002627	0.196514	6.63519e-05	0.234735	0.00146316	0.182403	0.00299891	0.0688165	0.0861772	0.0793401	0.37217	-0.0996247	0.299296	0.177816	0.167628	0.0885826	0.372294	0.123776	0.412728	0.0963592	0.417211	0.0755599	0.689658	0.0629643	0.0883324	0.0235022	0.655644	-0.0238536	0.754908	aseg_lh_volume_VentralDC	Volume of VentralDC in the left hemisphere generated by subcortical volumetric segmentation (aseg)
GCST90003866	0.084709	0.00600125	0.105263	0.0928844	0.0696802	0.0586736	-0.014084	0.523719	-0.00848805	0.863325	0.017111	0.678071	0.0162596	0.812479	-0.028119	0.479708	-0.078153	0.21002	0.0397314	0.42135	-0.0233157	0.765104	-0.00539301	0.803137	-0.0153735	0.491444	-0.0263817	0.394138	IDP_SWI_T2star_right_caudate	Median T2star in right caudate (from SWI data)
GCST90003752	-0.0126276	0.872642	-0.104308	0.236488	0.0458459	0.671465	-0.020403	0.68495	-0.227296	0.136292	-0.2261	0.0157751	-0.0139079	0.929424	-0.100742	0.440014	-0.194817	0.423049	-0.112468	0.422033	-0.220058	0.312728	-0.0845166	0.023014	-0.07247	0.207321	-0.0785129	0.283226	aseg_global_intensity_4th-Ventricle	Mean intensity of 4th-Ventricle in the whole brain generated by subcortical volumetric segmentation (aseg)
GCST90003597	0.280172	0.0313375	0.235457	0.119322	0.298889	0.0239354	-0.219984	0.00387048	-0.175553	0.299636	-0.120645	0.628729	0.0419184	0.90833	-0.109272	0.438808	-0.0652802	0.768644	-0.190938	0.42207	0.163812	0.554345	-0.168923	0.0105891	-0.137597	0.0551765	-0.156141	0.250427	aparc-DKTatlas_rh_thickness_superiorfrontal	Mean thickness of superiorfrontal in the right hemisphere generated by parcellation of the white surface using DKT parcellation
GCST90005458	0.0983094	0.410754	0.369566	0.0321398	-0.0893903	0.72658	0.0583408	0.545145	-0.0856765	0.69013	-0.187794	0.705322	0.155315	0.619377	0.233615	0.35897	0.689115	0.0844024	0.251267	0.422192	0.392935	0.430534	0.0504475	0.503679	0.0756402	0.402294	0.00216447	0.993897	rfMRI connectivity (ICA100 edge 605)
GCST90003232	0.182719	0.295451	0.188277	0.335177	0.176668	0.214023	0.242062	0.0168353	0.127184	0.743999	0.02826	0.828159	0.498419	0.0170725	-0.18405	0.308703	-0.24308	0.388653	-0.175764	0.427216	-0.510839	0.14473	0.207741	0.122091	0.298979	0.00858862	0.189597	0.354762	BA-exvivo_rh_area_MT	Area of MT in the right hemisphere generated by parcellation of the white surface using BA_exvivo parcellation
GCST90002677	-0.0811499	0.503103	0.153384	0.571797	-0.251394	0.0421805	0.0656046	0.491434	0.0184196	0.935409	-0.0975828	0.48814	0.0143376	0.951336	-0.0494006	0.836376	0.357401	0.344613	-0.229473	0.428748	-0.0277227	0.953324	-0.0280412	0.606007	0	1	0	1	HippSubfield_lh_volume_molecular-layer-HP-head	Volume of molecular-layer-HP-head in the left hemisphere generated by subcortical volumetric sub-segmentation of the Hippocampal Subfields
GCST90003193	-0.136399	0.0320641	-0.138063	0.147203	-0.134604	0.0900283	0.0160936	0.767249	0.0319597	0.868078	-0.109051	0.540339	-0.262726	0.13195	0.0715174	0.483456	-0.00288155	0.985578	0.100574	0.429756	0.127276	0.52234	-0.0442031	0.388381	-0.0488261	0.359501	-0.140135	0.327529	aparc-pial_rh_area_parstriangularis	Area of parstriangularis in the right hemisphere generated by parcellation of the pial surface using Desikan-Killiany parcellation
GCST90002457	-0.216286	0.0922683	-0.268037	0.163397	-0.164187	0.305836	-0.0751963	0.52828	-0.62402	0.0309944	0.0155861	0.936072	0.560675	0.0860675	0.33442	0.432215	0.312378	0.538957	0.473847	0.432105	-0.0702023	0.912523	-0.0783843	0.363956	0	1	0	1	IDP_T1_FAST_ROIs_L_mid_front_gyrus	Volume of grey matter in Left Middle Frontal Gyrus
GCST90003169	-0.185084	0.0411941	-0.290538	0.00288458	-0.125705	0.173042	0.00163404	0.98559	0.097695	0.575725	0.042414	0.698551	-0.142268	0.434954	0.0433854	0.689553	0.112467	0.57007	0.104127	0.440799	-0.173344	0.412677	0.0568566	0.302182	0.0454575	0.448709	0.159862	0.0421162	aparc-pial_lh_area_superiorparietal	Area of superiorparietal in the left hemisphere generated by parcellation of the pial surface using Desikan-Killiany parcellation
GCST90004471	-0.17291	0.0491607	-0.0616126	0.578947	-0.248096	0.0114341	-0.0238252	0.631046	-0.0958879	0.299842	-0.0634325	0.619664	0.0225559	0.86774	-0.108864	0.290722	-0.477359	0.000316521	0.105731	0.44148	-0.248433	0.134486	-0.0131165	0.774918	-0.0181449	0.645715	0.065185	0.564771	IDP_dMRI_ProbtrackX_OD_slf_l	Weighted-mean OD (orientation dispersion index) in tract left superior longitudinal fasciculus (from dMRI data)
GCST90003123	0	1	0	1	0	1	-0.0336082	0.759025	-0.701854	0.00375124	0.218884	0.303453	-0.186119	0.654224	-0.0591685	0.690262	-0.444966	0.0547439	0.143274	0.441721	-0.404571	0.365217	-0.0903484	0.441684	0	1	0	1	aparc-Desikan_rh_area_paracentral	Area of paracentral in the right hemisphere generated by parcellation of the white surface using Desikan-Killiany parcellation
GCST90003340	0.0306212	0.589104	0.133751	0.03235	-0.0288009	0.672926	-0.0362455	0.528398	-0.0198819	0.774556	-0.0523045	0.403258	-0.0665915	0.544404	0.105247	0.142842	0.0916632	0.416395	0.0682158	0.442369	0.218124	0.12352	-0.0484526	0.247148	-0.0644781	0.26596	-0.0405811	0.420135	aparc-a2009s_lh_area_S-calcarine	Area of S-calcarine in the left hemisphere generated by parcellation of the white surface using Destrieux (a2009s) parcellation
GCST90002789	0	1	0.0964546	0.277707	0.108076	0.509991	-0.00848198	0.853988	-0.189203	0.0441708	-0.127007	0.116295	0.227762	0.41822	-0.0707729	0.373315	0.0103402	0.938391	-0.0875244	0.443073	0.085079	0.579826	-0.024269	0.434378	-0.0243857	0.523052	-0.0734901	0.209631	aparc-Desikan_lh_volume_postcentral	Volume of postcentral in the left hemisphere generated by parcellation of the white surface using Desikan-Killiany parcellation
GCST90003473	0.0920925	0.529824	0.171922	0.323956	0.0376128	0.829701	-0.144382	0.0201292	-0.167709	0.469942	-0.217476	0.0654785	0.117865	0.554513	-0.0996618	0.609639	-0.412359	0.0887176	0.194254	0.44592	-0.267862	0.381126	-0.139215	0.0230075	-0.126462	0.032879	-0.0362472	0.719839	aparc-Desikan_lh_thickness_superiorparietal	Mean thickness of superiorparietal in the left hemisphere generated by parcellation of the white surface using Desikan-Killiany parcellation
GCST90002707	-0.264954	0.0324665	-0.277177	0.0328432	-0.257368	0.0590213	-0.0701683	0.526122	-0.136841	0.266546	-0.247	0.0224356	-0.31856	0.078234	-0.106686	0.528613	-0.126837	0.595433	-0.162434	0.446334	-0.24927	0.406031	-0.14427	0.0643631	-0.196994	0.00732212	-0.363836	0.00131433	HippSubfield_rh_volume_CA3-head	Volume of CA3-head in the right hemisphere generated by subcortical volumetric sub-segmentation of the Hippocampal Subfields
GCST90002764	0.186399	0.149487	0.165847	0.103572	0.0333922	0.701031	0.0116574	0.875192	0.084436	0.549715	-0.0837371	0.467371	-0.0102146	0.942414	0.128615	0.226566	0.341846	0.0631154	0.0995076	0.448252	0.414946	0.0482917	0.0767499	0.427041	-0.0154841	0.767741	-0.03731	0.639562	Brainstem_global_volume_Medulla	Volume of Medulla in the whole brain generated by subcortical volumetric sub-segmentation of the Brainstem
GCST90005919	0.0146974	0.917401	0.0133923	0.922188	0.020205	0.891752	-0.0898345	0.299337	-0.389574	0.137247	-0.292639	0.186002	0.160428	0.522983	0.22667	0.0605038	0.423192	0.0249269	0.114227	0.448948	0.602093	0.0364098	-0.0981683	0.27192	-0.093935	0.201941	-0.209211	0.387059	rfMRI connectivity (ICA100 edge 1066)
GCST90003571	0.0346596	0.795186	0.168866	0.5289	-0.0422887	0.789113	-0.00387092	0.963104	0.0217713	0.906135	0.0311189	0.88693	-0.770182	0.00401579	-0.118037	0.660647	0.125026	0.736434	-0.46067	0.450252	0.045144	0.922806	-0.0504745	0.427523	0.0126061	0.87303	-0.172375	0.150303	aparc-DKTatlas_lh_thickness_insula	Mean thickness of insula in the left hemisphere generated by parcellation of the white surface using DKT parcellation
GCST90004613	-0.0578593	0.621575	0.128591	0.581392	-0.179478	0.220076	-0.130393	0.368464	-0.197735	0.359548	0.0365511	0.83226	0.0176369	0.958101	-0.377642	0.0368951	-0.777594	0.00626237	-0.171004	0.450994	-0.840171	0.0181126	-0.0016269	0.982939	0.00755032	0.968032	0.0335986	0.795252	rfMRI amplitudes (ICA100 node 25)
GCST90003254	0.122377	0.086727	0.230491	0.00375103	0.0555183	0.552964	0.0201829	0.726565	0.0991957	0.593674	0.161598	0.145654	0.11044	0.589079	0.115325	0.35429	0.0767601	0.645945	0.0936274	0.452535	0.046404	0.866738	0.0562671	0.388209	0.0509814	0.450138	0.113849	0.310726	aparc-DKTatlas_lh_area_postcentral	Area of postcentral in the left hemisphere generated by parcellation of the white surface using DKT parcellation
GCST90003094	0.137843	0.0611163	0.200403	0.00923269	0.133158	0.24186	0.00989567	0.857955	0.0659868	0.707125	0.109694	0.390691	0.265199	0.246264	0.119073	0.236306	0.0608389	0.658079	0.0821365	0.452874	0.0746926	0.723188	0.0554099	0.353451	0.0496234	0.420603	0.109576	0.260268	aparc-Desikan_lh_area_postcentral	Area of postcentral in the left hemisphere generated by parcellation of the white surface using Desikan-Killiany parcellation
GCST90004037	0.020025	0.828053	0.0620717	0.700955	-0.00868736	0.928298	-0.0833768	0.145689	0.00077374	0.996956	0.267494	0.0138731	0.140749	0.4473	0.192189	0.335349	-0.0581729	0.854398	0.182626	0.452982	-0.110917	0.781404	0.0162331	0.796358	-0.0108958	0.882674	0.2401	0.0847889	IDP_dMRI_TBSS_MD_Inferior_cerebellar_peduncle_R	Mean MD (mean diffusivity) in inferior cerebellar peduncle (right) on FA (fractional anisotropy) skeleton (from dMRI data)
Mean_isthmuscingulate_thickavg_20200522_noGC	-0.282336	0.713009	0.0465574	0.958306	-0.511495	0.599491	-0.677653	0.147831	-0.0247621	0.986063	-2.31694	0.0938945	-2.17355	0.0836387	-0.750312	0.34691	-1.65288	0.188074	-0.74081	0.453217	-2.10777	0.180175	-1.42995	0.116168	-0.856857	0.0142733	-1.00842	0.162856	NA	NA
Mean_medialorbitofrontal_surfavg_20190429_noGC	0.000594431	0.29269	0.000454798	0.385237	0.000674855	0.341258	-0.000171167	0.783658	0.00174838	0.0170703	-0.00118382	0.0230528	0.000689347	0.562219	0.000330634	0.655409	-0.000131103	0.910432	0.000679027	0.455791	0.000248635	0.864582	9.68267e-05	0.852975	0.000130791	0.845155	-0.00029518	0.706385	NA	NA
GCST90003495	0.0984153	0.397748	0.302893	0.113263	-0.0299666	0.880336	-0.300424	0.0023132	-0.211391	0.195175	0.0398438	0.786437	0.252532	0.29325	-0.0628856	0.774557	0.176603	0.611652	0.199678	0.459779	0.358826	0.416168	-0.173202	0.00225097	-0.161359	0.053168	0.015217	0.904565	aparc-Desikan_rh_thickness_paracentral	Mean thickness of paracentral in the right hemisphere generated by parcellation of the white surface using Desikan-Killiany parcellation
GCST90004399	-0.0109846	0.839359	-0.0278165	0.629566	-0.00216445	0.973381	0.0396033	0.362553	0.160851	0.0162239	-0.0587955	0.3446	-0.00199394	0.985735	-0.0757171	0.294432	-0.165507	0.14561	-0.065675	0.461184	-0.215728	0.20381	0.0375242	0.365521	0.0178297	0.597219	-0.0139422	0.756517	IDP_dMRI_ProbtrackX_ICVF_str_r	Weighted-mean ICVF (intra-cellular volume fraction) in tract right superior thalamic radiation (from dMRI data)
GCST90002860	0.184799	0.396276	0.205145	0.380881	0.169271	0.351984	0.225323	0.0176675	-0.0164329	0.95914	-0.00146025	0.990901	0.375215	0.105426	-0.217985	0.274437	-0.153985	0.620946	-0.180415	0.463403	-0.397895	0.304901	0.163241	0.204721	0.215908	0.11939	0.18056	0.319713	BA-exvivo_rh_volume_MT	Volume of MT in the right hemisphere generated by parcellation of the white surface using BA_exvivo parcellation
GCST90004537	-0.0536931	0.265344	-0.0559259	0.438222	-0.0586103	0.338632	0.0177801	0.777467	0.202163	0.0168877	0.102855	0.264754	-0.183783	0.136548	-0.0485537	0.730162	0.0778625	0.705216	-0.12719	0.463526	-0.0358783	0.892056	0.0320012	0.27079	0.00825589	0.834096	0.0097904	0.873388	IDP_dMRI_ProbtrackX_ISOVF_ifo_l	Weighted-mean ISOVF (isotropic or free water volume fraction) in tract left inferior fronto-occipital fasciculus (from dMRI data)
GCST90003618	-0.0733273	0.473109	0.0705361	0.644499	-0.150289	0.255001	-0.182239	0.0296324	-0.293756	0.0585004	-0.21649	0.188854	-0.204838	0.362052	0.108277	0.75346	0.132141	0.725598	0.213791	0.465374	0.123375	0.805711	-0.204137	0.00394292	-0.185773	0.0402392	-0.145049	0.34835	aparc-a2009s_lh_thickness_G-front-sup	Mean thickness of G-front-sup in the left hemisphere generated by parcellation of the white surface using Destrieux (a2009s) parcellation
GCST90004314	-0.0356466	0.633125	-0.00830223	0.920503	-0.0494808	0.531954	-0.0590033	0.133568	-0.0930651	0.269002	0.131339	0.039435	0.102254	0.476649	0.117903	0.138523	0.136533	0.30983	0.0737881	0.466043	0.118068	0.46207	-0.03053	0.297722	-0.0649093	0.0407051	0.0191906	0.715573	IDP_dMRI_ProbtrackX_L3_ilf_l	Weighted-mean L3 in tract left inferior longitudinal fasciculus (from dMRI data)
GCST90004361	0.00119535	0.977767	0.0121121	0.810322	-0.00917709	0.861306	0.0681276	0.177438	0.165035	0.0354278	-0.0439242	0.384255	-0.0704482	0.413763	-0.0191119	0.744392	-0.050906	0.618311	-0.0529555	0.466167	-0.0995931	0.426283	0.054448	0.185451	0.069049	0.139769	0.00534812	0.894909	IDP_dMRI_TBSS_ICVF_Cingulum_cingulate_gyrus_R	Mean ICVF (intra-cellular volume fraction) in cingulum cingulate gyrus (right) on FA (fractional anisotropy) skeleton (from dMRI data)
GCST90003947	-0.0483316	0.50634	-0.0256331	0.779187	-0.0634407	0.450338	0.0927137	0.0184295	0.165006	0.0584502	0.0138569	0.901414	-0.0920481	0.466288	0.101561	0.356194	0.153886	0.336339	0.100925	0.467733	0.322934	0.116475	0.0432154	0.254688	0.0463782	0.223982	-0.0480077	0.56667	IDP_dMRI_ProbtrackX_FA_slf_r	Weighted-mean FA (fractional anisotropy) in tract right superior longitudinal fasciculus (from dMRI data)
GCST90002568	0.0466924	0.668158	-0.105814	0.537657	0.141023	0.29394	0.0775447	0.159486	0.18432	0.13528	0.0887911	0.401301	-0.0671882	0.704309	0.0772375	0.539732	0.290293	0.151269	-0.11304	0.468402	0.261177	0.287024	0.0930674	0.0263138	0.100975	0.0523271	0.115136	0.146335	IDP_T1_FAST_ROIs_R_cerebellum_VI	Volume of grey matter in Right VI Cerebellum
GCST90002819	-0.151215	0.19388	-0.137937	0.428741	-0.153977	0.28917	-0.0844961	0.384879	-0.435245	0.0573284	-0.373762	0.278144	-0.0297109	0.924753	0.201681	0.283301	0.409947	0.164864	0.169528	0.469177	0.741668	0.0439586	-0.147615	0.0480944	-0.162671	0.0776208	-0.301256	0.185928	aparc-Desikan_rh_volume_parsorbitalis	Volume of parsorbitalis in the right hemisphere generated by parcellation of the white surface using Desikan-Killiany parcellation
GCST90003924	0.121999	0.111043	0.0325475	0.817867	0.189797	0.033441	0.0642474	0.322016	0.123604	0.309741	-0.173403	0.278883	0.113191	0.524495	0.0809977	0.572872	-0.0497771	0.825564	0.128901	0.469338	-0.0372215	0.895598	0.0721263	0.0825527	0.102909	0.0448997	0.0356432	0.731358	IDP_dMRI_TBSS_FA_Tapetum_L	Mean FA (fractional anisotropy) in tapetum (left) on FA skeleton (from dMRI data)
GCST90004232	-0.0196845	0.706778	-0.00148802	0.981049	-0.033374	0.607602	-0.127735	0.00957165	-0.226452	0.0107599	0.0479523	0.456917	0.0971105	0.370731	0.0594025	0.547952	0.149885	0.252657	0.0715639	0.471507	0.130788	0.408698	-0.108462	0.0417788	-0.136044	0.0125499	-0.0439624	0.474052	IDP_dMRI_ProbtrackX_MD_ifo_r	Weighted-mean MD (mean diffusivity) in tract right inferior fronto-occipital fasciculus (from dMRI data)
GCST90004468	0.0492754	0.772416	-0.183301	0.390541	0.220608	0.171997	0.181127	0.011931	-0.1676	0.291904	-0.255631	0.0637362	0.00407173	0.988017	0.167861	0.281865	0.129084	0.675633	0.139899	0.471972	0.139297	0.790147	0.0434393	0.426663	0.0944934	0.161805	-0.0749664	0.686172	IDP_dMRI_ProbtrackX_OD_ml_r	Weighted-mean OD (orientation dispersion index) in tract right medial lemniscus (from dMRI data)
GCST90005233	-0.0570108	0.547448	0.325214	0.0217821	-0.312814	0.00817015	-0.0376391	0.619299	-0.0945008	0.617201	0.188334	0.197555	0.162743	0.507797	0.0755603	0.601593	0.265917	0.237257	0.12961	0.472803	0.181987	0.517329	0.00976189	0.865576	-0.018003	0.848973	0.141451	0.193533	rfMRI connectivity (ICA100 edge 380)
GCST90002454	-0.0112038	0.909175	-0.0577818	0.655389	0.00705211	0.939338	-0.0379914	0.581633	0.244395	0.0347831	0.0660366	0.501627	-0.0136394	0.933763	0.123797	0.30389	0.189671	0.307957	0.118198	0.473133	0.329921	0.157098	0.00903428	0.889899	0.0218057	0.767695	0.082623	0.283649	IDP_T1_FAST_ROIs_R_insular_cortex	Volume of grey matter in Right Insular Cortex
GCST90003062	-0.190763	0.029577	0.0182221	0.908585	-0.302078	0.086098	0.0398461	0.742977	-0.0724934	0.775338	0.156899	0.411069	0.147958	0.535364	-0.351728	0.0565707	-0.694592	0.0153799	-0.2128	0.473369	-0.500827	0.216368	0.112314	0.481309	0.097519	0.555694	0.0834512	0.723178	aparc-a2009s_rh_volume_S-orbital-H-Shaped	Volume of S-orbital-H-Shaped in the right hemisphere generated by parcellation of the white surface using Destrieux (a2009s) parcellation
GCST90003944	0.0606715	0.434955	0.0457977	0.709277	0.0679455	0.503601	0.0496192	0.635166	0.225145	0.155884	-0.256059	0.024919	-0.165562	0.32357	-0.26055	0.0885184	-0.45808	0.0958911	-0.133654	0.476291	-0.486198	0.109832	0.028339	0.683849	0.0781931	0.356925	-0.118279	0.114741	IDP_dMRI_ProbtrackX_FA_ptr_l	Weighted-mean FA (fractional anisotropy) in tract left posterior thalamic radiation (from dMRI data)
GCST90003612	0.213999	0.129517	0.32126	0.128227	0.13413	0.650022	-0.083925	0.481884	-0.245788	0.379651	-0.517611	0.00537049	0.100194	0.748907	-0.11156	0.813397	-0.163152	0.825663	0.394507	0.476999	1.12218	0.248353	-0.0877455	0.433843	-0.0608291	0.625328	-0.180469	0.191112	aparc-a2009s_lh_thickness_G-cingul-Post-ventral	Mean thickness of G-cingul-Post-ventral in the left hemisphere generated by parcellation of the white surface using Destrieux (a2009s) parcellation
GCST90003968	0.0709221	0.517598	-0.144431	0.491801	0.234064	0.0797407	0.131558	0.12487	-0.166561	0.379094	0.111839	0.495428	0.22406	0.43828	-0.0946821	0.764494	-0.191776	0.587471	-0.195708	0.477562	-0.339846	0.442325	0.07395	0.254495	0.255348	0.00639093	0.0737871	0.605317	IDP_dMRI_TBSS_MO_Anterior_limb_of_internal_capsule_R	Mean MO (diffusion tensor mode) in anterior limb of internal capsule (right) on FA (fractional anisotropy) skeleton (from dMRI data)
GCST90004205	-0.00457733	0.927869	0.0791289	0.29573	-0.0650975	0.350101	-0.123644	0.0417486	-0.148781	0.110105	0.0116081	0.918949	0.103466	0.443244	-0.0670146	0.633913	0.00189686	0.993177	-0.130925	0.480467	-0.0480313	0.881565	-0.106713	0.00469209	-0.120568	0.00228897	-0.0163083	0.839161	IDP_dMRI_TBSS_L3_Cingulum_cingulate_gyrus_R	Mean L3 in cingulum cingulate gyrus (right) on FA (fractional anisotropy) skeleton (from dMRI data)
GCST90003768	0.198115	0.0732697	0.1727	0.296474	0.187038	0.175337	0.202363	0.0192933	-0.331284	0.045126	0.277788	0.0759839	0.0374262	0.876629	0.131231	0.386048	0.190444	0.422061	0.179597	0.481527	-0.0889061	0.764444	0.108026	0.0572014	0.100687	0.355479	0.266745	0.0286755	aseg_lh_intensity_Thalamus-Proper	Mean intensity of Thalamus-Proper in the left hemisphere generated by subcortical volumetric segmentation (aseg)
GCST90003547	-0.0307605	0.94471	-0.0990472	0.766101	0.026822	0.955718	-0.324254	0.0622804	-0.385063	0.482146	0.0485423	0.902567	-0.402303	0.39757	-0.284614	0.225564	-0.43716	0.453083	-0.202432	0.483833	-0.10749	0.877683	-0.326521	0.108784	-0.345461	0.0069038	-0.207489	0.39005	aparc-DKTatlas_lh_thickness_inferiortemporal	Mean thickness of inferiortemporal in the left hemisphere generated by parcellation of the white surface using DKT parcellation
GCST90002603	0.120325	0.208079	0.158701	0.141129	0.0892205	0.535127	0.0539606	0.475612	0.256828	0.0433895	0.066753	0.656598	0.0903362	0.67008	-0.0695219	0.599078	-0.114585	0.591296	-0.114483	0.484475	-0.0855815	0.743656	0.105765	0.0155233	0.119249	0.082733	0.179439	0.111744	aseg_global_volume_CSF	Volume of CSF in the whole brain generated by subcortical volumetric segmentation (aseg)
GCST90004315	-0.0143265	0.717985	0.0016251	0.97766	-0.0214366	0.661465	-0.129163	0.00201821	-0.0880892	0.262751	0.0732157	0.239777	-0.0281889	0.787724	-0.0164082	0.854791	0.0536587	0.662467	-0.0801038	0.486188	0.00740813	0.966793	-0.0838616	0.00509858	-0.0943809	0.00355704	-0.0194811	0.6764	IDP_dMRI_ProbtrackX_L3_ilf_r	Weighted-mean L3 in tract right inferior longitudinal fasciculus (from dMRI data)
GCST90004368	-0.0764417	0.104531	-0.0182843	0.756771	-0.118585	0.0416601	0.0500718	0.263418	0.0772609	0.309952	-0.0402248	0.449634	-0.0558631	0.520906	-0.0660341	0.308197	-0.0864575	0.494893	-0.0570455	0.486847	-0.116205	0.471937	0.0288594	0.485144	0.0444059	0.318264	-0.0153985	0.746505	IDP_dMRI_TBSS_ICVF_Superior_longitudinal_fasciculus_L	Mean ICVF (intra-cellular volume fraction) in superior longitudinal fasciculus (left) on FA (fractional anisotropy) skeleton (from dMRI data)
GCST90004446	0.0407627	0.584134	0.017171	0.877458	0.0571314	0.559228	0.025047	0.828554	0.206641	0.284387	-0.0512839	0.633281	0.419374	0.0202023	-0.133065	0.483027	0.0929513	0.768545	-0.151531	0.487451	-0.28332	0.47994	0.0431962	0.703742	0.0477782	0.680923	0.117949	0.145566	IDP_dMRI_TBSS_OD_Uncinate_fasciculus_R	Mean OD (orientation dispersion index) in uncinate fasciculus (right) on FA (fractional anisotropy) skeleton (from dMRI data)
GCST90003420	-0.0948464	0.43701	-0.060886	0.739108	-0.111314	0.47522	0.105196	0.0382335	0.00652885	0.970052	-0.0106389	0.934737	0.046042	0.779548	-0.227788	0.248789	-0.520898	0.146032	-0.169713	0.488674	-0.505433	0.486334	0.0772621	0.19588	0.117498	0.271102	0.00839372	0.931707	aparc-a2009s_rh_area_S-collat-transv-ant	Area of S-collat-transv-ant in the right hemisphere generated by parcellation of the white surface using Destrieux (a2009s) parcellation
GCST90002626	0.108321	0.452447	-0.0503121	0.881117	0.238727	0.184802	0.180141	0.0207916	0.246849	0.143231	0.0867719	0.642592	-0.0594657	0.812279	0.456734	0.0623942	0.645163	0.0931634	0.207138	0.488739	0.132655	0.788347	0.1568	0.00833124	0.168877	0.0214317	0.01218	0.912927	aseg_lh_volume_Accumbens-area	Volume of Accumbens-area in the left hemisphere generated by subcortical volumetric segmentation (aseg)
GCST90002588	0.105297	0.168261	0.00185856	0.988707	0.173028	0.106465	0.0588302	0.147744	0.179572	0.0423723	0.128144	0.192874	-0.00382471	0.977767	0.0139048	0.901698	0.142107	0.384807	-0.0907648	0.488882	0.13874	0.503403	0.0772445	0.153215	0.0382942	0.503879	0.105403	0.217795	IDP_T1_FAST_ROIs_V_cerebellum_X	Volume of grey matter in Vermis X Cerebellum
GCST90002441	-0.0290864	0.802538	-0.0476308	0.709249	-0.00690362	0.958876	-0.0373296	0.599707	0.0105896	0.92499	0.183112	0.0393465	0.204542	0.169889	0.206157	0.0483919	0.199281	0.235487	0.0895771	0.489305	0.251735	0.277607	0.00112296	0.984573	-0.037652	0.512207	0.106542	0.226187	IDP_T1_FIRST_right_putamen_volume	Volume of right putamen (from T1 brain image)
Mean_superiortemporal_thickavg_20200522_noGC	-1.01108	0.178945	-0.651316	0.672123	-1.23028	0.165898	-1.03222	0.160683	-3.73572	0.020702	-0.620976	0.578587	-2.44355	0.193603	-0.313957	0.833638	-0.212875	0.951709	-1.21886	0.495067	-1.75672	0.706211	-1.1665	0.00840728	-1.34787	0.113503	-0.985665	0.288174	NA	NA
GCST90004391	0.0709523	0.236192	0.0652217	0.363338	0.0696045	0.245843	0.0814736	0.0090452	0.160895	0.0201149	-0.0529467	0.522497	-0.116328	0.247078	-0.157264	0.108378	-0.321303	0.0635415	-0.0722076	0.499209	-0.303015	0.128323	0.0446988	0.0593106	0.0750524	0.0144241	0.00472993	0.9224	IDP_dMRI_ProbtrackX_ICVF_mcp	Weighted-mean ICVF (intra-cellular volume fraction) in tract middle cerebellar peduncle (from dMRI data)
GCST90003594	0.0347385	0.786587	0.087127	0.62017	-0.00137703	0.993629	-0.107228	0.08497	-0.293855	0.060482	-0.139873	0.398856	0.20952	0.297155	0.0439217	0.820681	-0.124197	0.72072	0.144238	0.499944	-0.247142	0.475241	-0.137923	0.00363447	-0.210197	0.000345467	-0.15814	0.0774367	aparc-DKTatlas_rh_thickness_precuneus	Mean thickness of precuneus in the right hemisphere generated by parcellation of the white surface using DKT parcellation
GCST90003949	0.103928	0.104334	0.0255817	0.78943	0.170982	0.0324456	0.112234	0.121028	0.253779	0.125672	0.0370478	0.764003	0.0636433	0.705252	0.030029	0.836395	0.206343	0.290897	0.102512	0.503959	0.345077	0.15937	0.100713	0.0595917	0.109828	0.0484807	0.057486	0.61537	IDP_dMRI_ProbtrackX_FA_str_r	Weighted-mean FA (fractional anisotropy) in tract right superior thalamic radiation (from dMRI data)
GCST90003503	0.0356611	0.779603	0.0860225	0.622595	0.00136657	0.993638	-0.106614	0.0865386	-0.297885	0.0536326	-0.143659	0.383538	0.205106	0.307049	0.0392083	0.839734	-0.127609	0.712901	0.142644	0.504331	-0.254312	0.462013	-0.138599	0.00345136	-0.210429	0.000339436	-0.158959	0.0758664	aparc-Desikan_rh_thickness_precuneus	Mean thickness of precuneus in the right hemisphere generated by parcellation of the white surface using Desikan-Killiany parcellation
GCST90002527	0	1	0.199318	0.546623	0.426713	0.0491089	0.108365	0.324603	-0.0244032	0.919657	-0.060031	0.776146	0.601977	0.0878445	-0.241865	0.686512	0.243596	0.566169	-0.567679	0.505049	0.39799	0.554136	0.0520271	0.446993	0.0793621	0.351582	0.113821	0.45778	IDP_T1_FAST_ROIs_L_temp_occ_fusif_cortex	Volume of grey matter in Left Temporal Occipital Fusiform Cortex
GCST90003323	-0.172783	0.158502	-0.274821	0.0197236	-0.115052	0.375223	-0.0636568	0.46956	0.207733	0.328766	0.0893199	0.507302	-0.0614229	0.783659	0.0249968	0.849103	0.185101	0.497965	0.108736	0.505441	-0.0769851	0.763495	0.0435224	0.574324	0.00129695	0.986658	0.173829	0.0816457	aparc-a2009s_lh_area_G-parietal-sup	Area of G-parietal-sup in the left hemisphere generated by parcellation of the white surface using Destrieux (a2009s) parcellation
GCST90004150	0.0829982	0.291654	0.114755	0.142225	0.0578722	0.606569	0.0247443	0.755094	-0.0559136	0.675181	0.0597616	0.549591	0.365557	0.0149043	0.142602	0.199459	0.207521	0.203651	0.0849595	0.506432	0.415583	0.0709551	0.0166737	0.779218	0.0247428	0.760716	0.0705146	0.250924	IDP_dMRI_TBSS_L2_Posterior_corona_radiata_L	Mean L2 in posterior corona radiata (left) on FA (fractional anisotropy) skeleton (from dMRI data)
GCST90003097	-0.162955	0.0890311	-0.21466	0.134325	-0.135768	0.255941	0.0681164	0.63579	0.0821078	0.655522	0.497179	0.00149478	-0.0913333	0.732994	-0.120864	0.733787	-0.663419	0.269554	-0.279981	0.507666	-0.781876	0.271108	0.0182742	0.771137	0.0329861	0.783379	0.185788	0.113812	aparc-Desikan_lh_area_precuneus	Area of precuneus in the left hemisphere generated by parcellation of the white surface using Desikan-Killiany parcellation
GCST90003579	0	1	0	1	0	1	0.0132902	0.898947	-0.641757	0.00550925	-0.157224	0.519696	-0.101711	0.762876	-0.093407	0.672224	0.321435	0.354926	-0.179996	0.510632	0.273025	0.5304	-0.0875185	0.272505	-0.0901244	0.362108	-0.163726	0.277629	aparc-DKTatlas_rh_thickness_isthmuscingulate	Mean thickness of isthmuscingulate in the right hemisphere generated by parcellation of the white surface using DKT parcellation
GCST90004282	0.175237	0.103126	0.053484	0.739696	0.272448	0.0424036	-0.149924	0.104599	-0.0105333	0.958963	0.0560404	0.751627	0.0348727	0.946408	0.148449	0.477349	-0.144561	0.658166	0.170723	0.510948	-0.387046	0.345091	-0.0276756	0.726537	-0.0756635	0.383289	-0.0331557	0.875505	IDP_dMRI_ProbtrackX_L2_cst_r	Weighted-mean L2 in tract right corticospinal tract (from dMRI data)
GCST90003271	0.0861614	0.822433	-4.31649e-06	0.999991	0.110131	0.763021	0.312478	0.0123463	0.323607	0.278785	0.00624125	0.967004	0.39264	0.121071	-0.0966077	0.647463	0.068069	0.836087	-0.208697	0.511775	-0.105686	0.798301	0.265869	0.113795	0.0816843	0.398726	0.0652864	0.65515	aparc-DKTatlas_rh_area_inferiorparietal	Area of inferiorparietal in the right hemisphere generated by parcellation of the white surface using DKT parcellation
GCST90003957	-0.143498	0.165512	-0.310615	0.0447416	-0.00996542	0.938551	-0.00125778	0.987498	-0.19007	0.334003	-0.147547	0.333065	-0.138439	0.587302	0.159867	0.432502	0.178057	0.445337	0.177641	0.51197	0.310283	0.289367	-0.0636993	0.294796	-0.0163951	0.847107	-0.187578	0.267055	IDP_dMRI_TBSS_MO_Fornix	Mean MO (diffusion tensor mode) in fornix on FA (fractional anisotropy) skeleton (from dMRI data)
GCST90004363	0.0167116	0.661095	0.00158572	0.976812	0.0308122	0.473305	0.0821471	0.00709367	0.12742	0.0807173	-0.0512169	0.320059	-0.0588157	0.497061	-0.0399926	0.554626	-0.0659358	0.536365	-0.0547265	0.513483	-0.0358333	0.789142	0.0510639	0.075039	0.0643611	0.0769056	0.0177854	0.650743	IDP_dMRI_TBSS_ICVF_Cingulum_hippocampus_R	Mean ICVF (intra-cellular volume fraction) in cingulum hippocampus (right) on FA (fractional anisotropy) skeleton (from dMRI data)
GCST90006340	0.0299587	0.497462	0.0811323	0.219766	0.00953471	0.88668	-0.0342746	0.35248	-0.073473	0.421204	-0.114563	0.191818	-0.0102436	0.939238	0.107416	0.109604	0.22936	0.0296493	0.0547977	0.513808	0.34056	0.00971987	-0.043781	0.118167	-0.0222358	0.521976	-0.0890004	0.175649	rfMRI connectivity ICA-features 2	These are not primary variables stored at UKB but are derived from all of the individual connectivity IDPs listed above. The method for estimation of these was described in Elliott et al, Nature, 2018. Code and data to allow their re-estimation can be found at https://www.fmrib.ox.ac.uk/ukbiobank/gwaspaper/index.html
GCST90003813	0.111294	0.0447912	0.101593	0.176127	0.110972	0.0646765	0.0465811	0.334427	0.0648958	0.470682	-0.0769966	0.335183	-0.0565138	0.591829	0.0341279	0.636548	0.0743798	0.523509	0.0538306	0.521726	0.179968	0.177258	0.0255741	0.593982	0.0495317	0.256014	-0.0508974	0.343802	wg_lh_intensity-contrast_postcentral	Grey-white contrast in postcentral in the left hemisphere calculated as a percentage of the mean gray-white matter intensity from Desikan-Killiany parcellation
GCST90002759	0.0965674	0.176293	0.0352957	0.72374	0.177108	0.0796029	0.149039	0.0390932	0.0253818	0.858924	0.0809524	0.381587	0.304453	0.0801439	0.065902	0.542684	0.0451585	0.84299	0.0932955	0.522182	0.0644225	0.831003	0.148221	0.00818555	0.162392	0.0295607	0.132243	0.171184	ThalamNuclei_rh_volume_LP	Volume of LP in the right hemisphere generated by subcortical volumetric sub-segmentation of the Thalamic Nuclei
GCST90003257	-0.0809053	0.447329	-0.0813191	0.639149	-0.0827484	0.413781	0.0558382	0.517742	0.0422754	0.783033	0.41653	0.00148169	-0.273315	0.336657	0.235238	0.29399	-0.197226	0.60241	0.223256	0.522851	-0.0938889	0.831293	0.0132547	0.80039	0.0237883	0.739792	0.150272	0.125945	aparc-DKTatlas_lh_area_precuneus	Area of precuneus in the left hemisphere generated by parcellation of the white surface using DKT parcellation
GCST90004115	-0.0815315	0.556557	0.0639432	0.567302	-0.172433	0.255623	-0.21573	0.0161006	-0.334591	0.00729643	0.0784485	0.488575	0.0713774	0.820793	0.0997667	0.520543	0.285172	0.199263	0.0938083	0.526024	0.327931	0.163816	-0.199401	0.0174711	-0.227784	0.000570614	-0.0112109	0.933311	IDP_dMRI_TBSS_L1_Superior_longitudinal_fasciculus_R	Mean L1 in superior longitudinal fasciculus (right) on FA (fractional anisotropy) skeleton (from dMRI data)
GCST90003936	0.0463981	0.36599	0.0596803	0.33751	0.0279383	0.658155	0.113392	0.00801048	0.0495295	0.557748	-0.00915316	0.886897	0.15682	0.13721	-0.0197749	0.858516	-0.0744038	0.581195	0.0836577	0.527002	-0.0138042	0.937643	0.0734655	0.0628643	0.0777219	0.0586934	0.0282082	0.600022	IDP_dMRI_ProbtrackX_FA_fmi	Weighted-mean FA (fractional anisotropy) in tract forceps minor (from dMRI data)
GCST90004133	-0.102254	0.196812	-0.00170851	0.988504	-0.153449	0.121038	-0.195798	0.0237851	-0.2332	0.111809	0.271231	0.0901435	0.17614	0.406492	-0.0353182	0.872311	-0.519804	0.136236	0.167986	0.527254	-0.672797	0.125249	-0.106903	0.100825	-0.138242	0.080882	0.0859637	0.364532	IDP_dMRI_TBSS_L2_Inferior_cerebellar_peduncle_R	Mean L2 in inferior cerebellar peduncle (right) on FA (fractional anisotropy) skeleton (from dMRI data)
GCST90005960	0.108239	0.316015	-0.026518	0.944282	0.213431	0.11317	0.0427101	0.697704	0.452823	0.023408	-0.0933467	0.634859	0.0122614	0.966249	0.286064	0.606678	0.252615	0.791438	0.384473	0.528298	0.515052	0.497115	0.0600964	0.723905	0.0241704	0.862826	0.00891918	0.973231	rfMRI connectivity (ICA100 edge 1107)
GCST90004354	-0.00662974	0.932777	-0.0111531	0.883771	-0.00255713	0.977107	0.0680581	0.209483	0.206908	0.0107424	-0.00733565	0.92038	-0.111435	0.262331	-0.0271326	0.760466	-0.134414	0.366371	-0.0581629	0.52865	-0.212601	0.192806	0.0594411	0.222638	0.0925619	0.0949366	0.04763	0.376545	IDP_dMRI_TBSS_ICVF_Posterior_corona_radiata_L	Mean ICVF (intra-cellular volume fraction) in posterior corona radiata (left) on FA (fractional anisotropy) skeleton (from dMRI data)
GCST90006346	-0.00803967	0.91217	0.0238057	0.789245	-0.0385346	0.719368	0.103122	0.282614	0.246061	0.0121616	0.106311	0.334881	0.00342651	0.980871	-0.0246666	0.806193	0.230644	0.254625	-0.0775345	0.533535	0.211177	0.289076	0.0681432	0.351025	0.0679283	0.335228	0.129318	0.042259	QC_T1-to-standard_nonlinear_alignment_discrepancy	Discrepancy between the T1 brain image (nonlinearly-aligned to standard space) and the standard-space brain template
GCST90004459	0.0741353	0.719454	0.141786	0.643077	0.0587189	0.652817	0.140203	0.182165	0.272149	0.192084	-0.0488395	0.755637	0.041212	0.911651	-0.110642	0.528912	-0.316183	0.252283	-0.136555	0.533608	-0.413681	0.231663	0.181878	0.00343731	0.130026	0.16201	0.0358916	0.797584	IDP_dMRI_ProbtrackX_OD_cst_r	Weighted-mean OD (orientation dispersion index) in tract right corticospinal tract (from dMRI data)
GCST90002541	-0.149037	0.226743	-0.225119	0.348017	-0.0943082	0.542322	0.204196	0.0476194	0.0813178	0.674396	0.10655	0.525001	-0.106633	0.706343	0.106966	0.65274	0.405298	0.502567	-0.179198	0.535867	0.801056	0.0829927	0.0396162	0.552343	0.0684594	0.407242	0.0737118	0.579218	IDP_T1_FAST_ROIs_L_planum_temporale	Volume of grey matter in Left Planum Temporale
GCST90003455	-0.138432	0.332175	0.189878	0.629596	-0.368344	0.0386758	-0.140987	0.0733748	-0.407971	0.0169492	-0.0726148	0.624948	0.00123198	0.997791	-0.21117	0.382723	-0.437845	0.249799	0.181838	0.539346	0.236922	0.625688	-0.122963	0.0404781	-0.12651	0.0878139	-0.126986	0.602416	aparc-Desikan_lh_thickness_lateraloccipital	Mean thickness of lateraloccipital in the left hemisphere generated by parcellation of the white surface using Desikan-Killiany parcellation
GCST90003549	-0.136817	0.332608	0.188466	0.628168	-0.364604	0.0385527	-0.139252	0.0734411	-0.402787	0.0170158	-0.0719222	0.624046	0.00193867	0.996482	-0.209034	0.382464	-0.433286	0.249674	0.179614	0.539956	0.234822	0.625096	-0.121456	0.0405158	-0.124968	0.0878482	-0.125058	0.603864	aparc-DKTatlas_lh_thickness_lateraloccipital	Mean thickness of lateraloccipital in the left hemisphere generated by parcellation of the white surface using DKT parcellation
GCST90003133	-0.0639642	0.847649	-0.222831	0.341526	0.0145106	0.965011	-0.19028	0.0705308	-0.624362	0.0659836	-0.121522	0.54622	0.249082	0.689919	0.0937611	0.475868	-0.0553801	0.786594	0.100302	0.540862	-0.202379	0.43077	-0.17424	0.0306378	0	1	0	1	aparc-Desikan_rh_area_rostralmiddlefrontal	Area of rostralmiddlefrontal in the right hemisphere generated by parcellation of the white surface using Desikan-Killiany parcellation
GCST90003696	-0.186309	0.242691	0.147423	0.75316	-0.412703	0.0382508	-0.127097	0.194321	-0.196008	0.45342	-0.108334	0.558414	0.30129	0.339451	-0.304171	0.307329	-0.688639	0.140844	-0.222632	0.541042	-0.320327	0.62236	-0.0883348	0.240179	-0.0854915	0.354884	0.153495	0.272873	aparc-a2009s_rh_thickness_G-occipital-sup	Mean thickness of G-occipital-sup in the right hemisphere generated by parcellation of the white surface using Destrieux (a2009s) parcellation
GCST90004024	-0.0236661	0.803426	-0.0183839	0.831241	-0.0156737	0.902733	-0.0607711	0.475179	0.0974827	0.507247	0.069944	0.420521	0.0287465	0.858927	-0.15444	0.237948	-0.2524	0.195061	-0.0880372	0.547728	-0.166676	0.455389	-0.0249674	0.756513	0.0326728	0.49582	0.178232	0.0147013	IDP_dMRI_ProbtrackX_MO_str_r	Weighted-mean MO (diffusion tensor mode) in tract right superior thalamic radiation (from dMRI data)
GCST90004304	0.0167211	0.75076	0.0487978	0.535519	-0.00298998	0.976162	-0.15324	0.0114671	-0.100957	0.292937	0.0263054	0.799523	0.0958251	0.489847	0.106807	0.377243	0.015689	0.940749	0.0894869	0.548569	-0.0816601	0.733236	-0.0874299	0.0292295	-0.0972338	0.0357451	0.0242707	0.734973	IDP_dMRI_ProbtrackX_L3_cgc_l	Weighted-mean L3 in tract left cingulate gyrus part of cingulum (from dMRI data)
GCST90003277	0.0272218	0.902064	-0.00187096	0.992328	0.0478358	0.902362	-0.160035	0.357981	0.404957	0.0961638	-0.186729	0.345252	-0.00103442	0.998344	-0.414254	0.0684381	-0.736136	0.0374425	-0.167976	0.549082	-0.283216	0.522825	-0.053681	0.691468	-0.0374017	0.83531	-0.0100186	0.945811	aparc-DKTatlas_rh_area_medialorbitofrontal	Area of medialorbitofrontal in the right hemisphere generated by parcellation of the white surface using DKT parcellation
GCST90004458	0.172564	0.602524	0.076594	0.910407	0.247942	0.127564	0.188802	0.0655271	0.370126	0.212298	0.026967	0.895932	0.335297	0.489667	0.0778106	0.755009	0.0403428	0.90014	0.161845	0.550136	0.0447854	0.927489	0.201252	0.0190189	0	1	0	1	IDP_dMRI_ProbtrackX_OD_cst_l	Weighted-mean OD (orientation dispersion index) in tract left corticospinal tract (from dMRI data)
GCST90002488	-0.110715	0.508054	-0.158653	0.362837	-0.101693	0.546084	0.0488424	0.545376	0.405151	0.0658164	0.501636	0.0324248	-0.122612	0.636749	-0.0339253	0.842136	-0.0966795	0.716467	-0.123929	0.557837	-0.50434	0.128172	0.100731	0.133537	0.0723061	0.339395	0.334448	0.00361705	IDP_T1_FAST_ROIs_R_supramarg_gyrus_ant	Volume of grey matter in Right Supramarginal Gyrus, anterior division
GCST90002463	0.127587	0.0728967	0.175373	0.199588	0.159061	0.359874	-0.0667168	0.208103	-0.245201	0.0403287	-0.114777	0.384527	0.345637	0.0811083	0.0217182	0.765507	-0.00228416	0.983961	0.0527287	0.561268	-0.0722198	0.612967	-0.0539875	0.177511	-0.049257	0.317943	-0.0508654	0.498621	IDP_T1_FAST_ROIs_L_precentral_gyrus	Volume of grey matter in Left Precentral Gyrus
GCST90004255	-0.00247862	0.978011	-0.118725	0.376926	0.0691516	0.538527	-0.0587818	0.447629	-0.0552912	0.746134	-0.165029	0.524212	0.159321	0.579081	0.120675	0.766322	0.958088	0.0718947	-0.187225	0.563477	1.17268	0.0416257	-0.087202	0.228436	-0.173611	0.0472155	-0.0467215	0.814018	IDP_dMRI_ProbtrackX_L1_cst_r	Weighted-mean L1 in tract right corticospinal tract (from dMRI data)
Mean_rostralmiddlefrontal_thickavg_20200522_noGC	-0.365735	0.799718	0.849117	0.591854	-1.03257	0.439086	-1.78655	0.129516	-2.09607	0.37956	-1.41837	0.311315	-3.85732	0.0546717	-2.07269	0.313935	-1.72959	0.591469	-1.43011	0.563991	-1.10463	0.785832	-1.69544	0.202636	-1.2137	0.451017	-2.78945	0.0129219	NA	NA
GCST90003210	0.0926471	0.0236603	0.125046	0.0414687	0.0774938	0.380258	-0.0234336	0.508345	-0.0806091	0.450422	0.0111507	0.920704	0.19193	0.266446	0.0583697	0.464404	-0.00813597	0.937958	0.0472135	0.564532	0.0187481	0.895667	-0.00278262	0.927664	-0.00700674	0.832159	0.0091725	0.898886	BA-exvivo_lh_area_BA3b	Area of BA3b in the left hemisphere generated by parcellation of the white surface using BA_exvivo parcellation
GCST90003935	0.100297	0.24513	0.143868	0.400306	0.0651044	0.523455	0.106361	0.0630485	0.118101	0.530445	-0.354143	0.00120904	-0.0766083	0.676535	0.0729533	0.567496	0.0213652	0.94136	0.0908809	0.566931	-0.00680255	0.986054	0.0496002	0.253694	0.084309	0.117133	-0.0768142	0.3482	IDP_dMRI_ProbtrackX_FA_fma	Weighted-mean FA (fractional anisotropy) in tract forceps major (from dMRI data)
GCST90003523	0.251561	0.316763	0.801869	0.00138279	-0.116025	0.777792	-0.120999	0.127999	-0.225751	0.189127	-0.0858714	0.565274	0.299836	0.239443	-0.150327	0.202993	-0.295305	0.111294	-0.0828499	0.572299	0.0146896	0.949711	-0.0508927	0.604903	-0.0561083	0.585426	0.144924	0.41781	BA-exvivo_lh_thickness_V2	Mean thickness of V2 in the left hemisphere generated by parcellation of the white surface using BA_exvivo parcellation
GCST90002831	-0.095224	0.342063	-0.141513	0.170122	-0.079596	0.420514	0.0371816	0.497096	0.254659	0.122184	0.315883	0.0764411	-0.118405	0.499387	-0.0435874	0.70816	-0.101139	0.578364	-0.0816572	0.57323	-0.389188	0.0862104	0.0666227	0.16519	0.0418937	0.435898	0.217329	0.0215541	aparc-Desikan_rh_volume_supramarginal	Volume of supramarginal in the right hemisphere generated by parcellation of the white surface using Desikan-Killiany parcellation
GCST90003162	0.129789	0.0113218	0.133946	0.0809547	0.133739	0.206353	-0.0327862	0.44625	-0.0610601	0.6933	0.0333292	0.82877	0.22943	0.340267	0.0713263	0.446981	-0.0132677	0.914436	0.0545202	0.573946	-0.00380882	0.982044	0.00528067	0.90202	0.00190627	0.962152	0.0252125	0.798058	aparc-pial_lh_area_postcentral	Area of postcentral in the left hemisphere generated by parcellation of the pial surface using Desikan-Killiany parcellation
GCST90003474	-0.260879	0.0140871	-0.234001	0.141477	-0.272776	0.0397871	-0.208317	0.0159455	-0.300734	0.406235	0.120883	0.662538	-0.065491	0.814172	-0.0475487	0.864761	0.130776	0.762771	-0.194194	0.574834	0.0945355	0.818603	-0.110465	0.152683	-0.183485	0.11528	-0.0353699	0.821403	aparc-Desikan_lh_thickness_superiortemporal	Mean thickness of superiortemporal in the left hemisphere generated by parcellation of the white surface using Desikan-Killiany parcellation
GCST90005804	-0.244039	0.00349945	-0.267335	0.032417	-0.248163	0.0174522	-0.0726407	0.432006	0.0447826	0.737147	0.0123155	0.932849	-0.10012	0.620596	-0.0433708	0.854275	-0.0758702	0.801291	0.131002	0.577226	-0.0351819	0.944719	-0.0401984	0.639708	-0.11816	0.170877	-0.00319504	0.985634	rfMRI connectivity (ICA100 edge 951)
GCST90003627	-0.308037	0.123517	-0.217049	0.304673	-0.355185	0.0269506	-0.30488	0.173695	-0.423135	0.397462	-0.118203	0.523758	-0.328995	0.54612	0.224479	0.444346	0.437073	0.339909	0.196523	0.578492	0.796421	0.162269	-0.275037	0.324838	-0.254624	0.325049	-0.0697673	0.852877	aparc-a2009s_lh_thickness_G-pariet-inf-Angular	Mean thickness of G-pariet-inf-Angular in the left hemisphere generated by parcellation of the white surface using Destrieux (a2009s) parcellation
GCST90002922	-0.0938854	0.349416	-0.140375	0.173885	-0.0784739	0.427012	0.0386525	0.479035	0.261688	0.0986973	0.30943	0.0912857	-0.124141	0.477473	-0.0432562	0.703152	-0.0977792	0.581509	-0.0783592	0.579478	-0.375788	0.08914	0.0679768	0.146016	0.0439889	0.403992	0.215926	0.0234279	aparc-DKTatlas_rh_volume_supramarginal	Volume of supramarginal in the right hemisphere generated by parcellation of the white surface using DKT parcellation
GCST90004349	0.019429	0.688406	-0.00508717	0.931603	0.0310761	0.586519	0.0708027	0.030529	0.085897	0.291305	0.00893426	0.862694	-0.0277392	0.739065	0.0161454	0.767013	-0.0581246	0.573307	0.0375189	0.580284	-0.145908	0.172038	0.0462377	0.111492	0.0568761	0.0820167	0.0432692	0.24597	IDP_dMRI_TBSS_ICVF_Anterior_corona_radiata_R	Mean ICVF (intra-cellular volume fraction) in anterior corona radiata (right) on FA (fractional anisotropy) skeleton (from dMRI data)
GCST90004234	-0.068456	0.115487	-0.0414396	0.586682	-0.0873829	0.107653	-0.0982076	0.00775699	-0.102689	0.334075	0.0863019	0.221015	-0.00789339	0.955062	0.0195435	0.83975	0.068951	0.585766	-0.0598076	0.581249	0.0242734	0.877366	-0.0718301	0.0102528	-0.0912999	0.00823173	-0.0290759	0.581308	IDP_dMRI_ProbtrackX_MD_ilf_r	Weighted-mean MD (mean diffusivity) in tract right inferior longitudinal fasciculus (from dMRI data)
GCST90002536	-0.298827	0.00979364	-0.200558	0.246312	-0.350429	0.015193	-0.0646296	0.53541	0.103685	0.650871	0.403411	0.2832	0.124582	0.707997	0.079757	0.857778	0.0861956	0.90088	-0.290069	0.582669	-0.423448	0.631347	0.0217505	0.783236	-0.00300099	0.975508	0.128571	0.585445	IDP_T1_FAST_ROIs_R_parietal_operc_cortex	Volume of grey matter in Right Parietal Operculum Cortex
GCST90004163	-0.0242835	0.823682	0.146561	0.229421	-0.116972	0.380484	-0.150762	0.0337949	-0.120045	0.567657	-0.231699	0.26257	0.10287	0.652422	0.0246993	0.934488	0.211864	0.564767	-0.172799	0.584787	0.15297	0.749151	-0.153782	0.0046295	-0.15027	0.025667	-0.0474172	0.769891	IDP_dMRI_TBSS_L2_Superior_longitudinal_fasciculus_R	Mean L2 in superior longitudinal fasciculus (right) on FA (fractional anisotropy) skeleton (from dMRI data)
GCST90003586	0.0982927	0.39309	0.299507	0.11337	-0.0281928	0.886182	-0.24799	0.0138482	-0.22412	0.134063	0.0554698	0.667129	0.233408	0.282932	-0.109741	0.525964	-0.0703913	0.796373	0.116087	0.587408	0.10393	0.762706	-0.152431	0.00322763	-0.147637	0.0444635	0.00624505	0.955332	aparc-DKTatlas_rh_thickness_paracentral	Mean thickness of paracentral in the right hemisphere generated by parcellation of the white surface using DKT parcellation
GCST90004462	0.119225	0.274216	0.357461	0.028623	-0.0601249	0.658492	-0.0224902	0.7848	-0.0771701	0.72407	0.115239	0.644535	-0.261364	0.330339	0.142575	0.425266	-0.0310743	0.942454	0.120472	0.58744	-0.490205	0.161348	-0.0347407	0.578941	-0.103669	0.181312	0.202171	0.210347	IDP_dMRI_ProbtrackX_OD_ifo_l	Weighted-mean OD (orientation dispersion index) in tract left inferior fronto-occipital fasciculus (from dMRI data)
GCST90004329	-0.0543168	0.204731	-0.0455333	0.402176	-0.0618604	0.270958	0.104484	0.0116397	0.0303135	0.732799	0.00280434	0.952998	-0.0249213	0.769808	-0.0259227	0.641556	-0.101071	0.241829	-0.0368874	0.589432	-0.0980341	0.377488	0.0342443	0.436604	0.0411522	0.362847	-0.0197082	0.614981	IDP_dMRI_TBSS_ICVF_Genu_of_corpus_callosum	Mean ICVF (intra-cellular volume fraction) in genu of corpus callosum on FA (fractional anisotropy) skeleton (from dMRI data)
GCST90004268	-0.128705	0.0680356	-0.0808761	0.372105	-0.130819	0.159044	-0.109972	0.135119	-0.183654	0.0791575	0.155112	0.133893	-0.0109569	0.948443	0.0161399	0.905621	0.0601613	0.78945	-0.0851685	0.589663	0.000247919	0.999177	-0.106141	0.12231	-0.154093	0.0360796	-0.0336628	0.686458	IDP_dMRI_ProbtrackX_L1_slf_r	Weighted-mean L1 in tract right superior longitudinal fasciculus (from dMRI data)
GCST90002608	0.0342438	0.670763	-0.122576	0.279208	0.174521	0.0569021	0.0283974	0.756781	-0.104439	0.425065	0.0556059	0.625504	0.118339	0.534699	0.295075	0.0460792	0.299929	0.197452	0.0979241	0.590016	0.49957	0.0886789	0.032823	0.601774	-0.0444026	0.558889	0.047631	0.576843	aseg_global_volume_CC-Mid-Posterior	Volume of CC-Mid-Posterior in the whole brain generated by subcortical volumetric segmentation (aseg)
GCST90002532	-0.18634	0.0494768	-0.213151	0.150424	-0.169723	0.151549	-0.0556278	0.510758	-0.12557	0.822972	-0.256696	0.54409	-0.196902	0.468805	0.0785519	0.613627	0.0802342	0.741216	0.104573	0.590399	0.288017	0.504469	-0.0765281	0.527674	-0.0696072	0.486399	-0.173844	0.585638	IDP_T1_FAST_ROIs_R_front_operc_cortex	Volume of grey matter in Right Frontal Operculum Cortex
GCST90003296	-0.0661588	0.639242	-0.0901799	0.613474	-0.0662502	0.566419	0.0810203	0.18389	0.00770903	0.954158	0.0465229	0.689425	0.333031	0.106782	0.00974646	0.948227	0.01007	0.962488	-0.0952636	0.596122	-0.0618257	0.817797	0.113042	0.0476333	0.123414	0.155687	0.123401	0.183167	aparc-DKTatlas_rh_area_insula	Area of insula in the right hemisphere generated by parcellation of the white surface using DKT parcellation
GCST90003636	-0.226769	0.014212	-0.205838	0.1373	-0.235495	0.041417	-0.1823	0.0156244	-0.269523	0.384224	0.0998694	0.682359	-0.0564842	0.816235	-0.0358419	0.884376	0.124246	0.742502	-0.163277	0.5965	0.0919478	0.798687	-0.0979013	0.132924	-0.162364	0.0973156	-0.0340118	0.802479	aparc-a2009s_lh_thickness_G-temp-sup-Lateral	Mean thickness of G-temp-sup-Lateral in the left hemisphere generated by parcellation of the white surface using Destrieux (a2009s) parcellation
GCST90003198	-0.222887	0.0252293	-0.221492	0.136996	-0.216061	0.0820038	-0.00525409	0.94998	0.0173084	0.925848	0.153161	0.818971	-0.262282	0.547102	0.0315612	0.897224	0.173651	0.650235	-0.159474	0.597145	-0.165481	0.733394	-0.0847014	0.524402	-0.0181404	0.816746	0.0134256	0.973161	aparc-pial_rh_area_precuneus	Area of precuneus in the right hemisphere generated by parcellation of the pial surface using Desikan-Killiany parcellation
GCST90002991	0.0503267	0.745239	0.100252	0.687525	-0.00131877	0.990817	0.0458762	0.509923	0.452112	0.00369874	0.228542	0.29249	-0.308339	0.403686	0.0757997	0.711759	0.0444127	0.873816	0.118122	0.59798	-0.161757	0.733725	0.0884902	0.113075	0.0815728	0.212897	0.150846	0.427309	aparc-a2009s_lh_volume_S-postcentral	Volume of S-postcentral in the left hemisphere generated by parcellation of the white surface using Destrieux (a2009s) parcellation
GCST90002910	-0.293073	0.134823	-0.267691	0.0694928	-0.299705	0.175924	-0.246779	0.158613	-0.477254	0.00840322	-0.0884135	0.831665	0.271153	0.280197	0.00199121	0.988695	0.174901	0.428068	-0.114441	0.598986	0.506835	0.0657574	-0.208187	0.0293923	-0.290269	0.0621565	-0.00651894	0.983504	aparc-DKTatlas_rh_volume_parsorbitalis	Volume of parsorbitalis in the right hemisphere generated by parcellation of the white surface using DKT parcellation
GCST90003507	-0.031358	0.830017	0.166881	0.530057	-0.172316	0.469658	-0.114434	0.180964	-0.194314	0.294283	0.00738035	0.963683	0.553667	0.0420361	0.0973484	0.755259	-0.145912	0.765656	0.195674	0.600119	0.219506	0.78248	-0.0511552	0.441514	-0.0750293	0.35589	0.251472	0.0396888	aparc-Desikan_rh_thickness_superiorparietal	Mean thickness of superiorparietal in the right hemisphere generated by parcellation of the white surface using Desikan-Killiany parcellation
GCST90003878	0.168396	0.080451	0.111347	0.670722	0.189788	0.114602	0.0952118	0.234664	0.207209	0.519701	0.00713881	0.979522	0.329537	0.200577	0.11444	0.442341	0.508752	0.0953949	-0.0968196	0.601723	0.770236	0.00841121	0.110287	0.0697478	0.110805	0.140837	0.0252152	0.889153	IDP_dMRI_TBSS_FA_Pontine_crossing_tract	Mean FA (fractional anisotropy) in pontine crossing tract on FA skeleton (from dMRI data)
GCST90002659	-0.123065	0.347718	-0.00589455	0.966743	-0.211845	0.114569	-0.15193	0.218226	-0.339919	0.0377188	-0.0847152	0.550675	0.0508848	0.792423	0.0266997	0.814059	-0.0711389	0.689858	0.117291	0.602348	-0.290667	0.193378	-0.171095	0.0906015	-0.414374	0.0826026	-0.0209006	0.921219	AmygNuclei_rh_volume_Basal-nucleus	Volume of Basal-nucleus in the right hemisphere generated by subcortical volumetric sub-segmentation of the Amygdala Nuclei
GCST90004173	-0.0412587	0.599404	0.0734562	0.407707	-0.122762	0.235767	-0.178678	0.00495687	-0.0649258	0.618846	-0.0676077	0.41499	-0.0538203	0.704972	0.0162696	0.89618	0.0535012	0.749644	0.0742428	0.60244	0.0682946	0.750029	-0.102987	0.182229	-0.0856617	0.311187	-0.0749619	0.271721	IDP_dMRI_TBSS_L3_Genu_of_corpus_callosum	Mean L3 in genu of corpus callosum on FA (fractional anisotropy) skeleton (from dMRI data)
GCST90003337	-0.0445397	0.665481	0.0517012	0.804416	-0.101099	0.568758	0.214493	0.029103	0.291932	0.185187	0.137833	0.432226	0.147557	0.637337	0.403713	0.178947	1.06889	0.238472	0.185998	0.606258	1.3357	0.021578	0.0777834	0.267085	0.0277217	0.748999	0.179445	0.178749	aparc-a2009s_lh_area_Lat-Fis-post	Area of Lat-Fis-post in the left hemisphere generated by parcellation of the white surface using Destrieux (a2009s) parcellation
GCST90003164	0.101749	0.0205464	0.100708	0.126123	0.113597	0.0774282	-0.0372014	0.309319	-0.0611353	0.5393	-0.0394926	0.618988	0.160502	0.212341	0.0193495	0.697478	0.00171417	0.986649	0.0318043	0.608286	-0.0696815	0.519599	-0.0188466	0.495039	-0.0112481	0.741105	-0.0509899	0.326006	aparc-pial_lh_area_precentral	Area of precentral in the left hemisphere generated by parcellation of the pial surface using Desikan-Killiany parcellation
Mean_lateraloccipital_surfavg_20190429_noGC	0.000245297	0.110509	0.000202861	0.269203	0.000250054	0.239877	2.0489e-05	0.870263	0.000380156	0.0442034	-0.000287385	0.147636	0.000520046	0.114024	0.000197638	0.408951	-2.16829e-05	0.955291	0.0001441	0.609658	0.000471876	0.293725	0.000123038	0.22152	0.000100829	0.468882	2.64368e-05	0.859996	NA	NA
GCST90004206	-0.0239035	0.732272	0.0448676	0.575669	-0.065497	0.463799	-0.200372	0.0148467	-0.254003	0.0286131	0.0934913	0.259244	-0.044377	0.775884	0.0886309	0.428724	0.111636	0.575172	0.0701077	0.610551	-0.0148542	0.949539	-0.149301	0.0400096	-0.166845	0.0230382	-0.00270244	0.976198	IDP_dMRI_TBSS_L3_Cingulum_cingulate_gyrus_L	Mean L3 in cingulum cingulate gyrus (left) on FA (fractional anisotropy) skeleton (from dMRI data)
GCST90003987	0.150321	0.328937	0.0885523	0.762165	0.211077	0.103334	0.144716	0.133101	0.352392	0.0848668	0.172828	0.272335	0.435183	0.0971434	0.15181	0.483302	0.329193	0.472736	0.136388	0.610621	0.519742	0.570778	0.138093	0.0297497	0.204062	0.128859	0.274661	0.0205935	IDP_dMRI_TBSS_MO_Cingulum_cingulate_gyrus_L	Mean MO (diffusion tensor mode) in cingulum cingulate gyrus (left) on FA (fractional anisotropy) skeleton (from dMRI data)
GCST90004241	0.0107484	0.881361	0.0705563	0.367544	-0.0237725	0.768672	-0.0681591	0.213503	-0.246493	0.00435894	0.0721845	0.371633	0.110841	0.357441	0.165491	0.325974	0.157771	0.498951	0.0859367	0.610706	0.0594473	0.848627	-0.086556	0.0852712	-0.107052	0.0508548	-0.0459145	0.604851	IDP_dMRI_ProbtrackX_MD_slf_r	Weighted-mean MD (mean diffusivity) in tract right superior longitudinal fasciculus (from dMRI data)
GCST90004350	0.0222149	0.645368	-0.0431821	0.448868	0.0612992	0.29166	0.107552	0.0129697	0.142476	0.122636	0.0158064	0.772883	-0.0352975	0.691097	0.0284165	0.690812	-0.0705088	0.512269	0.0379028	0.613205	-0.166897	0.176776	0.0782331	0.0704651	0.0935861	0.042418	0.0524852	0.185223	IDP_dMRI_TBSS_ICVF_Anterior_corona_radiata_L	Mean ICVF (intra-cellular volume fraction) in anterior corona radiata (left) on FA (fractional anisotropy) skeleton (from dMRI data)
GCST90004634	-0.12031	0.309499	-0.0297853	0.866593	-0.171291	0.246475	-0.210182	0.0541446	-0.0507316	0.936102	0.115938	0.573083	-0.278198	0.409736	-0.037879	0.849609	-0.248797	0.493504	0.114732	0.614925	-0.257104	0.473349	-0.236332	0.0243879	-0.272551	0.0156899	-0.0821303	0.800472	rfMRI amplitudes (ICA100 node 46)
GCST90004154	0.154399	0.179741	0.110085	0.279629	0.168527	0.250682	-0.107876	0.308898	-0.239169	0.0384555	-0.075334	0.45147	0.177433	0.348509	0.128039	0.411897	0.368688	0.0982465	0.0878259	0.618868	0.31638	0.265468	-0.0638319	0.423641	-0.111825	0.155076	-1.11525e-05	0.999888	IDP_dMRI_TBSS_L2_Sagittal_stratum_L	Mean L2 in sagittal stratum (left) on FA (fractional anisotropy) skeleton (from dMRI data)
GCST90002556	0.021736	0.71364	0.0818898	0.398845	-0.0192261	0.785514	-0.00849034	0.844213	0.214345	0.0494875	0.0699176	0.400278	-0.125642	0.360397	0.131166	0.522303	0.142086	0.705214	0.0764894	0.619955	0.25916	0.578291	-0.00621916	0.87039	0.051156	0.436944	-0.0668638	0.473772	IDP_T1_FAST_ROIs_R_hippocampus	Volume of grey matter in Right Hippocampus
GCST90002680	0.029254	0.665315	0.254846	0.0118049	-0.132888	0.115381	0.0390536	0.566846	0.153762	0.253546	0.117642	0.398398	0.112283	0.51171	0.0532707	0.755807	0.252022	0.311224	-0.108397	0.620534	0.119378	0.736634	0.0497974	0.236055	0.0110569	0.852606	0.0722657	0.390383	HippSubfield_lh_volume_CA3-body	Volume of CA3-body in the left hemisphere generated by subcortical volumetric sub-segmentation of the Hippocampal Subfields
GCST90003639	0.318821	0.0206756	0.290455	0.159124	0.343655	0.0453238	-0.0551912	0.608293	0.22995	0.328303	0.214135	0.559793	0.0908348	0.791329	0.122487	0.781418	-0.0146191	0.983246	0.236224	0.622263	-0.0557773	0.896997	-0.0429562	0.599549	-0.120202	0.237918	-0.0530372	0.75051	aparc-a2009s_lh_thickness_G-temporal-inf	Mean thickness of G-temporal-inf in the left hemisphere generated by parcellation of the white surface using Destrieux (a2009s) parcellation
GCST90004020	0.195369	0.0818701	0.212551	0.400857	0.676912	0.00592132	0.226725	0.00592217	0.329822	0.188386	-0.184309	0.367762	0.614161	0.015672	0.0698782	0.559034	-0.158761	0.396518	0.073232	0.623872	-0.119421	0.610409	0.405508	0.0270645	0.121093	0.118044	0.0530718	0.78201	IDP_dMRI_ProbtrackX_MO_ptr_r	Weighted-mean MO (diffusion tensor mode) in tract right posterior thalamic radiation (from dMRI data)
GCST90002887	-0.350379	0.00778196	-0.278073	0.157925	-0.371495	0.02386	-0.0427736	0.798786	-0.333979	0.523567	0.0209529	0.912534	0.314918	0.576783	-0.0203186	0.945331	0.488329	0.29335	0.174328	0.624595	0.368468	0.633601	-0.00513814	0.970147	0	1	0	1	aparc-DKTatlas_lh_volume_rostralmiddlefrontal	Volume of rostralmiddlefrontal in the left hemisphere generated by parcellation of the white surface using DKT parcellation
GCST90003974	-0.185461	0.15825	-0.0635822	0.650188	-0.280703	0.0347075	-0.151708	0.244504	-0.0789816	0.730554	-0.190206	0.159956	-0.234357	0.299515	0.119336	0.691979	0.205401	0.539229	-0.163552	0.627982	0.526047	0.211042	-0.146786	0.065451	-0.06269	0.49586	-0.0714079	0.606834	IDP_dMRI_TBSS_MO_Anterior_corona_radiata_R	Mean MO (diffusion tensor mode) in anterior corona radiata (right) on FA (fractional anisotropy) skeleton (from dMRI data)
GCST90004260	-0.1574	0.102825	-0.0790136	0.456103	-0.207078	0.037096	-0.054557	0.1838	-0.112729	0.437048	0.179036	0.0226088	0.0334625	0.818434	0.0286486	0.823586	0.162373	0.445412	-0.077633	0.628097	0.202206	0.359211	-0.0242927	0.435354	-0.0652945	0.11772	0.025327	0.683386	IDP_dMRI_ProbtrackX_L1_ilf_l	Weighted-mean L1 in tract left inferior longitudinal fasciculus (from dMRI data)
GCST90004046	-0.0335602	0.738473	0.00141276	0.989944	-0.0391233	0.718975	-0.171311	0.0136715	-0.176814	0.175088	0.0497466	0.612958	-0.380402	0.0350086	0.0839563	0.602129	0.147452	0.436249	0.0732591	0.630455	0.253685	0.329101	-0.15188	0.0453954	-0.159355	0.0262254	-0.166992	0.0695342	IDP_dMRI_TBSS_MD_Posterior_limb_of_internal_capsule_L	Mean MD (mean diffusivity) in posterior limb of internal capsule (left) on FA (fractional anisotropy) skeleton (from dMRI data)
GCST90002491	-0.136509	0.374155	-0.235514	0.394803	-0.107265	0.507219	0.246196	0.131358	-0.0174239	0.924303	-0.178827	0.260978	0.100679	0.704212	0.134552	0.52819	0.102905	0.832103	0.115895	0.630921	-0.160395	0.837155	0.104246	0.205963	0.175784	0.025198	0.0658934	0.579478	IDP_T1_FAST_ROIs_L_angular_gyrus	Volume of grey matter in Left Angular Gyrus
GCST90003414	0.0767773	0.151832	0.152292	0.0151582	0.0248247	0.719067	0.0431699	0.441049	0.08606	0.235246	-0.00550551	0.939856	0.00893232	0.951644	0.115752	0.202132	0.249332	0.0456131	0.0472575	0.631114	0.20094	0.241329	0.0302448	0.565378	0.0279453	0.642204	-0.062933	0.281412	aparc-a2009s_rh_area_S-calcarine	Area of S-calcarine in the right hemisphere generated by parcellation of the white surface using Destrieux (a2009s) parcellation
GCST90004189	0.11407	0.257027	0.154852	0.178116	0.103046	0.454335	-0.0994666	0.544714	-0.0893242	0.522194	0.190547	0.0867712	-0.0270955	0.921043	-0.0571197	0.723882	-0.445929	0.0825484	0.106889	0.63315	-0.732488	0.0234272	-0.0388481	0.743702	-0.119062	0.262756	-0.0630305	0.497166	IDP_dMRI_TBSS_L3_Posterior_limb_of_internal_capsule_R	Mean L3 in posterior limb of internal capsule (right) on FA (fractional anisotropy) skeleton (from dMRI data)
GCST90003224	0.0865436	0.0149109	0.080445	0.130823	0.097065	0.16517	-0.0079302	0.803633	-0.058681	0.623481	0.00608066	0.962779	0.204451	0.0881389	0.0311172	0.560864	-0.0184788	0.827785	0.0314276	0.636425	0.0172946	0.875496	0.00273238	0.943533	0.000798516	0.982784	0.00498939	0.954668	BA-exvivo_rh_area_BA3b	Area of BA3b in the right hemisphere generated by parcellation of the white surface using BA_exvivo parcellation
GCST90002607	0.00964004	0.924674	0.00280406	0.977548	-0.00421658	0.973371	0.0862659	0.0318768	0.0124528	0.888594	0.192612	0.0125827	-0.0548476	0.672118	-0.0463307	0.610024	-0.200608	0.238028	0.0532955	0.636648	-0.29993	0.101276	0.0475313	0.124639	0.0610804	0.106661	0.0592616	0.305747	aseg_global_volume_CC-Posterior	Volume of CC-Posterior in the whole brain generated by subcortical volumetric segmentation (aseg)
GCST90004440	0.135561	0.188569	0.200563	0.193835	0.094275	0.551468	0.271086	0.0026969	0.431216	0.0348168	-0.0208912	0.925358	0.118849	0.775754	-0.0346737	0.885707	-0.0298715	0.937521	-0.140127	0.638978	-0.254772	0.688789	0.24039	0.000427865	0.217562	0.00993637	0.0153643	0.927834	IDP_dMRI_TBSS_OD_Fornix_cres+Stria_terminalis_R	Mean OD (orientation dispersion index) in fornix cres+stria terminalis (right) on FA (fractional anisotropy) skeleton (from dMRI data)
GCST90002881	0.048476	0.326255	0.0453349	0.629159	0.0524972	0.300833	0.0411581	0.278448	0.122715	0.0739689	0.0109801	0.874394	0.0590891	0.601187	0.0213265	0.815493	-0.105558	0.437448	0.0471095	0.641024	-0.133502	0.479997	0.0492512	0.0373645	0.0447848	0.135719	0.0510547	0.26317	aparc-DKTatlas_lh_volume_pericalcarine	Volume of pericalcarine in the left hemisphere generated by parcellation of the white surface using DKT parcellation
GCST90003804	0.0375851	0.461764	-0.0510209	0.529083	0.101248	0.12975	0.132774	0.0012235	0.0708439	0.340482	-0.0655367	0.466488	0.0590747	0.585576	-0.0663058	0.399846	-0.297538	0.026179	-0.0500515	0.642278	-0.306624	0.0487313	0.0914539	0.0208696	0.0995312	0.0134673	0.0100159	0.857097	wg_lh_intensity-contrast_lingual	Grey-white contrast in lingual in the left hemisphere calculated as a percentage of the mean gray-white matter intensity from Desikan-Killiany parcellation
GCST90003972	0.00980088	0.945882	0.112102	0.408623	-0.029105	0.862149	-0.022952	0.776838	-0.046015	0.75874	0.0364228	0.70904	0.41748	0.0106567	-0.0845299	0.439541	-0.403941	0.0185882	0.0629805	0.642907	-0.581395	0.00668452	0.0152884	0.795416	-0.032657	0.62216	0.146457	0.0828823	IDP_dMRI_TBSS_MO_Retrolenticular_part_of_internal_capsule_R	Mean MO (diffusion tensor mode) in retrolenticular part of internal capsule (right) on FA (fractional anisotropy) skeleton (from dMRI data)
GCST90002625	-0.11982	0.762166	-0.00210093	0.995481	-0.23282	0.583107	-0.257354	0.00394183	-0.678711	0.000470987	-0.0796046	0.641008	0.187932	0.579578	0.0740148	0.764159	0.160798	0.603974	0.223524	0.642946	0.165504	0.66913	-0.253564	0.0446214	0	1	0	1	aseg_lh_volume_Amygdala	Volume of Amygdala in the left hemisphere generated by subcortical volumetric segmentation (aseg)
GCST90003107	-0.026678	0.748033	0.00785235	0.949657	-0.0635197	0.539855	0.174136	0.0626197	0.391473	0.00085072	0.0839034	0.52243	0.0553517	0.841795	0.366933	0.177061	0.550313	0.195018	0.153707	0.64302	0.844375	0.111808	0.179646	0.0458113	0.16638	0.12071	0.0805509	0.527161	aparc-Desikan_rh_area_TotalSurface	Area of TotalSurface in the right hemisphere generated by parcellation of the white surface using Desikan-Killiany parcellation
GCST90004510	-0.17168	0.0410753	-0.199111	0.112946	-0.144085	0.238724	0.0169662	0.796566	0.27417	0.273368	0.222641	0.0800746	0.0373028	0.946441	-0.0197234	0.954588	0.0503666	0.8462	-0.218346	0.644098	0.128905	0.690927	0.052283	0.296566	0.02454	0.692002	0.0575008	0.779646	IDP_dMRI_TBSS_ISOVF_External_capsule_L	Mean ISOVF (isotropic or free water volume fraction) in external capsule (left) on FA (fractional anisotropy) skeleton (from dMRI data)
GCST90002633	0.123329	0.105463	0.120296	0.48636	-0.0708817	0.685011	-0.0130552	0.863776	-0.0914185	0.590226	0.202684	0.157729	0.3174	0.0477491	-0.00902874	0.958137	0.0570216	0.767023	-0.103188	0.644864	-0.044673	0.846665	-0.0654744	0.5747	-0.031544	0.654733	0.290177	0.00133612	aseg_rh_volume_Lateral-Ventricle	Volume of Lateral-Ventricle in the right hemisphere generated by subcortical volumetric segmentation (aseg)
GCST90002950	-0.057025	0.781896	-0.111655	0.448537	-0.0371017	0.781086	0.0681505	0.405994	0.515066	0.00561237	0.289982	0.363357	-0.255864	0.359245	-0.0378471	0.791003	-0.0899043	0.687251	-0.0808167	0.650285	-0.371753	0.180673	0.120568	0.0715129	0.10916	0.153691	0.275647	0.122285	aparc-a2009s_lh_volume_G-pariet-inf-Supramar	Volume of G-pariet-inf-Supramar in the left hemisphere generated by parcellation of the white surface using Destrieux (a2009s) parcellation
GCST90002498	0.0435131	0.463418	0.0705981	0.368901	0.0492534	0.519975	0.112285	0.0397378	0.0989331	0.135716	0.0768062	0.304404	0.0755564	0.533025	0.0782934	0.293414	0.0871395	0.458846	0.0427478	0.650856	0.209707	0.156116	0.102741	0.0283716	0.0622212	0.23601	0.0326012	0.510063	IDP_T1_FAST_ROIs_R_intracalc_cortex	Volume of grey matter in Right Intracalcarine Cortex
Mean_fusiform_surfavg_20190429_noGC	0.000498869	0.0521275	0.00045435	0.100491	0.000475774	0.148204	0.000401473	0.12771	0.000958741	0.00057532	1.83746e-05	0.939034	0.000412723	0.452576	0.000104652	0.839626	-0.000491649	0.479317	0.00024024	0.65113	-9.87014e-05	0.894145	0.000365552	0.102756	0.000536366	0.0340016	0.000350125	0.136288	NA	NA
GCST90003451	0.235966	0.0904294	0.0761611	0.757478	0.309697	0.0456957	-0.211611	0.0357006	0.106502	0.634731	0.00782637	0.986639	-0.0359255	0.912313	0.0101519	0.959294	-0.275921	0.458985	0.111534	0.653574	-0.680385	0.0848307	-0.202291	0.023452	-0.27395	0.00387386	-0.0880756	0.545108	aparc-Desikan_lh_thickness_fusiform	Mean thickness of fusiform in the left hemisphere generated by parcellation of the white surface using Desikan-Killiany parcellation
GCST90002518	0.186606	0.346076	0.095534	0.653282	0.266658	0.11484	0.220209	0.00429492	-0.170483	0.319831	-0.0570172	0.700063	0.215556	0.384202	0.075698	0.713353	0.104609	0.700018	0.0954885	0.65358	0.0899508	0.791775	0.101918	0.0828869	0.165828	0.0442968	0.00943731	0.932108	IDP_T1_FAST_ROIs_R_parahipp_gyrus_ant	Volume of grey matter in Right Parahippocampal Gyrus, anterior division
GCST90004346	-0.0372564	0.451215	-0.0752333	0.19299	-0.0150195	0.786532	0.0803075	0.034196	0.176307	0.0210494	-0.0589553	0.390699	-0.0908797	0.3718	0.0621399	0.366307	0.071301	0.532341	0.0316011	0.659648	0.0711528	0.684263	0.0466731	0.222925	0.0624525	0.142886	0.0125706	0.767644	IDP_dMRI_TBSS_ICVF_Posterior_limb_of_internal_capsule_L	Mean ICVF (intra-cellular volume fraction) in posterior limb of internal capsule (left) on FA (fractional anisotropy) skeleton (from dMRI data)
GCST90004610	-0.235108	0.0517601	-0.177594	0.326527	-0.279159	0.114836	-0.0691055	0.756073	-0.263449	0.329715	-0.0157646	0.942009	0.0860124	0.837528	-0.431267	0.0357448	-0.695363	0.0301323	-0.112585	0.65968	-0.675875	0.133261	-0.00285478	0.971548	0.0461624	0.846165	0.0162036	0.906869	rfMRI amplitudes (ICA100 node 22)
GCST90002606	0.21153	0.123615	0.370261	0.0246673	0.105987	0.542058	0.154767	0.0194517	0.107055	0.544852	0.084452	0.50485	0.202674	0.336668	0.00949555	0.953342	0.0663437	0.79408	-0.0882572	0.662058	-0.112797	0.722115	0.14615	0.00373933	0.156513	0.0116109	0.0550476	0.593009	aseg_global_volume_Optic-Chiasm	Volume of Optic-Chiasm in the whole brain generated by subcortical volumetric segmentation (aseg)
GCST90003621	-0.361659	0.0142671	-0.29089	0.0645801	-0.396673	0.0224213	-0.354931	0.0505059	-0.143565	0.497037	-0.108861	0.532983	-0.449528	0.189866	0.071811	0.717409	0.208071	0.50237	0.105923	0.662146	0.452827	0.242693	-0.286007	0.106264	-0.305435	0.110351	-0.19007	0.466191	aparc-a2009s_lh_thickness_G-occipital-middle	Mean thickness of G-occipital-middle in the left hemisphere generated by parcellation of the white surface using Destrieux (a2009s) parcellation
GCST90002719	0.327124	0.0432621	0.181683	0.241594	0.448999	0.0132393	0.0614531	0.450657	-0.137686	0.552609	-0.0146771	0.905144	0.211151	0.306785	-0.173445	0.572043	-0.316243	0.266846	-0.139365	0.662449	-0.4317	0.224816	0.0634794	0.41747	0.117011	0.310022	0.116211	0.262211	ThalamNuclei_lh_volume_VLa	Volume of VLa in the left hemisphere generated by subcortical volumetric sub-segmentation of the Thalamic Nuclei
GCST90004076	0.259484	0.0477311	0.268678	0.0437198	0.241858	0.111898	0.0132833	0.895786	-0.035106	0.902384	-0.00693343	0.972152	-0.00923453	0.967274	-0.000918438	0.997309	-0.363488	0.141518	0.169237	0.662576	-0.452956	0.142194	0.0115141	0.905097	0.000526989	0.997133	0.0677145	0.530264	IDP_dMRI_TBSS_L1_Pontine_crossing_tract	Mean L1 in pontine crossing tract on FA (fractional anisotropy) skeleton (from dMRI data)
GCST90003244	0.0446043	0.660348	-0.307663	0.0508728	-0.131408	0.723579	0.089333	0.214185	-0.180385	0.566605	0.399037	0.0556706	-0.0327544	0.909657	-0.12413	0.515607	-0.26183	0.227839	-0.0970718	0.663123	0.0110273	0.96487	-0.044047	0.866506	0.155034	0.082655	0.300995	0.0225757	aparc-DKTatlas_lh_area_lateralorbitofrontal	Area of lateralorbitofrontal in the left hemisphere generated by parcellation of the white surface using DKT parcellation
GCST90003136	-0.10226	0.407497	-0.149966	0.416902	-0.091838	0.551124	0.193227	0.0703503	0.413929	0.256926	0.151096	0.761596	0.113624	0.732098	0.0592061	0.8051	-0.0756722	0.840776	-0.128257	0.664401	-0.252777	0.728932	0.226344	0.00524618	0.267066	0.00726187	0.283785	0.0610732	aparc-Desikan_rh_area_superiortemporal	Area of superiortemporal in the right hemisphere generated by parcellation of the white surface using Desikan-Killiany parcellation
GCST90004288	-0.0657456	0.120196	-0.0329739	0.663764	-0.0852208	0.106737	-0.105595	0.00380269	-0.0935904	0.375517	0.0406108	0.619655	-0.00949658	0.935699	0.00113198	0.992688	0.155088	0.317301	-0.0716469	0.664726	0.0965516	0.665848	-0.0689691	0.0265849	-0.0951276	0.0055128	-0.0258874	0.658945	IDP_dMRI_ProbtrackX_L2_ilf_r	Weighted-mean L2 in tract right inferior longitudinal fasciculus (from dMRI data)
GCST90003667	-0.00324705	0.979925	0.0123792	0.971249	-0.0306405	0.886594	-0.0351764	0.674439	-0.402872	0.0278548	-0.399664	0.0121284	0.429936	0.171116	0.0305562	0.912926	-0.171822	0.694076	0.146823	0.667756	0.0373503	0.94639	-0.121443	0.0721232	-0.0961044	0.324848	-0.0761015	0.528828	aparc-a2009s_lh_thickness_S-parieto-occipital	Mean thickness of S-parieto-occipital in the left hemisphere generated by parcellation of the white surface using Destrieux (a2009s) parcellation
GCST90004502	-0.156819	0.145455	-0.426949	0.00802026	0.0654264	0.626676	-0.312591	0.0478102	-0.0441141	0.783812	0.128193	0.351893	-0.10131	0.662606	0.199663	0.671013	0.0992135	0.852957	0.251505	0.669918	0.181231	0.704665	-0.138289	0.132919	-0.17048	0.133019	-0.0187685	0.891832	IDP_dMRI_TBSS_ISOVF_Superior_corona_radiata_L	Mean ISOVF (isotropic or free water volume fraction) in superior corona radiata (left) on FA (fractional anisotropy) skeleton (from dMRI data)
GCST90003065	-0.00847199	0.967767	-0.0305567	0.876538	-0.00670964	0.975541	0.0549154	0.489425	0.339942	0.054211	0.638222	2.82273e-05	0.0900875	0.725128	-0.010509	0.952468	-0.144884	0.600386	-0.0929555	0.671313	-0.577122	0.092588	0.105251	0.102691	0.0845334	0.257393	0.385396	0.000670989	aparc-a2009s_rh_volume_S-postcentral	Volume of S-postcentral in the right hemisphere generated by parcellation of the white surface using Destrieux (a2009s) parcellation
GCST90003326	-0.103922	0.303083	-0.0700734	0.658538	-0.124534	0.24282	0.00770209	0.914884	-0.0753393	0.637714	0.365212	0.00736119	-0.0542004	0.815847	0.250162	0.290504	0.132048	0.719983	0.213599	0.672358	0.258448	0.708108	0.00239348	0.965108	-0.0366318	0.588617	0.161564	0.114518	aparc-a2009s_lh_area_G-precuneus	Area of G-precuneus in the left hemisphere generated by parcellation of the white surface using Destrieux (a2009s) parcellation
GCST90004448	-0.196932	0.0394965	-0.174401	0.222879	-0.207477	0.0818918	0.00146437	0.984957	-0.080399	0.637097	-0.15056	0.312706	0.23619	0.462519	0.0200648	0.906864	0.384153	0.237677	-0.0900214	0.674525	0.29551	0.563085	-0.0283583	0.630097	-0.0369332	0.613824	-0.0387786	0.728105	IDP_dMRI_TBSS_OD_Tapetum_R	Mean OD (orientation dispersion index) in tapetum (right) on FA (fractional anisotropy) skeleton (from dMRI data)
GCST90006002	-0.454483	0.00286281	-0.543368	0.0134815	-0.370124	0.0614015	-0.329919	0.170356	-0.554005	0.230208	-0.420176	0.0287727	-0.666276	0.0409579	-0.0117423	0.975088	-0.314053	0.720851	0.18501	0.676163	-0.203962	0.88373	-0.327892	0.232368	-0.323795	0.153254	-0.36973	0.00995034	rfMRI connectivity (ICA100 edge 1149)
GCST90002836	0.156105	0.0916244	0.16411	0.236115	0.144378	0.211225	0.0123614	0.887997	0.236718	0.512796	0.393979	0.0310714	-0.336771	0.624424	-0.0349327	0.814112	-0.0650696	0.780236	-0.077421	0.676171	-0.334919	0.299057	0.0792878	0.492207	0.0514836	0.698615	0.169271	0.605217	BA-exvivo_lh_volume_BA2	Volume of BA2 in the left hemisphere generated by parcellation of the white surface using BA_exvivo parcellation
GCST90004108	0.103743	0.318922	0.214664	0.0682288	0.0335106	0.828496	-0.12343	0.219693	-0.176596	0.380647	0.0698354	0.478868	0.0112261	0.964914	-0.115447	0.383609	-0.304036	0.14706	0.0685393	0.677183	-0.652643	0.0132068	-0.102311	0.352056	-0.122319	0.306692	0.0284014	0.858471	IDP_dMRI_TBSS_L1_External_capsule_L	Mean L1 in external capsule (left) on FA (fractional anisotropy) skeleton (from dMRI data)
GCST90002844	0.0653275	0.32783	0.186355	0.00650768	-0.0127659	0.873078	0.0224158	0.662462	0.0602539	0.460417	0.0247117	0.834595	0.0281653	0.843866	0.015726	0.892877	0.0472614	0.803859	0.0489947	0.677899	0.27626	0.237819	0.0379881	0.29911	0.0602356	0.189054	0.04801	0.584761	BA-exvivo_lh_volume_V1	Volume of V1 in the left hemisphere generated by parcellation of the white surface using BA_exvivo parcellation
GCST90004344	0.0314639	0.574561	-0.0620076	0.399488	0.0978375	0.126844	0.0979117	0.0111348	0.206924	0.00064473	-0.0487764	0.371932	0.026901	0.785107	-0.0336567	0.714829	-0.0067149	0.943848	-0.0360113	0.678364	-0.013696	0.913779	0.0773463	0.0197857	0.0970772	0.00595925	0.0250441	0.547739	IDP_dMRI_TBSS_ICVF_Anterior_limb_of_internal_capsule_L	Mean ICVF (intra-cellular volume fraction) in anterior limb of internal capsule (left) on FA (fractional anisotropy) skeleton (from dMRI data)
GCST90003102	-0.251487	0.0546755	0.100436	0.563467	-0.342743	0.00829281	0.0159243	0.891863	-0.122475	0.524119	-0.0276973	0.887706	-0.196547	0.47423	-0.0646348	0.71186	0.0719096	0.796553	-0.0896008	0.680302	0.0728793	0.894573	0.0202896	0.899523	0.0110891	0.950841	0.126484	0.461761	aparc-Desikan_lh_area_superiortemporal	Area of superiortemporal in the left hemisphere generated by parcellation of the white surface using Desikan-Killiany parcellation
GCST90003292	-0.0841743	0.4401	-0.119487	0.379488	-0.0644785	0.558461	-0.0908286	0.092203	0.269338	0.0471766	0.228597	0.0603352	-0.0398038	0.817747	0.106702	0.334676	0.0916594	0.594885	0.0564612	0.681441	-0.00226633	0.99163	-0.000456781	0.99109	0.00704193	0.88985	0.0972995	0.209265	aparc-DKTatlas_rh_area_superiorparietal	Area of superiorparietal in the right hemisphere generated by parcellation of the white surface using DKT parcellation
GCST90004066	-0.198447	0.316208	-0.0224416	0.922617	-0.292673	0.0648004	-0.346236	0.0114291	-0.401322	0.160778	0.213627	0.391955	-0.259555	0.633814	-0.297481	0.230238	-0.260529	0.500579	-0.125441	0.681671	-0.00609016	0.989988	-0.295755	0.177668	-0.336412	0.083716	-0.101394	0.704829	IDP_dMRI_TBSS_MD_Fornix_cres+Stria_terminalis_L	Mean MD (mean diffusivity) in fornix cres+stria terminalis (left) on FA (fractional anisotropy) skeleton (from dMRI data)
GCST90003363	-0.0101222	0.909797	-0.0124979	0.918067	-0.0161288	0.872906	0.0184512	0.752598	0.43509	0.00095444	0.221988	0.183031	-0.0175682	0.925701	0.0369919	0.767314	-0.0131266	0.946501	0.0696129	0.682144	-0.207543	0.393626	0.0803385	0.0695878	0.0890784	0.104796	0.170464	0.138508	aparc-a2009s_lh_area_S-postcentral	Area of S-postcentral in the left hemisphere generated by parcellation of the white surface using Destrieux (a2009s) parcellation
GCST90005785	-0.0316149	0.733847	0.103036	0.692631	-0.13937	0.438846	-0.0392983	0.595748	-0.347974	0.0349353	0.0592647	0.700264	0.00163176	0.994563	-0.090538	0.738188	-0.0274587	0.962007	-0.157748	0.682654	-0.475677	0.402453	-0.0486741	0.589872	-0.0370096	0.667694	0.00104258	0.995433	rfMRI connectivity (ICA100 edge 932)
GCST90004352	0.0176644	0.795398	0.0152149	0.828459	0.0196232	0.812216	0.114939	0.0145091	0.142342	0.17247	-0.0865065	0.152115	-0.0573535	0.645915	0.0202997	0.800919	-0.0718931	0.571052	-0.0368317	0.683034	-0.0870873	0.539804	0.0725348	0.152583	0.0577769	0.190074	-0.051374	0.304233	IDP_dMRI_TBSS_ICVF_Superior_corona_radiata_L	Mean ICVF (intra-cellular volume fraction) in superior corona radiata (left) on FA (fractional anisotropy) skeleton (from dMRI data)
GCST90004402	0.0504276	0.738361	-0.0398	0.737113	0.0987127	0.610906	-0.109016	0.325591	0.0569867	0.797296	-0.199405	0.139832	0.481192	0.0177551	-0.139047	0.438059	-0.174334	0.410953	-0.0931537	0.684001	-0.398727	0.392785	-0.0835902	0.421855	-0.0989822	0.449312	-0.121304	0.363385	IDP_dMRI_TBSS_OD_Middle_cerebellar_peduncle	Mean OD (orientation dispersion index) in middle cerebellar peduncle on FA (fractional anisotropy) skeleton (from dMRI data)
GCST90003680	-0.120505	0.675445	-0.132611	0.724086	-0.0984109	0.682632	-0.0968876	0.697698	-0.228933	0.701681	-0.0439064	0.826521	0.16098	0.627622	0.263637	0.335393	1.12673	0.0223405	0.135514	0.685903	1.01865	0.0564234	-0.0423072	0.847478	-0.157135	0.508373	0.0139258	0.9591	aparc-a2009s_rh_thickness_G+S-subcentral	Mean thickness of G+S-subcentral in the right hemisphere generated by parcellation of the white surface using Destrieux (a2009s) parcellation
GCST90002557	-0.305354	0.270809	-0.250929	0.415294	-0.349344	0.168487	-0.213956	0.0154045	-0.304916	0.286247	-0.20569	0.223134	0.132059	0.637659	-0.085625	0.754124	-0.215093	0.36511	0.17363	0.686077	-0.314266	0.29153	-0.205699	0.00146433	0	1	0	1	IDP_T1_FAST_ROIs_L_amygdala	Volume of grey matter in Left Amygdala
GCST90003256	0.105247	0.0184394	0.0807936	0.348286	0.130709	0.0546339	0.00201721	0.964634	-0.0888875	0.332511	-0.0616611	0.387277	0.1991	0.0921559	0.0117901	0.816914	-0.00926651	0.919818	0.0259162	0.686307	-0.0866003	0.430097	-0.00135736	0.96397	0.00723485	0.837975	-0.0361729	0.489265	aparc-DKTatlas_lh_area_precentral	Area of precentral in the left hemisphere generated by parcellation of the white surface using DKT parcellation
GCST90004425	0.139157	0.0295309	0.0853108	0.372588	0.185974	0.0198567	0.117106	0.0219977	0.232226	0.0397385	0.119982	0.370033	-0.0382019	0.855718	-0.0296734	0.813629	-0.236662	0.197496	-0.0579938	0.686416	-0.378603	0.118567	0.104422	0.00731836	0.139335	0.0107945	0.0935008	0.509852	IDP_dMRI_TBSS_OD_Anterior_corona_radiata_L	Mean OD (orientation dispersion index) in anterior corona radiata (left) on FA (fractional anisotropy) skeleton (from dMRI data)
GCST90004396	-0.0386715	0.461251	-0.017933	0.781696	-0.0595771	0.328385	0.0663747	0.0515337	0.159271	0.0188481	0.0517993	0.336018	-0.0566096	0.505573	-0.0141958	0.836473	-0.0860269	0.40665	-0.0356342	0.687581	0.0326526	0.827768	0.0528517	0.0914336	0.0621365	0.0562811	0.050104	0.202487	IDP_dMRI_ProbtrackX_ICVF_slf_l	Weighted-mean ICVF (intra-cellular volume fraction) in tract left superior longitudinal fasciculus (from dMRI data)
GCST90003899	0.426532	0.0931658	0.444636	0.144045	0.423951	0.0145814	0.322185	0.0875724	0.22449	0.753996	0.150664	0.439812	0.844734	0.00966088	-0.0468929	0.784623	-0.243318	0.364999	-0.104521	0.688784	0.0164396	0.961006	0.362673	0.0862895	0	1	0	1	IDP_dMRI_TBSS_FA_Anterior_corona_radiata_R	Mean FA (fractional anisotropy) in anterior corona radiata (right) on FA skeleton (from dMRI data)
GCST90003233	0.0775849	0.459489	-0.00571805	0.970962	0.123006	0.347781	0.233765	0.00394924	-0.196988	0.206299	0.117123	0.406824	0.107182	0.636243	0.0191805	0.950348	0.472769	0.328537	-0.193559	0.689312	-0.20728	0.732015	0.128305	0.243856	0.0981287	0.277995	0.0969557	0.39411	BA-exvivo_rh_area_perirhinal	Area of perirhinal in the right hemisphere generated by parcellation of the white surface using BA_exvivo parcellation
GCST90003870	0.0706122	0.0183679	0.123517	0.00590914	0.0309498	0.418617	-0.0298767	0.1582	-0.0674873	0.147012	-0.0135054	0.742862	0.0184479	0.78765	-0.0424433	0.332145	-0.147909	0.0292667	0.0245415	0.69014	-0.136859	0.106998	-0.0183766	0.253956	-0.0241417	0.367088	-0.010521	0.774371	IDP_SWI_T2star_right_pallidum	Median T2star in right pallidum (from SWI data)
GCST90003008	0.045149	0.603508	0.112091	0.305362	0.00286921	0.982761	0.0364536	0.533898	-0.133658	0.299994	-0.319544	0.0145752	0.276635	0.468551	-0.0154236	0.880885	0.299183	0.142164	-0.0572828	0.690664	0.29191	0.411159	-0.0151207	0.746964	-0.01071	0.890482	-0.133515	0.154655	aparc-a2009s_rh_volume_G-cingul-Post-ventral	Volume of G-cingul-Post-ventral in the right hemisphere generated by parcellation of the white surface using Destrieux (a2009s) parcellation
GCST90004465	-0.328577	0.489721	-0.419581	0.20881	-0.291917	0.621176	0	1	-0.168699	0.615597	-0.645317	0.000799405	-0.432229	0.182952	0.084578	0.740084	-0.15931	0.742278	-0.105103	0.690851	-0.036277	0.930728	-0.317513	0.46411	0	1	0	1	IDP_dMRI_ProbtrackX_OD_ilf_r	Weighted-mean OD (orientation dispersion index) in tract right inferior longitudinal fasciculus (from dMRI data)
GCST90005900	0.319945	0.0122037	0.32608	0.0879209	0.341108	0.0324193	0.208566	0.249362	-0.00048483	0.998366	0.119752	0.559721	-0.0292843	0.932225	0.084298	0.86605	0.138264	0.791567	-0.141496	0.691642	-0.0781251	0.935392	0.13021	0.39798	0.261131	0.109744	0.0909528	0.555036	rfMRI connectivity (ICA100 edge 1047)
GCST90003644	-0.371349	0.131681	-0.410271	0.505056	-0.358536	0.0480371	-0.118899	0.119534	-0.240837	0.149028	-0.0823154	0.568849	-0.0836155	0.735021	0.112941	0.636367	-0.0347454	0.926325	0.116343	0.693404	0.436361	0.359675	-0.0866477	0.286892	-0.169149	0.0358554	-0.0457008	0.708791	aparc-a2009s_lh_thickness_Pole-occipital	Mean thickness of Pole-occipital in the left hemisphere generated by parcellation of the white surface using Destrieux (a2009s) parcellation
GCST90002792	-0.00318781	0.983199	0.036349	0.83904	-0.0380756	0.785344	0.0158044	0.828624	0.0622756	0.803837	0.362544	0.0125517	-0.182819	0.455527	0.311271	0.266869	0.417517	0.342452	0.224944	0.693775	0.299901	0.70377	0.0162508	0.769743	-0.0446574	0.516132	0.172809	0.0980367	aparc-Desikan_lh_volume_precuneus	Volume of precuneus in the left hemisphere generated by parcellation of the white surface using Desikan-Killiany parcellation
GCST90003913	0.0981193	0.414741	0.0890708	0.436337	0.102549	0.526126	0.00129319	0.990021	0.112023	0.43498	-0.345917	0.0134532	-0.108698	0.601641	0.0155803	0.89846	0.164577	0.388793	0.0594493	0.696582	0.0730917	0.759642	0.00190499	0.977931	0.0358708	0.605356	-0.143078	0.119566	IDP_dMRI_TBSS_FA_Cingulum_hippocampus_R	Mean FA (fractional anisotropy) in cingulum hippocampus (right) on FA skeleton (from dMRI data)
GCST90002464	0	1	0.133642	0.125871	0.0610264	0.401553	-0.0526111	0.322717	-0.212704	0.128264	-0.0555387	0.552107	0.317669	0.0387775	0.0636244	0.444064	0.0803721	0.669241	0.0401731	0.697473	0.229063	0.273431	-0.0557855	0.116066	-0.0635626	0.146695	-0.056989	0.393532	IDP_T1_FAST_ROIs_R_precentral_gyrus	Volume of grey matter in Right Precentral Gyrus
GCST90003448	0.038257	0.769221	0.0351654	0.856831	0.0374061	0.818221	-0.068653	0.500128	-0.415873	0.0636221	-0.67709	0.000538887	-0.233672	0.476828	-0.19211	0.618058	-0.364018	0.45714	-0.144457	0.700592	-0.752974	0.221942	-0.168057	0.0304201	-0.22102	0.0220106	-0.274972	0.0621771	aparc-Desikan_lh_thickness_caudalmiddlefrontal	Mean thickness of caudalmiddlefrontal in the left hemisphere generated by parcellation of the white surface using Desikan-Killiany parcellation
GCST90003300	0.162584	0.102704	0.225025	0.0480546	0.125755	0.233305	0.0512473	0.609912	-0.00314689	0.991566	-0.0351764	0.770326	0.136477	0.561377	0.0566272	0.770359	-0.00681428	0.980645	0.0645262	0.700737	0.158149	0.573442	0.0271541	0.744401	0.0533693	0.765314	-0.0240621	0.866404	aparc-a2009s_lh_area_G+S-subcentral	Area of G+S-subcentral in the left hemisphere generated by parcellation of the white surface using Destrieux (a2009s) parcellation
GCST90003542	0.0381396	0.770042	0.0349321	0.857853	0.0372947	0.818859	-0.0686926	0.500063	-0.415678	0.0638686	-0.677361	0.00053925	-0.233993	0.476416	-0.191434	0.619958	-0.364271	0.457201	-0.144325	0.701076	-0.753567	0.221973	-0.168054	0.0304922	-0.221109	0.0220097	-0.275193	0.0620691	aparc-DKTatlas_lh_thickness_caudalmiddlefrontal	Mean thickness of caudalmiddlefrontal in the left hemisphere generated by parcellation of the white surface using DKT parcellation
GCST90005810	-0.270311	0.00662501	-0.33488	0.0246142	-0.236312	0.0573618	-0.077637	0.510825	0.0215498	0.892762	-0.0318652	0.817864	-0.253051	0.2739	-0.297241	0.34419	-0.392671	0.26414	-0.098924	0.701412	-0.383653	0.53917	-0.0713146	0.400668	-0.14857	0.126798	-0.0589276	0.707635	rfMRI connectivity (ICA100 edge 957)
GCST90002681	0.0153475	0.859102	0.00312385	0.976712	0.0295826	0.740629	0.169396	0.0881015	0.154533	0.332046	-0.0575007	0.568574	0.219096	0.193492	0.105204	0.486356	0.275847	0.446083	-0.0676346	0.710436	0.34656	0.249878	0.118661	0.265089	0.287651	0.0488668	0.0514531	0.789747	HippSubfield_lh_volume_GC-ML-DG-body	Volume of GC-ML-DG-body in the left hemisphere generated by subcortical volumetric sub-segmentation of the Hippocampal Subfields
Mean_posteriorcingulate_surfavg_20190429_noGC	1.55585e-05	0.985016	0.000324696	0.756345	-0.000209425	0.815758	0.000981388	0.096797	0.00138938	0.163917	-0.000495335	0.451882	0.00289813	0.0244703	0.000174567	0.835971	-0.000266375	0.840415	0.000384503	0.710836	-0.00102427	0.536477	0.00088852	0.117333	0.00108586	0.106005	0.00112442	0.149712	NA	NA
GCST90004270	-0.117204	0.271781	0.0501973	0.684057	-0.224646	0.0454224	-0.107274	0.153192	-0.0824399	0.651204	0.142088	0.12809	-0.0448132	0.774351	-0.133914	0.215344	-0.300478	0.0327313	-0.0461987	0.7128	-0.37464	0.0333837	-0.0681036	0.396218	-0.140464	0.0875144	0.0155463	0.8778	IDP_dMRI_ProbtrackX_L1_str_r	Weighted-mean L1 in tract right superior thalamic radiation (from dMRI data)
GCST90003802	0.0579061	0.244237	-0.049579	0.411277	0.1265	0.0344438	0.0502771	0.201223	-0.00491124	0.939285	-0.0163257	0.81075	-0.0965362	0.279025	-0.0734332	0.366213	-0.185125	0.0989103	-0.0402482	0.714343	-0.141357	0.242942	0.0223917	0.483797	0.030927	0.329142	-0.0383931	0.397798	wg_lh_intensity-contrast_lateraloccipital	Grey-white contrast in lateraloccipital in the left hemisphere calculated as a percentage of the mean gray-white matter intensity from Desikan-Killiany parcellation
GCST90003103	0.015362	0.899511	-0.0706385	0.625819	0.0550513	0.595128	0.160335	0.143201	0.393433	0.136341	0.293954	0.0342894	0.0189734	0.941648	0.0724775	0.724462	-0.13553	0.545457	0.103327	0.714928	-0.45307	0.150185	0.221778	0.0348304	0.204203	0.0356442	0.331827	0.000391501	aparc-Desikan_lh_area_supramarginal	Area of supramarginal in the left hemisphere generated by parcellation of the white surface using Desikan-Killiany parcellation
GCST90003788	-0.0925889	0.072514	0.00813063	0.926256	-0.150316	0.0194294	-0.0601373	0.0543566	-0.0538585	0.373601	-0.0879035	0.139788	0.0959683	0.283744	0.0229184	0.802956	0.29051	0.0868082	0.0451204	0.717531	0.387996	0.0351474	-0.0553439	0.0155646	-0.0706007	0.0170558	-0.0100307	0.832762	aseg_rh_intensity_Accumbens-area	Mean intensity of Accumbens-area in the right hemisphere generated by subcortical volumetric segmentation (aseg)
GCST90004321	-0.00772863	0.92727	0.00324428	0.974155	-0.0131038	0.880182	-0.0781824	0.254759	-0.245091	0.0226898	-0.0218472	0.812071	0.0316809	0.843895	-0.0284339	0.814183	0.0391262	0.824713	-0.0539966	0.718246	-0.187461	0.40333	-0.0578724	0.341834	-0.0696919	0.296049	-0.0138876	0.84979	IDP_dMRI_ProbtrackX_L3_slf_l	Weighted-mean L3 in tract left superior longitudinal fasciculus (from dMRI data)
GCST90004182	-0.0687595	0.365743	0.0721771	0.525751	-0.153642	0.105787	-0.121034	0.0641415	-0.127084	0.381313	0.263667	0.0342336	0.100741	0.630774	-0.052604	0.793498	-0.144687	0.649003	-0.0881644	0.718884	-0.00750268	0.985019	-0.0402932	0.416554	-0.0736453	0.229157	0.144394	0.171265	IDP_dMRI_TBSS_L3_Inferior_cerebellar_peduncle_L	Mean L3 in inferior cerebellar peduncle (left) on FA (fractional anisotropy) skeleton (from dMRI data)
GCST90002952	0.0598094	0.458571	0.105117	0.135457	0.0788022	0.60261	-0.026279	0.49875	-0.180615	0.0411548	-0.0308032	0.79868	0.297678	0.118959	0.0283052	0.68541	-0.00493462	0.964567	0.0311457	0.719872	0.0452613	0.744082	-0.0148722	0.611601	-0.0142005	0.69411	-0.0190154	0.842925	aparc-a2009s_lh_volume_G-postcentral	Volume of G-postcentral in the left hemisphere generated by parcellation of the white surface using Destrieux (a2009s) parcellation
GCST90004404	-0.00298376	0.962904	-0.0541524	0.572624	0.0259876	0.776281	0.0834964	0.31929	-0.0525995	0.719287	-0.0638722	0.497257	-0.235035	0.137901	-0.0937584	0.510813	-0.360391	0.0678097	-0.0504247	0.720354	-0.458223	0.0411528	0.0438015	0.418097	0.0998733	0.211776	-0.0600697	0.3922	IDP_dMRI_TBSS_OD_Genu_of_corpus_callosum	Mean OD (orientation dispersion index) in genu of corpus callosum on FA (fractional anisotropy) skeleton (from dMRI data)
GCST90002516	0.23704	0.315106	-0.0168527	0.932437	0.398543	0.171254	0.0827252	0.270179	0.199383	0.230665	0.301887	0.17087	0.120225	0.717499	-0.111986	0.627679	-0.386232	0.108325	-0.0658977	0.722208	-0.243525	0.404629	0.207271	0.000891581	0.207432	0.00483766	0.273083	0.114377	IDP_T1_FAST_ROIs_R_front_orb_cortex	Volume of grey matter in Right Frontal Orbital Cortex
GCST90003135	-0.0350228	0.815276	-0.0543326	0.752369	0.048353	0.64869	-0.0184354	0.843373	0.330562	0.0392102	0.160112	0.177481	0.0780552	0.741241	0.122498	0.318404	0.166665	0.384067	0.0541657	0.7226	0.0971375	0.685172	0.0453463	0.481353	0.0676405	0.292315	0.108011	0.22262	aparc-Desikan_rh_area_superiorparietal	Area of superiorparietal in the right hemisphere generated by parcellation of the white surface using Desikan-Killiany parcellation
GCST90004398	-0.0114852	0.842928	-0.0367929	0.515557	-0.00141847	0.982189	0.0454891	0.375573	0.13335	0.0968722	-0.0149006	0.845093	-0.00458479	0.974543	-0.104426	0.262245	-0.311494	0.0149919	-0.0356602	0.724986	-0.380745	0.0367158	0.04465	0.360572	0.0221537	0.622923	-0.00595381	0.908967	IDP_dMRI_ProbtrackX_ICVF_str_l	Weighted-mean ICVF (intra-cellular volume fraction) in tract left superior thalamic radiation (from dMRI data)
GCST90004298	-0.0854291	0.111718	-0.0398437	0.620129	-0.110318	0.112154	-0.0491285	0.284596	0.0580257	0.547822	0.161713	0.0524158	-0.431425	0.0389717	0.0541218	0.727542	0.0971027	0.487495	0.0613642	0.725319	0.266737	0.127304	-0.0343332	0.398929	-0.0470736	0.351652	-0.0894954	0.203058	IDP_dMRI_ProbtrackX_L2_unc_l	Weighted-mean L2 in tract left uncinate fasciculus (from dMRI data)
GCST90004239	-0.0323707	0.73551	0.0666698	0.519668	-0.105803	0.254785	-0.115804	0.026552	-0.173893	0.188525	0.0977458	0.339818	0.135299	0.423895	-0.0187263	0.924076	0.0523101	0.856577	0.0517391	0.725336	0.158432	0.492684	-0.0690393	0.294452	-0.0947721	0.164857	0.0415476	0.579309	IDP_dMRI_ProbtrackX_MD_ptr_r	Weighted-mean MD (mean diffusivity) in tract right posterior thalamic radiation (from dMRI data)
GCST90003670	0.197504	0.121907	0.36262	0.0575924	0.110689	0.487568	-0.222253	0.0365761	-0.56711	0.015374	-0.00659678	0.985518	0.194466	0.569079	-0.247423	0.239155	-0.244305	0.459181	-0.0917048	0.726042	-0.240646	0.560244	-0.249071	0.00206847	0	1	0	1	aparc-a2009s_lh_thickness_S-precentral-inf-part	Mean thickness of S-precentral-inf-part in the left hemisphere generated by parcellation of the white surface using Destrieux (a2009s) parcellation
GCST90003396	-0.0818882	0.492833	-0.147473	0.253737	-0.0513632	0.647023	0.0106292	0.866829	0.327981	0.0948958	0.448618	0.0054631	-0.0763186	0.70826	0.0712285	0.692382	-0.153322	0.585164	0.0787051	0.728837	-0.605377	0.0829029	0.0826984	0.0954371	0.0543157	0.359318	0.281426	0.00186521	aparc-a2009s_rh_area_G-pariet-inf-Supramar	Area of G-pariet-inf-Supramar in the right hemisphere generated by parcellation of the white surface using Destrieux (a2009s) parcellation
Mean_postcentral_thickavg_20200522_noGC	0.590566	0.323396	1.1775	0.145135	0.280931	0.674609	-0.0697204	0.897893	-2.14814	0.0244407	-0.667364	0.405512	0.241955	0.880156	-0.0992741	0.910943	1.51368	0.271673	-0.378939	0.729578	1.81447	0.292763	-0.240905	0.589276	-0.301528	0.622936	-0.873891	0.137154	NA	NA
GCST90003400	-0.190386	0.134973	-0.0929946	0.578824	-0.25959	0.0157283	0.0488099	0.426578	-0.040487	0.765171	0.187397	0.40557	0.0417675	0.832552	0.20123	0.395417	0.440631	0.241817	0.0845372	0.730359	0.368264	0.238424	0.0109271	0.817416	0.0536923	0.38733	0.113633	0.194854	aparc-a2009s_rh_area_G-precuneus	Area of G-precuneus in the right hemisphere generated by parcellation of the white surface using Destrieux (a2009s) parcellation
Mean_lateralorbitofrontal_thickavg_20200522_noGC	-4.88412	1.88612e-05	-3.00409	0.0789646	-5.77585	4.94608e-05	-2.42485	0.257269	-4.64967	0.0880402	0.454118	0.839256	-2.92017	0.535918	-1.39161	0.496165	0.336785	0.916283	-0.855962	0.733406	1.28692	0.749084	-2.51641	0.277566	-2.63225	0.234754	-1.14945	0.723543	NA	NA
GCST90004326	-0.0923299	0.0732517	-0.0181842	0.813634	-0.140355	0.0292734	-0.0535834	0.273199	0.117413	0.296743	0.167792	0.0434606	-0.271929	0.209275	0.137172	0.422875	0.144969	0.429412	0.0788955	0.7359	0.195056	0.3793	-0.0229089	0.653695	-0.0649509	0.128627	-0.0511477	0.566501	IDP_dMRI_ProbtrackX_L3_unc_r	Weighted-mean L3 in tract right uncinate fasciculus (from dMRI data)
GCST90002604	-0.00939876	0.885009	-0.0550773	0.57062	0.017738	0.826859	0.0354431	0.600106	0.0612933	0.628632	0.125817	0.151809	0.294312	0.0464678	-0.0892648	0.360263	-0.103358	0.499697	-0.0482107	0.73828	0.0116928	0.959242	0.0441968	0.431862	0.0520052	0.542503	0.083759	0.22671	aseg_global_volume_WM-hypointensities	Volume of WM-hypointensities in the whole brain generated by subcortical volumetric segmentation (aseg)
GCST90004390	-0.0112719	0.793523	-0.00542911	0.908408	-0.0149113	0.758623	0.0819805	0.0101149	0.124909	0.02363	-0.0345396	0.441675	-0.0435096	0.564661	-0.0243664	0.736406	-0.0597119	0.601021	-0.0294221	0.738693	-0.0427288	0.771488	0.0521611	0.0786774	0.0723986	0.0207687	0.0060613	0.866638	IDP_dMRI_ProbtrackX_ICVF_ilf_r	Weighted-mean ICVF (intra-cellular volume fraction) in tract right inferior longitudinal fasciculus (from dMRI data)
GCST90004158	-0.0100935	0.87124	0.0566351	0.543269	-0.0533598	0.583394	-0.193673	0.00937228	-0.145618	0.197804	0.0864894	0.374707	-0.0631767	0.699349	0.0624607	0.65149	0.201887	0.410026	0.044657	0.740791	0.215814	0.366503	-0.1321	0.00362982	-0.150459	0.00481562	-0.059128	0.614161	IDP_dMRI_TBSS_L2_Cingulum_cingulate_gyrus_L	Mean L2 in cingulum cingulate gyrus (left) on FA (fractional anisotropy) skeleton (from dMRI data)
GCST90003263	0.0200084	0.901702	-0.0561267	0.767638	0.0461934	0.739672	0.159957	0.285363	0.610185	0.000175226	0.353755	0.0270445	0.118074	0.700145	-0.0769073	0.628604	-0.317165	0.205683	-0.0828795	0.741126	-0.723343	0.020319	0.241389	0.082285	0.209341	0.114987	0.367874	0.000358864	aparc-DKTatlas_lh_area_supramarginal	Area of supramarginal in the left hemisphere generated by parcellation of the white surface using DKT parcellation
GCST90002716	0.0747038	0.584157	0.0120362	0.941691	0.117554	0.526492	0.0867693	0.528497	0.607806	0.000528578	-0.0672827	0.664202	0.647715	0.0326055	0.0231425	0.896731	-0.0778617	0.829314	0.0725482	0.741706	-0.0177316	0.959527	0.0880696	0.301818	0.127215	0.53738	0.155404	0.228609	ThalamNuclei_lh_volume_L-Sg	Volume of L-Sg in the left hemisphere generated by subcortical volumetric sub-segmentation of the Thalamic Nuclei
GCST90003472	0.00307806	0.980527	0.159254	0.398523	-0.070527	0.702666	-0.200091	0.0794494	-0.389025	0.0274646	-0.295207	0.130159	-0.31744	0.212424	-0.0423233	0.937066	-0.0177101	0.969394	0.157083	0.741746	-0.181851	0.792941	-0.256492	2.71076e-05	-0.233007	0.0244381	-0.281083	0.0152283	aparc-Desikan_lh_thickness_superiorfrontal	Mean thickness of superiorfrontal in the left hemisphere generated by parcellation of the white surface using Desikan-Killiany parcellation
GCST90003837	0.0189909	0.712425	-0.0522619	0.435989	0.0563736	0.39694	-0.0119587	0.714179	-0.0328457	0.638847	-0.0768041	0.222534	-0.0876496	0.326051	-0.0581984	0.48351	-0.161327	0.1768	-0.0384128	0.742259	-0.151013	0.235715	-0.0246178	0.388996	-0.0200971	0.503833	-0.0854868	0.0336726	wg_rh_intensity-contrast_lateraloccipital	Grey-white contrast in lateraloccipital in the right hemisphere calculated as a percentage of the mean gray-white matter intensity from Desikan-Killiany parcellation
GCST90003079	0	1	0.207534	0.223597	0.343703	0.0154071	0.332113	5.23085e-06	0.452213	0.00538537	0.153719	0.270567	0.373303	0.11523	0.057597	0.88821	-0.353327	0.564976	0.122696	0.742806	-0.587822	0.497735	0.342053	6.37219e-10	0.345417	4.00373e-07	0.249837	0.0171811	aparc-Desikan_lh_area_fusiform	Area of fusiform in the left hemisphere generated by parcellation of the white surface using Desikan-Killiany parcellation
GCST90002760	0.0573093	0.833443	0.00472922	0.991023	0.0898384	0.559055	-0.0628788	0.639734	0.0168313	0.937501	-0.0371911	0.781812	-0.0646687	0.773999	-0.240416	0.291681	-0.722394	0.0438131	-0.0915877	0.745913	-0.431688	0.333353	-0.0523257	0.651313	0.0276531	0.892047	0.016428	0.887061	ThalamNuclei_lh_volume_LD	Volume of LD in the left hemisphere generated by subcortical volumetric sub-segmentation of the Thalamic Nuclei
GCST90002589	0.027639	0.690799	-0.0597078	0.629363	0.0936498	0.304064	0.0545754	0.340159	0.14596	0.391475	-0.0352138	0.719611	0.0159583	0.922915	-0.101578	0.559347	0.0062045	0.97163	-0.0858417	0.747042	0.0837676	0.702129	0.0884506	0.022834	0.0794783	0.0991107	0.0364059	0.674315	IDP_T1_FAST_ROIs_R_cerebellum_X	Volume of grey matter in Right X Cerebellum
GCST90004509	0.036039	0.586827	0.0791286	0.425302	0.00527089	0.949232	0.078291	0.170519	0.179701	0.141631	0.209308	0.0491753	-0.0268083	0.914468	0.0372149	0.871591	0.180569	0.394737	-0.0961078	0.747285	0.126031	0.635065	0.0696267	0.0979257	0.0485474	0.352216	0.0796546	0.49054	IDP_dMRI_TBSS_ISOVF_External_capsule_R	Mean ISOVF (isotropic or free water volume fraction) in external capsule (right) on FA (fractional anisotropy) skeleton (from dMRI data)
GCST90002973	-0.228863	0.00865669	-0.342871	0.00862666	-0.159819	0.142256	-0.0488842	0.495861	-0.108644	0.5323	-0.305084	0.042203	-0.0436644	0.848925	0.059936	0.806289	0.424415	0.123716	0.0975831	0.747785	0.411167	0.234426	-0.0811492	0.135552	-0.0695944	0.346681	-0.0598303	0.679331	aparc-a2009s_lh_volume_S-circular-insula-sup	Volume of S-circular-insula-sup in the left hemisphere generated by parcellation of the white surface using Destrieux (a2009s) parcellation
GCST90004199	0.0120725	0.912556	0.0277376	0.798547	-0.00164591	0.989946	-0.0844081	0.0492761	-0.179859	0.0583774	0.0133058	0.92339	0.016342	0.926918	-0.0520093	0.609724	-0.0873551	0.67781	-0.0310639	0.749846	-0.0992856	0.657459	-0.0375232	0.373722	-0.0778275	0.065252	-0.0515169	0.529797	IDP_dMRI_TBSS_L3_Posterior_thalamic_radiation_R	Mean L3 in posterior thalamic radiation (right) on FA (fractional anisotropy) skeleton (from dMRI data)
GCST90003951	0.121059	0.133504	0.0115427	0.911327	0.19444	0.0246613	0.110988	0.0593417	-0.0227195	0.892501	-0.188039	0.0937315	0.310097	0.445722	-0.237863	0.428164	-0.112075	0.653087	-0.135958	0.749923	-0.232324	0.45874	0.0778148	0.250103	0.118363	0.0315523	0.0741803	0.625739	IDP_dMRI_ProbtrackX_FA_unc_r	Weighted-mean FA (fractional anisotropy) in tract right uncinate fasciculus (from dMRI data)
GCST90003307	0.108563	0.0287448	0.205633	0.00564599	0.0483606	0.43477	0.0400728	0.280689	0.0625889	0.475233	-0.0787697	0.342392	-0.0648164	0.640356	0.00523298	0.952073	-0.0218546	0.89295	0.0341632	0.751571	0.00965022	0.954934	0.00746828	0.811183	0.011313	0.828653	-0.0750865	0.167499	aparc-a2009s_lh_area_G-cuneus	Area of G-cuneus in the left hemisphere generated by parcellation of the white surface using Destrieux (a2009s) parcellation
GCST90005514	0.0581938	0.787505	-0.0175197	0.944606	0.0969406	0.597411	0.00760873	0.939226	-0.0562883	0.930921	0.304969	0.467311	0.0338451	0.915864	-0.0640837	0.799219	-0.200668	0.614331	-0.0979203	0.752084	-1.04838	0.0307746	0.0247594	0.893153	-0.0678947	0.773979	0.172183	0.630417	rfMRI connectivity (ICA100 edge 661)
GCST90003045	-0.253458	0.0339131	-0.258279	0.148824	-0.240242	0.107258	-0.0539656	0.593029	-0.565093	0.0114242	-0.395968	0.258042	-0.281767	0.384516	-0.0687101	0.717086	-0.205864	0.640305	-0.0741662	0.753603	0.0424314	0.95532	-0.159705	0.0370097	-0.203798	0.0321339	-0.298826	0.227662	aparc-a2009s_rh_volume_S-circular-insula-ant	Volume of S-circular-insula-ant in the right hemisphere generated by parcellation of the white surface using Destrieux (a2009s) parcellation
GCST90004244	-0.0716398	0.140245	-0.0189331	0.794508	-0.104771	0.0841941	-0.04318	0.27646	0.0209693	0.821358	0.150279	0.0472185	-0.40012	0.0202659	0.0409189	0.759828	0.0888371	0.498874	0.0472355	0.753853	0.234769	0.153727	-0.0320988	0.348968	-0.0456435	0.2813	-0.0727724	0.236779	IDP_dMRI_ProbtrackX_MD_unc_l	Weighted-mean MD (mean diffusivity) in tract left uncinate fasciculus (from dMRI data)
GCST90002734	0.235337	0.235867	0.0978196	0.621266	0.340912	0.106022	-0.0783279	0.386663	-0.172431	0.412819	0.0951161	0.420277	-0.174695	0.377984	-0.123353	0.66768	-0.349647	0.156804	-0.107278	0.756603	-0.806802	0.0187446	-0.00935256	0.913376	-0.0262557	0.759518	0.0310557	0.761143	ThalamNuclei_lh_volume_VLp	Volume of VLp in the left hemisphere generated by subcortical volumetric sub-segmentation of the Thalamic Nuclei
GCST90005585	-0.0994104	0.564898	0.107405	0.83087	-0.249776	0.0823042	-0.000422758	0.995961	-0.277688	0.128393	0.219321	0.174972	0.0336465	0.90017	0.18773	0.35959	0.490844	0.127221	0.0918749	0.760603	0.208527	0.603198	0.0478053	0.460625	0.0923241	0.243396	0.26092	0.0314809	rfMRI connectivity (ICA100 edge 732)
GCST90004499	-0.0702616	0.197124	-0.0656401	0.42076	-0.0714077	0.293744	0.0109156	0.894139	0.209852	0.0416993	-0.0848953	0.339886	-0.161123	0.302629	0.0118293	0.947316	0.127581	0.51684	-0.0801431	0.7621	0.105091	0.69347	-0.0071936	0.897087	-0.0238193	0.685018	-0.110042	0.0984132	IDP_dMRI_TBSS_ISOVF_Anterior_corona_radiata_R	Mean ISOVF (isotropic or free water volume fraction) in anterior corona radiata (right) on FA (fractional anisotropy) skeleton (from dMRI data)
GCST90003531	-0.182687	0.241106	0.165978	0.714091	-0.425441	0.0288092	-0.138895	0.122222	-0.231435	0.233462	-0.0996449	0.556538	0.308716	0.28599	-0.0824175	0.83601	-0.144246	0.816415	-0.139231	0.767012	0.851175	0.29601	-0.0912662	0.182202	-0.0997079	0.240476	0.152808	0.330231	BA-exvivo_rh_thickness_BA4a	Mean thickness of BA4a in the right hemisphere generated by parcellation of the white surface using BA_exvivo parcellation
GCST90004377	0.0745078	0.242837	0.0313213	0.702943	0.10177	0.121548	0.0976174	0.00438311	0.140505	0.111458	-0.0792669	0.200959	-0.0512311	0.586962	-0.0275059	0.771864	-0.16246	0.269719	-0.0348844	0.769298	-0.217628	0.235429	0.0667243	0.0865367	0.0889805	0.060812	0.00784056	0.882526	IDP_dMRI_ProbtrackX_ICVF_atr_l	Weighted-mean ICVF (intra-cellular volume fraction) in tract left anterior thalamic radiation (from dMRI data)
GCST90004293	-0.0955785	0.164376	0.0331248	0.747417	-0.173829	0.0429908	-0.124362	0.0317227	-0.240332	0.0773565	0.22487	0.111863	0.12538	0.500028	-0.0019429	0.99302	0.0590545	0.859357	0.0477053	0.770066	0.152192	0.592706	-0.0848936	0.0532639	-0.109259	0.0445178	0.0910218	0.270444	IDP_dMRI_ProbtrackX_L2_ptr_r	Weighted-mean L2 in tract right posterior thalamic radiation (from dMRI data)
Mean_fusiform_thickavg_20200522_noGC	0.388336	0.878104	-0.168297	0.9256	0.835944	0.775373	-3.16107	0.00364808	-3.06683	0.270931	-3.93644	0.00499201	-5.96121	0.015189	0.0218972	0.990402	-0.705695	0.788023	-0.777271	0.77265	0.0795055	0.980942	-3.34846	0.00346435	-3.10808	0.0149398	-4.27768	4.14126e-05	NA	NA
GCST90003939	0.0356311	0.557786	0.0418961	0.619404	0.0275978	0.675808	0.13616	0.00182636	0.169511	0.0532042	-0.0814101	0.34085	-0.101514	0.356132	-0.0342463	0.757378	-0.150823	0.327878	0.0316896	0.772868	-0.118206	0.592911	0.0821957	0.0434305	0.105903	0.00555664	-0.0552755	0.302916	IDP_dMRI_ProbtrackX_FA_ilf_l	Weighted-mean FA (fractional anisotropy) in tract left inferior longitudinal fasciculus (from dMRI data)
GCST90002761	0.193832	0.0253948	0.162885	0.166549	0.209382	0.0329706	0.14633	0.0412907	0.10281	0.509373	0.00943575	0.925947	0.125404	0.460943	-0.112689	0.389732	0.0206702	0.92627	0.0469714	0.773314	-0.118317	0.649925	0.150527	0.00504786	0.203465	0.0117358	0.102837	0.208229	ThalamNuclei_rh_volume_LD	Volume of LD in the right hemisphere generated by subcortical volumetric sub-segmentation of the Thalamic Nuclei
GCST90003903	0.0838547	0.315356	-0.0578368	0.643426	0.175143	0.0933411	0.157716	0.0255178	0.210101	0.239567	-0.178386	0.300801	-0.181239	0.424176	-0.0131207	0.970188	-0.1235	0.810258	-0.0626875	0.773767	-0.233687	0.560246	0.105248	0.0908238	0.144473	0.0293725	-0.069396	0.490362	IDP_dMRI_TBSS_FA_Posterior_corona_radiata_R	Mean FA (fractional anisotropy) in posterior corona radiata (right) on FA skeleton (from dMRI data)
GCST90003684	-0.0357504	0.782528	0.00674156	0.972241	-0.0455161	0.77824	-0.0901289	0.381715	-0.489379	0.121883	-0.378749	0.12264	-0.0766976	0.817363	-0.358314	0.290767	-0.338797	0.524262	-0.117615	0.775157	-1.22041	0.06494	-0.164232	0.0949012	-0.194112	0.0487364	-0.17136	0.250258	aparc-a2009s_rh_thickness_G+S-cingul-Mid-Post	Mean thickness of G+S-cingul-Mid-Post in the right hemisphere generated by parcellation of the white surface using Destrieux (a2009s) parcellation
GCST90003225	0.0956343	0.26501	0.136462	0.288012	0.0762897	0.476092	-0.0463364	0.601518	-0.0814449	0.800038	0.0836156	0.656679	0.457539	0.0478819	0.0605191	0.681816	0.0230968	0.920322	0.0521804	0.776095	0.166046	0.565709	0.0505067	0.683597	0.0750281	0.588901	0.124781	0.469003	BA-exvivo_rh_area_BA4a	Area of BA4a in the right hemisphere generated by parcellation of the white surface using BA_exvivo parcellation
GCST90004117	-0.0155529	0.922869	-0.0616386	0.77406	0.0257019	0.84348	-0.0646959	0.66561	-0.365501	0.0520579	-0.236477	0.0576696	-0.180836	0.538922	-0.08434	0.597873	-0.226026	0.366837	-0.0561738	0.777334	0.0648277	0.84129	-0.135388	0.350442	-0.154199	0.244242	-0.228638	0.0439043	IDP_dMRI_TBSS_L1_Superior_fronto-occipital_fasciculus_R	Mean L1 in superior fronto-occipital fasciculus (right) on FA (fractional anisotropy) skeleton (from dMRI data)
GCST90003825	-0.00502491	0.943923	-0.0743077	0.486937	0.0306019	0.73161	0.168386	0.00569893	0.221133	0.101138	0.00487391	0.97524	0.0423271	0.827695	-0.0391099	0.767603	0.0256965	0.902044	-0.0460322	0.779079	-0.0890583	0.78923	0.146106	0.00560394	0.180093	0.00160967	0.104204	0.420716	wg_lh_intensity-contrast_transversetemporal	Grey-white contrast in transversetemporal in the left hemisphere calculated as a percentage of the mean gray-white matter intensity from Desikan-Killiany parcellation
GCST90003122	0.206501	0.226842	0.271496	0.0655836	0.147206	0.604098	0.139187	0.289581	0.471855	0.00894911	0.131724	0.400212	0.112788	0.667737	0.0776142	0.646281	-0.0923606	0.809721	0.0589462	0.779685	-0.278462	0.462563	0.137615	0.0263447	0.189533	0.0784284	0.198399	0.089685	aparc-Desikan_rh_area_parahippocampal	Area of parahippocampal in the right hemisphere generated by parcellation of the white surface using Desikan-Killiany parcellation
GCST90002727	-0.255447	0.0435085	-0.289926	0.115864	-0.240305	0.0815692	0.0765209	0.39839	-0.259605	0.400329	-0.217231	0.209545	-0.43273	0.132748	-0.0873258	0.866667	-0.00203928	0.997867	-0.171077	0.779885	-0.234264	0.776544	-0.00432336	0.94982	0.0621576	0.540856	-0.199639	0.194689	ThalamNuclei_lh_volume_MV(Re)	Volume of MV(Re) in the left hemisphere generated by subcortical volumetric sub-segmentation of the Thalamic Nuclei
GCST90004195	-0.0410819	0.835785	0.0811085	0.694003	-0.121596	0.50598	-0.119503	0.240358	-0.378257	0.0167987	-0.249606	0.0384128	-0.1606	0.362364	-0.00918669	0.983331	0.435171	0.238977	-0.12669	0.780629	0.414911	0.365922	-0.178022	0.0483166	-0.0584743	0.325178	-0.169887	0.139466	IDP_dMRI_TBSS_L3_Superior_corona_radiata_R	Mean L3 in superior corona radiata (right) on FA (fractional anisotropy) skeleton (from dMRI data)
GCST90004424	0.117948	0.142669	-0.0153915	0.898271	0.223547	0.0260783	0.140146	0.0313714	0.339983	0.0190908	0.0383856	0.839043	-0.121331	0.715809	0.152894	0.371133	-0.014359	0.957127	-0.0575819	0.784792	-0.238766	0.473985	0.106956	0.0311831	0.101144	0.0984106	-0.0171251	0.908411	IDP_dMRI_TBSS_OD_Anterior_corona_radiata_R	Mean OD (orientation dispersion index) in anterior corona radiata (right) on FA (fractional anisotropy) skeleton (from dMRI data)
GCST90004299	-0.0981875	0.071724	-0.0305755	0.707852	-0.143057	0.0356954	-0.0579899	0.326681	0.0856936	0.504722	0.175533	0.0463818	-0.302564	0.240701	0.165735	0.443862	0.153465	0.515768	0.0799598	0.786559	0.25898	0.293606	-0.0378603	0.498922	-0.0734041	0.143298	-0.0718822	0.455173	IDP_dMRI_ProbtrackX_L2_unc_r	Weighted-mean L2 in tract right uncinate fasciculus (from dMRI data)
GCST90005521	-0.35212	0.00494113	-0.348619	0.0924651	-0.352848	0.0239372	0.0302958	0.768713	-0.114423	0.631526	0.0263665	0.893835	0.0421832	0.898569	-0.233206	0.24049	-0.240983	0.439727	-0.0668017	0.787812	-0.211073	0.586952	-0.0171251	0.869588	-0.0181366	0.896702	-0.0446329	0.761822	rfMRI connectivity (ICA100 edge 668)
GCST90004077	0.0128884	0.814242	0.0858258	0.281925	-0.0265708	0.721319	-0.16688	0.028336	-0.231637	0.0167616	0.00697738	0.927748	0.0538587	0.682006	0.0470395	0.634728	0.213584	0.186701	0.0305244	0.790815	0.300744	0.127872	-0.137517	0.0113953	-0.116871	0.00323035	-0.0200006	0.739398	IDP_dMRI_TBSS_L1_Genu_of_corpus_callosum	Mean L1 in genu of corpus callosum on FA (fractional anisotropy) skeleton (from dMRI data)
GCST90005512	-0.166697	0.0263127	-0.0733416	0.708816	-0.213534	0.0226073	-0.0627132	0.306378	-0.379357	0.00618635	-0.0435257	0.800929	0.0250667	0.89938	0.0503498	0.722778	0.418329	0.0411428	-0.0446026	0.791661	0.331814	0.156128	-0.0778351	0.250887	-0.0939077	0.145841	-0.0827384	0.629057	rfMRI connectivity (ICA100 edge 659)
GCST90002891	-0.0379195	0.834678	-0.122763	0.567958	-0.00140327	0.993112	0.0209624	0.793306	0.546986	0.00262591	0.42095	0.0455935	-0.148605	0.563086	0.0652621	0.661536	-0.152854	0.509057	0.0482838	0.795374	-0.437855	0.128826	0.118751	0.067639	0.0972063	0.193439	0.309906	0.0337987	aparc-DKTatlas_lh_volume_supramarginal	Volume of supramarginal in the left hemisphere generated by parcellation of the white surface using DKT parcellation
GCST90002850	0.166618	0.0525833	0.097147	0.635074	0.228306	0.0332979	0.0153007	0.837452	0.101925	0.756565	0.232981	0.294121	0.2912	0.2235	-0.0256539	0.843966	-0.203651	0.317927	-0.0421913	0.795633	-0.398036	0.229017	0.0362319	0.676767	0.021869	0.787782	0.108694	0.586603	BA-exvivo_rh_volume_BA2	Volume of BA2 in the right hemisphere generated by parcellation of the white surface using BA_exvivo parcellation
Mean_parahippocampal_surfavg_20190429_noGC	0.00232177	0.110315	0.000335564	0.919498	0.00375826	0.00835231	0.00164748	0.366465	0.00366382	0.107084	-0.000279976	0.855525	0.00450879	0.280728	0.000279907	0.889992	-0.000792642	0.843911	0.000607153	0.796637	0.00374969	0.458307	0.00165584	0.354157	0.00314478	0.106881	0.00149915	0.517732	NA	NA
GCST90002718	0.0796253	0.287959	0.00163757	0.989699	0.204274	0.0469808	0.00255855	0.966646	0.0795128	0.552427	0.0636873	0.472699	0.157854	0.414465	0.0777188	0.561265	0.391379	0.062936	-0.0418982	0.79855	0.276346	0.29653	0.0496733	0.328527	0.0788522	0.276165	0.0799834	0.293258	ThalamNuclei_lh_volume_CM	Volume of CM in the left hemisphere generated by subcortical volumetric sub-segmentation of the Thalamic Nuclei
GCST90002649	-0.156041	0.259549	-0.0231903	0.877535	-0.254228	0.0599705	-0.0745834	0.311097	-0.308671	0.00590483	-0.0956151	0.426686	-0.0804407	0.625549	-0.109651	0.493131	-0.0186831	0.933643	-0.0526331	0.798661	-0.0685485	0.788219	-0.12088	0.0319747	-0.205778	0.0043932	-0.0510643	0.70974	AmygNuclei_lh_volume_Basal-nucleus	Volume of Basal-nucleus in the left hemisphere generated by subcortical volumetric sub-segmentation of the Amygdala Nuclei
GCST90004365	-0.0187034	0.647072	-0.0473245	0.390529	-0.00629042	0.913805	0.132826	0.014614	0.124328	0.0647236	-0.0211651	0.714892	0.101109	0.306247	-0.0345988	0.697194	-0.0191062	0.908227	-0.027563	0.799033	-0.0951544	0.634674	0.0912293	0.0401786	0.112087	0.016581	0.0460471	0.349878	IDP_dMRI_TBSS_ICVF_Fornix_cres+Stria_terminalis_R	Mean ICVF (intra-cellular volume fraction) in fornix cres+stria terminalis (right) on FA (fractional anisotropy) skeleton (from dMRI data)
GCST90003774	-0.040839	0.507235	0.113447	0.2522	-0.14027	0.0678656	-0.0844462	0.0399992	-0.0890193	0.229881	-0.0484595	0.451079	0.119897	0.290727	0.0345305	0.813332	0.297842	0.185001	-0.032051	0.799399	0.41721	0.0439522	-0.0684458	0.0282815	-0.0933569	0.0340132	0.00640771	0.908466	aseg_lh_intensity_Accumbens-area	Mean intensity of Accumbens-area in the left hemisphere generated by subcortical volumetric segmentation (aseg)
GCST90002486	-0.162416	0.051731	-0.249365	0.0461476	-0.138752	0.182796	0.0190439	0.783197	0.37735	0.0812743	-0.00305601	0.981777	-0.0656934	0.782514	0.00437553	0.972532	0.054886	0.782265	0.040041	0.799904	-0.168167	0.558516	0.0404938	0.439527	0.0168281	0.794767	0.116107	0.23851	IDP_T1_FAST_ROIs_R_sup_parietal_lobule	Volume of grey matter in Right Superior Parietal Lobule
GCST90004065	-0.0993663	0.392736	0.0925381	0.594843	-0.255115	0.0790066	-0.188536	0.0541832	-0.153855	0.481048	0.201078	0.407781	0.0454315	0.885918	-0.0563201	0.835581	0.0114076	0.970183	-0.0613652	0.800261	0.209807	0.581908	-0.188983	0.0208058	-0.243053	0.00813628	-0.0599321	0.738742	IDP_dMRI_TBSS_MD_Fornix_cres+Stria_terminalis_R	Mean MD (mean diffusivity) in fornix cres+stria terminalis (right) on FA (fractional anisotropy) skeleton (from dMRI data)
Mean_lateraloccipital_thickavg_20200522_noGC	0.107225	0.906876	0.862933	0.605026	-0.480538	0.719662	-1.1664	0.0455282	-2.50616	0.13368	-0.584323	0.598384	-1.27364	0.497355	-2.30407	0.183603	-3.20129	0.236099	-0.808472	0.801169	-2.60494	0.446383	-1.13057	0.0103147	-0.992107	0.113618	-1.33824	0.134268	NA	NA
GCST90002448	0.341326	0.00693129	0.355853	0.327066	0.321272	0.0416532	0.128606	0.239637	-0.0590601	0.842333	-0.135929	0.477593	0.165433	0.607071	0.130832	0.555557	0.479363	0.166419	0.0762276	0.801659	0.47979	0.26741	-0.0511022	0.767189	-0.0841891	0.368789	-0.196331	0.170517	IDP_T1_FIRST_left_accumbens_volume	Volume of left accumbens (from T1 brain image)
GCST90003567	-0.0133643	0.879904	-0.00573258	0.965443	-0.0210387	0.848922	-0.153256	0.0262723	-0.0018252	0.994456	-0.150912	0.251665	0.0504985	0.819349	-0.130596	0.383226	-0.284676	0.224353	0.0455878	0.806493	-0.342577	0.24433	-0.110449	0.106531	-0.102078	0.120514	-0.054902	0.644207	aparc-DKTatlas_lh_thickness_superiorparietal	Mean thickness of superiorparietal in the left hemisphere generated by parcellation of the white surface using DKT parcellation
GCST90002798	-0.0348545	0.855425	-0.122819	0.590796	0.00287712	0.986519	0.0233326	0.780841	0.574415	0.00255574	0.446564	0.0328964	-0.150508	0.576369	0.0661147	0.67193	-0.161788	0.504717	0.0477126	0.806681	-0.46471	0.123804	0.12618	0.0520376	0.103514	0.186648	0.328695	0.023215	aparc-Desikan_lh_volume_supramarginal	Volume of supramarginal in the left hemisphere generated by parcellation of the white surface using Desikan-Killiany parcellation
GCST90003279	0.338996	0.00219152	0.286515	0.0839161	0.363811	0.041899	0.231461	0.00956299	0.417704	0.0347544	0.143254	0.402823	-0.000351124	0.999026	-0.0850822	0.675829	-0.471729	0.142734	-0.0618248	0.807297	-0.666	0.0993549	0.169252	0.0126593	0.249428	0.00437501	0.22417	0.0797646	aparc-DKTatlas_rh_area_parahippocampal	Area of parahippocampal in the right hemisphere generated by parcellation of the white surface using DKT parcellation
GCST90004242	0.0303793	0.686447	0.210147	0.0466576	-0.0812463	0.329485	-0.13938	0.0492686	-0.272103	0.00810872	-0.0894866	0.426803	-0.155306	0.341821	0.227577	0.323585	0.216105	0.48764	0.0592224	0.808767	0.0125503	0.974653	-0.143002	0.0402392	-0.160137	0.0208879	-0.158114	0.0912138	IDP_dMRI_ProbtrackX_MD_str_l	Weighted-mean MD (mean diffusivity) in tract left superior thalamic radiation (from dMRI data)
GCST90002920	-0.103087	0.436187	-0.132032	0.438266	-0.0967553	0.384576	-0.0439038	0.512784	0.321258	0.0229122	0.287884	0.0520684	-0.114045	0.546232	0.0482853	0.688715	0.116679	0.535997	0.0354413	0.813312	0.0169423	0.942655	0.0183904	0.686691	0.00887778	0.872819	0.183681	0.0290262	aparc-DKTatlas_rh_volume_superiorparietal	Volume of superiorparietal in the right hemisphere generated by parcellation of the white surface using DKT parcellation
GCST90003839	0.0871964	0.0701028	0.0765947	0.35443	0.0965567	0.0951001	0.131077	0.00317537	-0.0169169	0.826531	-0.0393273	0.672884	0.0857574	0.446109	-0.0383825	0.598935	-0.197417	0.155765	0.0214276	0.813512	-0.256589	0.133334	0.0879067	0.0237237	0.0852783	0.0315574	0.046129	0.456886	wg_rh_intensity-contrast_lingual	Grey-white contrast in lingual in the right hemisphere calculated as a percentage of the mean gray-white matter intensity from Desikan-Killiany parcellation
GCST90003084	-0.283655	0.450671	-0.439918	0.00307915	-0.185763	0.72289	0.0856403	0.400582	-0.499205	0.0961345	0.381838	0.189145	-0.400614	0.10928	-0.0678924	0.790392	-0.106877	0.702513	-0.0713702	0.815009	0.117368	0.689585	-0.276981	0.358337	0.0322022	0.735711	0.23861	0.150301	aparc-Desikan_lh_area_lateralorbitofrontal	Area of lateralorbitofrontal in the left hemisphere generated by parcellation of the white surface using Desikan-Killiany parcellation
GCST90004250	-0.0279235	0.794531	0.177623	0.267975	-0.167912	0.210113	-0.048007	0.59343	-0.406302	0.0433356	0.10182	0.554433	-0.0594695	0.838256	-0.077121	0.75537	-0.0892839	0.818204	0.0703302	0.816441	-0.609125	0.218386	-0.075152	0.269827	-0.096827	0.249869	0.0539281	0.672495	IDP_dMRI_ProbtrackX_L1_cgc_l	Weighted-mean L1 in tract left cingulate gyrus part of cingulum (from dMRI data)
GCST90004034	0.15435	0.443737	0.297915	0.169076	0.0881068	0.67372	-0.0593597	0.439986	-0.129044	0.720493	-0.0632626	0.79499	0.113901	0.645469	-0.144963	0.506394	-0.686256	0.0433472	-0.0734117	0.817275	-1.02394	0.0158587	-0.0338783	0.562	-0.0937639	0.343561	0.0681966	0.578214	IDP_dMRI_TBSS_MD_Corticospinal_tract_L	Mean MD (mean diffusivity) in corticospinal tract (left) on FA (fractional anisotropy) skeleton (from dMRI data)
GCST90003226	0.0834449	0.0522002	0.132004	0.0403056	0.0568152	0.289441	-0.0371454	0.364505	-0.178249	0.0283425	-0.00258605	0.970306	0.170474	0.188038	-0.0223372	0.814295	-0.0835867	0.525495	-0.0265395	0.817597	-0.0110593	0.953565	-0.0358444	0.178217	-0.0345246	0.333072	-0.0210095	0.674396	BA-exvivo_rh_area_BA4p	Area of BA4p in the right hemisphere generated by parcellation of the white surface using BA_exvivo parcellation
GCST90002465	0.208571	0.148974	0.238308	0.097768	0.202578	0.235023	0.204834	0.00742606	-0.155378	0.442143	-0.187938	0.200644	0.172642	0.484148	-0.11494	0.565144	0.117834	0.743825	-0.056227	0.818865	-0.00718801	0.98812	0.0868504	0.401549	0.248171	0.253007	0.00560941	0.980903	IDP_T1_FAST_ROIs_L_temporal_pole	Volume of grey matter in Left Temporal Pole
GCST90003970	-0.180594	0.0835946	-0.0982756	0.470627	-0.23938	0.0160529	0.0711161	0.362403	-0.00624416	0.962838	0.0427442	0.722408	0.0677945	0.727009	-0.0605017	0.746864	0.127543	0.587716	-0.0660939	0.81905	0.191114	0.506003	0.00236022	0.970017	-0.0070992	0.924461	-0.10468	0.374429	IDP_dMRI_TBSS_MO_Posterior_limb_of_internal_capsule_R	Mean MO (diffusion tensor mode) in posterior limb of internal capsule (right) on FA (fractional anisotropy) skeleton (from dMRI data)
GCST90004028	0.100631	0.461427	0.099538	0.505843	0.0957759	0.466473	-0.0200886	0.838324	-0.0773372	0.740417	-0.0527916	0.73431	-0.242888	0.274123	-0.0545768	0.808056	-0.427144	0.0193935	0.0603937	0.821557	-0.542929	0.0174684	-0.0466483	0.651218	-0.0598396	0.63983	-0.0512038	0.727543	IDP_dMRI_TBSS_MD_Pontine_crossing_tract	Mean MD (mean diffusivity) in pontine crossing tract on FA (fractional anisotropy) skeleton (from dMRI data)
GCST90003110	0	1	0	1	0	1	-0.16787	0.0653393	-0.0028217	0.993068	-0.407507	0.0196654	-0.653253	0.0263012	-0.188844	0.352863	-0.449821	0.463919	-0.0559337	0.82445	-0.257673	0.720385	-0.145022	0.0368484	-0.15697	0.209846	-0.3309	0.0119356	aparc-Desikan_rh_area_caudalmiddlefrontal	Area of caudalmiddlefrontal in the right hemisphere generated by parcellation of the white surface using Desikan-Killiany parcellation
GCST90003177	-0.0881634	0.492526	-0.151367	0.674535	-0.0592753	0.711504	-0.168996	0.0653266	0.000339244	0.999172	-0.409944	0.0197524	-0.658291	0.026164	-0.189778	0.356825	-0.450676	0.471579	-0.056348	0.825406	-0.255107	0.727287	-0.121136	0.0361925	-0.131763	0.0931755	-0.198503	0.204925	aparc-pial_rh_area_caudalmiddlefrontal	Area of caudalmiddlefrontal in the right hemisphere generated by parcellation of the pial surface using Desikan-Killiany parcellation
GCST90002648	-0.182036	0.148305	-0.15779	0.258754	-0.213131	0.106261	-0.0764559	0.380285	-0.332913	0.00154172	-0.171478	0.0634533	0.0157155	0.918847	0.00134422	0.99223	0.162459	0.382654	0.0468769	0.826118	0.0650594	0.780092	-0.129315	0.029179	-0.171169	0.173558	-0.179547	0.069487	AmygNuclei_lh_volume_Lateral-nucleus	Volume of Lateral-nucleus in the left hemisphere generated by subcortical volumetric sub-segmentation of the Amygdala Nuclei
GCST90004545	0.0179559	0.890751	0.0258592	0.909824	0.0080635	0.94434	-0.0426461	0.481163	0.223253	0.144733	0.339657	0.00324014	0.211939	0.271471	0.0333088	0.913308	-0.0477406	0.856495	0.0837166	0.82656	-0.0872299	0.792107	0.0501226	0.266177	-0.0360847	0.548822	0.202847	0.0267022	IDP_dMRI_ProbtrackX_ISOVF_ptr_r	Weighted-mean ISOVF (isotropic or free water volume fraction) in tract right posterior thalamic radiation (from dMRI data)
GCST90002560	0.0987597	0.120575	0.00048798	0.997239	0.158166	0.0300717	0.0457368	0.202363	0.0889503	0.17043	0.0480096	0.394623	-0.0591014	0.578115	0.0485425	0.754678	-0.107191	0.70536	0.0301107	0.82668	-0.234363	0.489254	0.0495003	0.0294233	0.0446103	0.183046	-0.0128244	0.763856	IDP_T1_FAST_ROIs_R_ventral_striatum	Volume of grey matter in Right Ventral Striatum
GCST90004342	-0.00113124	0.977541	-0.00628077	0.930848	-0.00444058	0.933666	0.0368002	0.264642	0.153078	0.0138778	-0.0894238	0.108756	-0.16361	0.068813	-0.0267831	0.649702	-0.0370759	0.692388	-0.0147457	0.82677	-0.182343	0.135254	0.00917663	0.741397	0.0583777	0.0243293	-0.0600421	0.121939	IDP_dMRI_TBSS_ICVF_Cerebral_peduncle_L	Mean ICVF (intra-cellular volume fraction) in cerebral peduncle (left) on FA (fractional anisotropy) skeleton (from dMRI data)
GCST90003267	0	1	0	1	0	1	-0.16413	0.0653526	0.00474015	0.988089	-0.397731	0.0198975	-0.640252	0.0259935	-0.183827	0.362681	-0.43458	0.482657	-0.0547786	0.826815	-0.241599	0.737273	-0.140634	0.0384508	-0.150575	0.23212	-0.325965	0.0113613	aparc-DKTatlas_rh_area_caudalmiddlefrontal	Area of caudalmiddlefrontal in the right hemisphere generated by parcellation of the white surface using DKT parcellation
GCST90002440	-0.122862	0.405176	-0.0247787	0.860304	-0.179962	0.256977	0.0217961	0.832769	0.169846	0.377338	0.255899	0.0245939	0.198906	0.297811	0.0863478	0.560356	0.203912	0.383573	-0.0400203	0.827252	0.174346	0.551281	0.0407946	0.406679	0.00695988	0.931078	0.0924586	0.275197	IDP_T1_FIRST_left_putamen_volume	Volume of left putamen (from T1 brain image)
GCST90003212	0.0557961	0.225192	0.0794253	0.311934	0.0456759	0.426251	-0.0382526	0.52757	-0.195954	0.0249928	-0.0265571	0.722401	0.21407	0.0816558	0.033861	0.623035	0.0406791	0.708999	0.0183852	0.830031	0.186323	0.181218	-0.0422211	0.138651	-0.0439742	0.215702	-0.0331841	0.535789	BA-exvivo_lh_area_BA4p	Area of BA4p in the left hemisphere generated by parcellation of the white surface using BA_exvivo parcellation
GCST90004193	-0.0267467	0.72151	0.0962093	0.270672	-0.116322	0.124388	-0.135636	0.0440774	-0.20005	0.0167854	0.0390797	0.597811	0.108038	0.385795	0.0691193	0.514901	0.229533	0.114015	0.0239537	0.83055	0.274387	0.121349	-0.112586	0.0423663	-0.129274	0.0177834	0.0250136	0.703013	IDP_dMRI_TBSS_L3_Anterior_corona_radiata_R	Mean L3 in anterior corona radiata (right) on FA (fractional anisotropy) skeleton (from dMRI data)
GCST90003887	0.115528	0.206361	-0.0233836	0.86431	0.196379	0.0855752	0.137057	0.0779304	0.227328	0.212282	-0.395387	0.00773709	-0.115421	0.643362	0.172309	0.3508	0.248309	0.388545	0.0486476	0.831366	0.0795485	0.825404	0.0616184	0.296181	0.0928321	0.203964	-0.16072	0.147826	IDP_dMRI_TBSS_FA_Inferior_cerebellar_peduncle_R	Mean FA (fractional anisotropy) in inferior cerebellar peduncle (right) on FA skeleton (from dMRI data)
Mean_rostralanteriorcingulate_thickavg_20200522_noGC	-1.93114	0.0520004	-2.56852	0.0336573	-1.46731	0.244778	-2.11719	0.0092172	-3.73616	0.00100484	-1.30934	0.178936	-2.48809	0.358237	0.68447	0.704355	3.02824	0.165063	-0.365112	0.831669	2.11684	0.439717	-2.27555	0.00393541	-2.21155	0.0150465	-2.04381	0.00492991	NA	NA
GCST90003222	0.038009	0.833153	0.0504121	0.694033	0.0127158	0.958826	-0.012883	0.914407	0.311827	0.0578365	0.286136	0.296721	0.086329	0.716746	0.00271384	0.984625	-0.160612	0.467355	-0.0372836	0.83199	-0.573029	0.036593	0.0847803	0.30123	0.072315	0.327742	0.203928	0.334437	BA-exvivo_rh_area_BA2	Area of BA2 in the right hemisphere generated by parcellation of the white surface using BA_exvivo parcellation
GCST90006342	-0.0649464	0.316358	-0.129324	0.182188	-0.0150423	0.852492	-0.0290609	0.529844	0.0940007	0.35832	0.202249	0.0676945	-0.370026	0.0121079	-0.122333	0.24448	-0.407014	0.0136943	0.0285029	0.83229	-0.557441	0.00689619	-0.0128963	0.750105	-0.0329168	0.452043	0.00381336	0.968478	rfMRI connectivity ICA-features 4	These are not primary variables stored at UKB but are derived from all of the individual connectivity IDPs listed above. The method for estimation of these was described in Elliott et al, Nature, 2018. Code and data to allow their re-estimation can be found at https://www.fmrib.ox.ac.uk/ukbiobank/gwaspaper/index.html
GCST90002845	-0.0153547	0.782697	0.0658713	0.404159	-0.0710942	0.309485	-0.0290343	0.537205	0.0481651	0.609837	-0.0799408	0.513048	-0.0229842	0.905144	0.0989153	0.375369	0.558252	0.00144404	0.0290946	0.832923	0.505418	0.0215717	-0.0332959	0.306349	-0.0409952	0.336234	-0.104823	0.0882772	BA-exvivo_lh_volume_V2	Volume of V2 in the left hemisphere generated by parcellation of the white surface using BA_exvivo parcellation
GCST90002636	0.134924	0.0117205	0.135196	0.0206018	0.142916	0.0194582	0.0113367	0.810161	0.0264444	0.705988	-0.0291587	0.64003	-0.0627433	0.539871	0.119192	0.147976	0.232959	0.0558264	0.0215584	0.833076	0.292955	0.0536451	0.0236481	0.514874	0.0428023	0.286632	-0.0613303	0.283568	aseg_rh_volume_Cerebellum-Cortex	Volume of Cerebellum-Cortex in the right hemisphere generated by subcortical volumetric segmentation (aseg)
GCST90003803	-0.015849	0.737566	-0.0260253	0.649139	-0.00814582	0.904602	0.0321982	0.405194	-0.0959584	0.0831649	-0.0299364	0.637021	-0.00300137	0.974074	-0.0973621	0.100079	-0.252907	0.00544253	-0.0184809	0.834281	-0.187816	0.150407	0.00533473	0.885131	0.0360269	0.305711	0.0115695	0.824864	wg_lh_intensity-contrast_lateralorbitofrontal	Grey-white contrast in lateralorbitofrontal in the left hemisphere calculated as a percentage of the mean gray-white matter intensity from Desikan-Killiany parcellation
Mean_Full_Thickness_20190429_noGC	0.433465	0.663206	1.7265	0.195044	-0.463267	0.715251	-1.60917	0.132761	-2.31088	0.10809	-2.14251	0.0573637	0.0690453	0.980182	-2.53666	0.118712	-4.17473	0.101138	-0.472405	0.834386	-2.77043	0.385547	-1.75104	0.0721734	-1.31031	0.259238	-2.78399	0.0075079	NA	NA
GCST90003535	-0.145442	0.459437	-0.150487	0.572813	-0.122466	0.445371	-0.210416	0.0120637	-0.821959	8.07544e-06	-0.237539	0.215559	-0.347411	0.336459	0.00126693	0.996692	0.215546	0.690326	0.0705931	0.835471	-0.0516165	0.942109	-0.243358	0.000143408	-0.315942	0.000917507	-0.217938	0.135683	BA-exvivo_rh_thickness_BA45	Mean thickness of BA45 in the right hemisphere generated by parcellation of the white surface using BA_exvivo parcellation
GCST90004139	0.0090224	0.925909	0.0908461	0.570564	-0.0518394	0.62	0.0188353	0.853196	0.154334	0.312807	0.154748	0.333585	0.248651	0.331589	-0.133458	0.726608	-0.182626	0.655477	0.0621872	0.835904	-0.153724	0.739878	0.0532893	0.335558	0.00948797	0.907922	0.216161	0.036289	IDP_dMRI_TBSS_L2_Anterior_limb_of_internal_capsule_R	Mean L2 in anterior limb of internal capsule (right) on FA (fractional anisotropy) skeleton (from dMRI data)
GCST90003290	-0.138979	0.37958	-0.280533	0.141306	-0.0502671	0.783593	-0.0965874	0.303908	-0.494447	0.178988	0.0728141	0.685659	0.670821	0.0266939	-0.0957276	0.69298	-0.334449	0.384391	-0.0604128	0.838239	-0.735517	0.129295	-0.0941659	0.189559	0	1	0	1	aparc-DKTatlas_rh_area_rostralmiddlefrontal	Area of rostralmiddlefrontal in the right hemisphere generated by parcellation of the white surface using DKT parcellation
GCST90006350	-0.0597449	0.559593	-0.0206385	0.821684	-0.0754709	0.67282	-0.0711003	0.564193	0.112537	0.474547	-0.0101283	0.940361	-0.0972826	0.541113	-0.0612184	0.556588	-0.352239	0.031186	0.0262764	0.838839	-0.400667	0.0502209	-0.0164726	0.865878	-0.0276055	0.824802	-0.00765398	0.920514	QC_T2_FLAIR-to-T1_linear_alignment_discrepancy	Discrepancy between the T2 FLAIR brain image (linearly-aligned to the T1) and the T1 brain image
GCST90004048	0.00773392	0.937889	0.0332693	0.755394	-0.0112458	0.919589	-0.110819	0.017735	-0.231232	0.00645351	0.0786304	0.262747	0.104591	0.476161	0.0789365	0.481799	0.248661	0.198228	0.0238973	0.842048	0.184629	0.415653	-0.0571681	0.26585	-0.0831131	0.144183	-0.00245259	0.969019	IDP_dMRI_TBSS_MD_Retrolenticular_part_of_internal_capsule_L	Mean MD (mean diffusivity) in retrolenticular part of internal capsule (left) on FA (fractional anisotropy) skeleton (from dMRI data)
GCST90002520	0.153735	0.143573	0.22	0.162019	0.0828543	0.528858	0.102344	0.21609	0.0930623	0.720409	0.126758	0.497468	0.35091	0.188514	0.171042	0.562651	0.417242	0.360291	-0.0611415	0.84418	-0.00346882	0.992902	0.142199	0.0236193	0.133905	0.0842273	0.23188	0.0500906	IDP_T1_FAST_ROIs_R_parahipp_gyrus_post	Volume of grey matter in Right Parahippocampal Gyrus, posterior division
Mean_rostralanteriorcingulate_surfavg_20190429_noGC	-5.70035e-05	0.949083	3.16228e-05	0.972539	-7.03866e-05	0.942729	0.000149723	0.855817	0.000641459	0.582753	-0.00153598	0.0310529	-3.02637e-05	0.983628	-0.000155342	0.875754	0.000346865	0.824371	0.000238629	0.845483	0.000205658	0.916211	7.96549e-05	0.917873	7.66088e-05	0.927162	-0.00036157	0.720093	NA	NA
GCST90002951	-0.062725	0.505706	-0.118027	0.258208	-0.0405208	0.655979	-0.0358312	0.554949	0.284712	0.0227484	-0.0255045	0.813856	-0.0645603	0.719131	-0.001184	0.99108	0.096041	0.581771	-0.0292406	0.846868	0.00976519	0.962198	0.0241377	0.571303	0.0142706	0.787387	0.0344095	0.668776	aparc-a2009s_lh_volume_G-parietal-sup	Volume of G-parietal-sup in the left hemisphere generated by parcellation of the white surface using Destrieux (a2009s) parcellation
GCST90003810	0.131011	0.0577192	0.0302219	0.746093	0.192434	0.00626003	0.13996	0.0122819	-0.0513891	0.662247	0.00233759	0.980254	0.163496	0.266569	-0.0649871	0.579725	-0.261817	0.0465191	0.0274585	0.847921	-0.17877	0.277947	0.0918137	0.0858886	0.123753	0.0192584	0.0487218	0.535354	wg_lh_intensity-contrast_parsorbitalis	Grey-white contrast in parsorbitalis in the left hemisphere calculated as a percentage of the mean gray-white matter intensity from Desikan-Killiany parcellation
GCST90004211	0.00342316	0.95587	0.0325659	0.675872	-0.0175607	0.799878	-0.119507	0.0463291	-0.224913	0.00791697	0.0293083	0.744937	0.117507	0.292534	0.0969248	0.391988	0.198624	0.23249	0.0244791	0.848869	0.0608517	0.795528	-0.0873819	0.100006	-0.108658	0.0599616	0.0162748	0.819096	IDP_dMRI_TBSS_L3_Superior_longitudinal_fasciculus_R	Mean L3 in superior longitudinal fasciculus (right) on FA (fractional anisotropy) skeleton (from dMRI data)
Mean_isthmuscingulate_surfavg_20190429_noGC	0.00129589	0.0473541	0.0012302	0.0818331	0.00128948	0.113536	-9.42227e-06	0.989126	0.00109751	0.431672	-0.000894029	0.206349	0.000862498	0.544507	8.34199e-05	0.940047	0.00102396	0.547815	0.000215902	0.848884	0.000137309	0.939363	0.000228779	0.724909	0.000477542	0.575264	2.59197e-05	0.980407	NA	NA
GCST90004332	-0.183456	0.171621	-0.297694	0.0275725	-0.128457	0.393021	-0.112406	0.498273	-0.12417	0.572086	-0.446117	0.00106662	-0.401694	0.0779084	0.138706	0.441819	0.154906	0.569721	0.0318037	0.850048	-0.0766335	0.773312	-0.142886	0.322419	-0.0977325	0.522447	-0.394525	0.0625086	IDP_dMRI_TBSS_ICVF_Fornix	Mean ICVF (intra-cellular volume fraction) in fornix on FA (fractional anisotropy) skeleton (from dMRI data)
GCST90003848	0.0237775	0.760394	-0.0414667	0.631424	0.059764	0.558541	0.0627679	0.264763	-0.11932	0.348199	-0.22801	0.0106231	-0.367226	0.0148854	-0.104451	0.393678	-0.0110607	0.949215	-0.0219035	0.85053	0.120297	0.510186	-0.0104052	0.863201	0.008653	0.884052	-0.189453	0.00460213	wg_rh_intensity-contrast_postcentral	Grey-white contrast in postcentral in the right hemisphere calculated as a percentage of the mean gray-white matter intensity from Desikan-Killiany parcellation
Mean_transversetemporal_surfavg_20190429_noGC	0.000529214	0.739064	0.00087745	0.563557	0.000151841	0.948147	-0.000317147	0.790126	0.00297483	0.222514	0.000244629	0.869406	0.0027578	0.390559	-0.000379047	0.867759	-0.000293813	0.930041	0.000494945	0.8507	-0.000889217	0.832208	0.000978322	0.317538	0.000139704	0.922776	0.00317625	0.0198718	NA	NA
GCST90002566	-0.0681105	0.574289	-0.166971	0.492528	-0.0228952	0.920287	0.166983	0.0280883	0.267912	0.122523	0.163101	0.179186	-0.108082	0.597578	0.352782	0.301134	0.533931	0.318469	0.0741352	0.851477	-0.229151	0.743493	0.141783	0.0607679	0.175563	0.0460529	0.0569792	0.536321	IDP_T1_FAST_ROIs_L_cerebellum_VI	Volume of grey matter in Left VI Cerebellum
GCST90003415	0.0976991	0.00800679	0.11138	0.0830015	0.0938374	0.175572	-0.0148323	0.625458	-0.103747	0.132413	-0.0433422	0.461936	0.17752	0.25514	-0.0108184	0.913362	-0.0523418	0.584135	-0.0266946	0.852399	-0.0238709	0.881056	-0.00931258	0.684581	-0.00526803	0.852143	-0.0378061	0.37884	aparc-a2009s_rh_area_S-central	Area of S-central in the right hemisphere generated by parcellation of the white surface using Destrieux (a2009s) parcellation
GCST90003173	0.289533	0.0372637	0.392528	0.0592721	0.216969	0.211249	-0.00898897	0.923763	0.220673	0.266349	0.0496627	0.772846	0.64842	0.0243833	0.213103	0.467037	0.364896	0.639188	0.0388252	0.853806	0.634945	0.47772	0.0589891	0.46732	0.0764413	0.369346	0.183369	0.407362	aparc-pial_lh_area_transversetemporal	Area of transversetemporal in the left hemisphere generated by parcellation of the pial surface using Desikan-Killiany parcellation
GCST90003797	0.0317853	0.718992	-0.171349	0.414304	0.154049	0.316693	0.0738343	0.349123	-0.0451913	0.717453	-0.255541	0.017875	0.25924	0.157669	0.0897077	0.669039	0.118331	0.77596	0.0397689	0.85563	0.380971	0.284166	0.0557853	0.421952	0.0464203	0.536154	-0.117027	0.216644	wg_lh_intensity-contrast_entorhinal	Grey-white contrast in entorhinal in the left hemisphere calculated as a percentage of the mean gray-white matter intensity from Desikan-Killiany parcellation
GCST90004540	0.0111273	0.883843	0.026776	0.727377	-0.00239059	0.978749	0.106697	0.00638834	0.0869749	0.348133	-0.00457832	0.943907	-0.025706	0.820303	0.00870701	0.921132	-0.117138	0.385764	0.0189949	0.859016	-0.14363	0.317121	0.0641248	0.0181683	0.0724964	0.014952	-0.0110907	0.804154	IDP_dMRI_ProbtrackX_ISOVF_ilf_r	Weighted-mean ISOVF (isotropic or free water volume fraction) in tract right inferior longitudinal fasciculus (from dMRI data)
GCST90004320	-0.0361429	0.566913	0.0483791	0.608595	-0.0909602	0.25597	-0.115609	0.0389622	-0.188331	0.131986	0.160244	0.133229	0.0898119	0.618414	-0.0222753	0.940514	0.0803751	0.852618	0.0329946	0.861295	0.178792	0.60526	-0.0714314	0.150638	-0.0886604	0.180476	0.0488445	0.542294	IDP_dMRI_ProbtrackX_L3_ptr_r	Weighted-mean L3 in tract right posterior thalamic radiation (from dMRI data)
Mean_superiorfrontal_thickavg_20200522_noGC	0.563926	0.504051	0.0634807	0.960544	0.815807	0.355824	-0.167917	0.740993	0.38249	0.717354	-1.47569	0.181091	0.222732	0.884901	-0.918381	0.402684	-4.77122	0.00543664	-0.237238	0.861446	-4.11789	0.05431	-0.340302	0.374163	0.0996675	0.852485	-1.36815	0.195606	NA	NA
GCST90003024	-0.0593834	0.561295	-0.0921963	0.393552	-0.0516932	0.616163	0.0594811	0.291435	0.284822	0.0245982	0.217393	0.356202	-0.192639	0.290019	0.0342517	0.725275	-0.0110603	0.942116	-0.0212138	0.861513	-0.137297	0.489773	0.0692369	0.105836	0.0913277	0.140366	0.165383	0.201412	aparc-a2009s_rh_volume_G-pariet-inf-Supramar	Volume of G-pariet-inf-Supramar in the right hemisphere generated by parcellation of the white surface using Destrieux (a2009s) parcellation
GCST90003869	0.0646991	0.0359863	0.108268	0.0265571	0.0279474	0.467831	-0.0351729	0.178221	-0.0652594	0.175274	-0.0217057	0.60384	0.00306315	0.965417	-0.0655527	0.174944	-0.116791	0.0523519	-0.0102635	0.861715	-0.0852019	0.342794	-0.0267627	0.248608	-0.0313232	0.312579	-0.0287509	0.42456	IDP_SWI_T2star_left_pallidum	Median T2star in left pallidum (from SWI data)
GCST90003826	0.0534497	0.143657	0.0209445	0.701782	0.0773601	0.110206	0.0253174	0.475734	0.0144837	0.816859	-0.0575907	0.316482	0.0946907	0.349957	-0.151483	0.050247	-0.27835	0.0136096	-0.0185836	0.863653	-0.282112	0.0926973	0.0104568	0.749807	0.0340872	0.304623	-0.00655736	0.901023	wg_lh_intensity-contrast_insula	Grey-white contrast in insula in the left hemisphere calculated as a percentage of the mean gray-white matter intensity from Desikan-Killiany parcellation
GCST90002553	-0.052138	0.87794	-0.267888	0.133789	0.133748	0.768938	-0.0473942	0.91721	-0.277417	0.612529	-0.0833755	0.610802	-0.205787	0.719049	0.147301	0.516974	0.638313	0.0488323	0.0434109	0.864766	0.689904	0.0916778	-0.18834	0.605399	-0.199737	0.574772	-0.171563	0.583297	IDP_T1_FAST_ROIs_L_pallidum	Volume of grey matter in Left Pallidum
Mean_supramarginal_surfavg_20190429_noGC	2.1124e-05	0.902193	-8.40335e-05	0.609628	9.2299e-05	0.638516	-5.28958e-05	0.730375	0.000425054	0.092113	-3.67875e-05	0.861521	5.73518e-05	0.859216	-0.000174424	0.370326	-0.000593024	0.0476073	3.94985e-05	0.866625	-0.000966146	0.00883269	3.69816e-05	0.7916	-1.04317e-05	0.948681	7.91737e-05	0.710813	NA	NA
GCST90004426	0.00596858	0.950175	0.0594735	0.677634	-0.0476668	0.689357	0.0348183	0.603118	-0.208573	0.266046	-0.298506	0.0188751	-0.0198074	0.925981	-0.0217553	0.906603	-0.091242	0.716422	-0.0326587	0.86665	-0.0401533	0.898639	-0.0647934	0.201009	-0.0173083	0.810486	-0.238465	0.0287148	IDP_dMRI_TBSS_OD_Superior_corona_radiata_R	Mean OD (orientation dispersion index) in superior corona radiata (right) on FA (fractional anisotropy) skeleton (from dMRI data)
GCST90004229	-0.0242471	0.844212	0.0687361	0.659488	-0.0807949	0.457035	-0.14417	0.0195884	0.139381	0.47918	0.438153	0.000191458	0.0796159	0.688317	-0.0965738	0.571652	-0.140238	0.51522	-0.0424554	0.869407	0.0135562	0.959985	-0.0253116	0.588848	-0.0471298	0.416712	0.172712	0.0494697	IDP_dMRI_ProbtrackX_MD_fma	Weighted-mean MD (mean diffusivity) in tract forceps major (from dMRI data)
GCST90003189	0.330886	0.0022469	0.226725	0.162027	0.386835	0.00493724	0.21474	0.00271998	0.27977	0.0779516	0.0399814	0.770786	0.301178	0.193604	0.148873	0.461022	-0.0861241	0.805228	0.0330315	0.869812	-0.0340589	0.948009	0.15551	0.00446789	0.213331	0.00153013	0.13199	0.277277	aparc-pial_rh_area_parahippocampal	Area of parahippocampal in the right hemisphere generated by parcellation of the pial surface using Desikan-Killiany parcellation
GCST90004460	-0.102589	0.238481	-0.162201	0.213024	-0.0582566	0.591605	0.0852243	0.49146	0.125484	0.438676	0.326499	0.187963	-0.205154	0.386402	-0.100674	0.569657	-0.653553	0.0195846	-0.0357279	0.869954	-0.84009	0.0393648	0.0672688	0.329348	0.076929	0.409611	0.185379	0.0751442	IDP_dMRI_ProbtrackX_OD_fma	Weighted-mean OD (orientation dispersion index) in tract forceps major (from dMRI data)
GCST90002431	-0.0112784	0.906904	0.036242	0.649369	0.0370735	0.60863	0.0141165	0.901385	-0.159307	0.36297	-0.0741635	0.720646	-0.0966016	0.631443	0.00693057	0.905995	-0.0396336	0.606261	0.0105029	0.873354	-0.0662843	0.485212	-0.0566618	0.444416	-0.044685	0.573939	-0.274675	0.0437024	IDP_T1_SIENAX_grey_unnormalised_volume	Volume of grey matter (from T1 brain image)
GCST90004107	-0.0116527	0.867564	0.0457498	0.598603	-0.0560154	0.562967	-0.0672724	0.350348	-0.158145	0.300917	0.205977	0.021579	-0.187714	0.434435	-0.0702817	0.490584	-0.114649	0.473033	0.0235004	0.874602	0.132531	0.509328	-0.053661	0.443005	-0.0927835	0.1998	0.0519079	0.632205	IDP_dMRI_TBSS_L1_External_capsule_R	Mean L1 in external capsule (right) on FA (fractional anisotropy) skeleton (from dMRI data)
GCST90003295	-0.237163	0.0383768	-0.336509	0.0498976	-0.218621	0.334314	-0.0499885	0.558352	-0.257528	0.487359	-0.228385	0.163712	-0.251395	0.35646	-0.163356	0.439305	-0.598187	0.276918	-0.0408611	0.874985	-0.488556	0.330482	-0.0929269	0.15181	-0.0653038	0.509059	-0.175733	0.150834	aparc-DKTatlas_rh_area_transversetemporal	Area of transversetemporal in the right hemisphere generated by parcellation of the white surface using DKT parcellation
Mean_insula_thickavg_20200522_noGC	1.34499	0.132106	0.316144	0.733232	2.04932	0.0313888	0.477508	0.43734	-0.991001	0.416239	-0.924297	0.370833	-0.425052	0.766851	0.659152	0.540189	-0.313061	0.888868	0.207326	0.876349	-1.64779	0.434397	-0.0139323	0.981726	0.13485	0.848229	-1.18531	0.0620314	NA	NA
GCST90004277	-0.0462441	0.499128	0.0407356	0.629924	-0.103213	0.280217	-0.223329	0.00209754	-0.235426	0.0510307	0.00881828	0.928086	-0.108332	0.491531	0.0496127	0.677296	0.190475	0.332694	0.0193435	0.877188	0.170964	0.386411	-0.171539	0.0102232	-0.180998	0.00964223	-0.0956178	0.363424	IDP_dMRI_ProbtrackX_L2_cgc_l	Weighted-mean L2 in tract left cingulate gyrus part of cingulum (from dMRI data)
GCST90003434	-0.155813	0.182274	0.0569516	0.808201	-0.276282	0.236474	-0.0258655	0.894218	-0.0392012	0.940636	0.188249	0.629336	0.415359	0.149575	-0.355944	0.325491	-0.997764	0.00407403	-0.0955363	0.878074	-0.985529	0.0230949	0.0946593	0.760046	0.100187	0.759339	0.231053	0.507273	aparc-a2009s_rh_area_S-orbital-H-Shaped	Area of S-orbital-H-Shaped in the right hemisphere generated by parcellation of the white surface using Destrieux (a2009s) parcellation
GCST90003831	0.0269406	0.59144	-0.0552493	0.40285	0.0770413	0.261484	0.14556	0.00353852	0.0375634	0.668293	0.0214952	0.827765	0.0448323	0.712207	-0.0109785	0.897238	-0.0586218	0.684386	-0.0162004	0.878213	-0.0793016	0.635616	0.092913	0.0561158	0.100417	0.0529722	0.10015	0.144203	wg_rh_intensity-contrast_cuneus	Grey-white contrast in cuneus in the right hemisphere calculated as a percentage of the mean gray-white matter intensity from Desikan-Killiany parcellation
GCST90003324	0.170862	0.0404909	0.211494	0.090411	0.148981	0.152208	0.00259104	0.971238	0.0209154	0.963512	0.229654	0.443773	0.279161	0.224396	0.00375533	0.97662	-0.0939269	0.643378	0.0240172	0.880435	-0.204471	0.55826	0.0369803	0.749088	0.0287167	0.779822	0.107771	0.68539	aparc-a2009s_lh_area_G-postcentral	Area of G-postcentral in the left hemisphere generated by parcellation of the white surface using Destrieux (a2009s) parcellation
GCST90003961	0.0189627	0.87181	-0.10064	0.566874	0.0866293	0.55452	-0.0402071	0.63832	-0.386157	0.0422397	-0.0815024	0.619692	-0.306105	0.365604	-0.050098	0.865795	-0.288807	0.430265	0.0785634	0.881845	-0.389081	0.399292	-0.032843	0.628119	-0.11074	0.262835	-0.0932316	0.591618	IDP_dMRI_TBSS_MO_Medial_lemniscus_L	Mean MO (diffusion tensor mode) in medial lemniscus (left) on FA (fractional anisotropy) skeleton (from dMRI data)
GCST90003105	0.210099	0.139045	0.168608	0.427455	0.223005	0.208416	0.162785	0.461358	0.584572	0.00364898	0.285959	0.0931597	0.636669	0.0250644	-0.0736488	0.732923	-0.261378	0.446023	-0.0394892	0.883051	-0.295133	0.637808	0.265323	0.146621	0.203236	0.301778	0.392635	0.00219326	aparc-Desikan_lh_area_transversetemporal	Area of transversetemporal in the left hemisphere generated by parcellation of the white surface using Desikan-Killiany parcellation
GCST90004549	0.213804	0.0243228	0.247161	0.0212569	0.200789	0.0873939	0.0404969	0.686168	0.160381	0.201843	0.0683553	0.599992	-0.356587	0.0530001	0.0720288	0.79211	0.249368	0.316194	-0.0546927	0.883469	0.305368	0.278715	0.0441468	0.553008	0.0220054	0.811903	-0.186695	0.0231838	IDP_dMRI_ProbtrackX_ISOVF_str_r	Weighted-mean ISOVF (isotropic or free water volume fraction) in tract right superior thalamic radiation (from dMRI data)
GCST90003264	0.206144	0.13934	0.16538	0.427949	0.218872	0.208623	0.159484	0.462761	0.573898	0.00371953	0.281017	0.0929696	0.62509	0.0251091	-0.0722555	0.733448	-0.256633	0.446586	-0.0385795	0.883771	-0.289307	0.638974	0.260249	0.147696	0.19926	0.30307	0.385518	0.00219965	aparc-DKTatlas_lh_area_transversetemporal	Area of transversetemporal in the left hemisphere generated by parcellation of the white surface using DKT parcellation
GCST90003856	-0.0175247	0.682471	-0.149628	0.0279853	0.0390452	0.434413	-0.00466243	0.908053	-0.146191	0.0907546	-0.0713075	0.224903	-0.057486	0.555797	-0.0346807	0.57023	-0.0839696	0.411805	0.0130217	0.88407	-0.038806	0.737233	-0.0322303	0.439132	0.014574	0.666518	-0.0519914	0.310054	wg_rh_intensity-contrast_superiortemporal	Grey-white contrast in superiortemporal in the right hemisphere calculated as a percentage of the mean gray-white matter intensity from Desikan-Killiany parcellation
GCST90004181	-0.00939394	0.935273	0.102968	0.302627	-0.0745503	0.547135	-0.0851086	0.133494	-0.14978	0.238144	0.323282	0.00368285	0.102227	0.575754	0.0638038	0.797173	-0.399661	0.314519	0.0417943	0.887495	-0.457638	0.363008	-0.0145969	0.795804	-0.0302189	0.665186	0.176702	0.158875	IDP_dMRI_TBSS_L3_Inferior_cerebellar_peduncle_R	Mean L3 in inferior cerebellar peduncle (right) on FA (fractional anisotropy) skeleton (from dMRI data)
GCST90004256	-0.10089	0.34272	-0.0661225	0.677421	-0.144969	0.275033	-0.240528	0.00600199	0.163185	0.611981	-0.0346443	0.878708	-0.264103	0.349663	-0.222547	0.612614	-0.208891	0.509238	-0.0815721	0.88782	-0.442268	0.274012	-0.0912093	0.350078	-0.0488267	0.637094	0.0473896	0.867106	IDP_dMRI_ProbtrackX_L1_fma	Weighted-mean L1 in tract forceps major (from dMRI data)
GCST90004174	-0.0188694	0.822117	0.220663	0.0606807	-0.167316	0.0838768	-0.229414	0.0162748	-0.143821	0.426887	-0.141542	0.339885	0.0154537	0.94537	0.116593	0.599813	0.205898	0.397013	0.0280927	0.88797	0.215248	0.465284	-0.163231	0.112322	-0.162652	0.10467	-0.0426687	0.74502	IDP_dMRI_TBSS_L3_Body_of_corpus_callosum	Mean L3 in body of corpus callosum on FA (fractional anisotropy) skeleton (from dMRI data)
Mean_inferiorparietal_thickavg_20200522_noGC	-0.994714	0.289559	1.13524	0.399137	-2.15743	0.0242131	-2.43742	0.0204011	-2.15523	0.283924	-0.17806	0.876203	-5.71957	0.00295384	-0.628707	0.845342	-0.818805	0.875492	-0.44406	0.888154	-1.71618	0.804108	-2.23929	0.0548819	-2.2123	0.0916864	-1.90443	0.119239	NA	NA
GCST90003880	0.00203733	0.976361	-0.0949111	0.356364	0.0544935	0.525626	0.265402	0.0133013	0.199292	0.170412	0.217982	0.0834234	0.0418764	0.8074	0.0276215	0.867711	-0.133847	0.516671	0.022534	0.891355	-0.202156	0.413823	0.195727	0.0174275	0.195413	0.0711857	0.125876	0.228314	IDP_dMRI_TBSS_FA_Body_of_corpus_callosum	Mean FA (fractional anisotropy) in body of corpus callosum on FA skeleton (from dMRI data)
GCST90002668	-0.00725377	0.890753	0.0440396	0.577058	-0.0351311	0.709399	0.00905353	0.829574	0.0639823	0.526154	0.0265764	0.771668	0.101719	0.445906	0.140616	0.229102	0.423909	0.0442559	0.0180937	0.891898	0.248946	0.41866	0.0210001	0.574661	0.0285894	0.588206	0.0235595	0.820661	HippSubfield_lh_volume_Hippocampal-tail	Volume of Hippocampal-tail in the left hemisphere generated by subcortical volumetric sub-segmentation of the Hippocampal Subfields
GCST90004548	0.0982258	0.20357	0.181376	0.11662	0.0420301	0.662935	0.0899495	0.274884	0.181871	0.179522	0.000436017	0.997936	-0.348704	0.0792663	0.0874458	0.729599	0.411709	0.188819	-0.0487494	0.89454	0.39358	0.354986	0.0362979	0.47151	0.0370108	0.554912	-0.188776	0.0324996	IDP_dMRI_ProbtrackX_ISOVF_str_l	Weighted-mean ISOVF (isotropic or free water volume fraction) in tract left superior thalamic radiation (from dMRI data)
GCST90004370	0.0160074	0.875625	-0.0997169	0.447771	0.0887026	0.279143	0.15883	0.0238161	0.244789	0.0730482	-0.00697581	0.940773	0.0973909	0.550689	0.0928347	0.609357	-0.0672359	0.763649	0.0303607	0.894586	-0.110088	0.731029	0.152464	0.0349337	0.170155	0.0100677	0.0621236	0.475078	IDP_dMRI_TBSS_ICVF_Superior_fronto-occipital_fasciculus_L	Mean ICVF (intra-cellular volume fraction) in superior fronto-occipital fasciculus (left) on FA (fractional anisotropy) skeleton (from dMRI data)
GCST90003145	0.093288	0.0382548	0.196099	0.00177277	0.0293696	0.574359	0.0235237	0.519466	0.00140017	0.986132	-0.0920119	0.170291	-0.0965633	0.486367	0.00206409	0.980197	-0.0536643	0.680585	0.0135783	0.894991	0.0292905	0.85763	-0.0123262	0.723562	-0.0098691	0.853576	-0.0771682	0.142448	aparc-pial_lh_area_cuneus	Area of cuneus in the left hemisphere generated by parcellation of the pial surface using Desikan-Killiany parcellation
Mean_middletemporal_thickavg_20200522_noGC	0	1	0	1	0	1	-1.57634	0.275191	-0.727941	0.832709	-2.01561	0.0709312	-5.53201	0.00327356	0.597625	0.764511	1.69754	0.533789	0.314573	0.896725	6.26788	0.066929	-1.87932	0.155065	-1.63261	0.280085	-3.69772	9.54176e-06	NA	NA
GCST90003437	-0.0222185	0.876828	-0.108345	0.531206	0.0287799	0.838171	0.0470601	0.478173	0.365595	0.0450669	0.367732	0.00428737	-0.110242	0.606174	-0.0443993	0.699827	-0.159973	0.375958	0.0183822	0.898332	-0.370231	0.0989658	0.100269	0.0563221	0.0737454	0.236234	0.219886	0.193014	aparc-a2009s_rh_area_S-postcentral	Area of S-postcentral in the right hemisphere generated by parcellation of the white surface using Destrieux (a2009s) parcellation
GCST90004343	-0.0171208	0.73311	-0.0580813	0.3986	0.0111456	0.85175	0.0716769	0.0283372	0.205601	0.00388822	-0.0515798	0.384658	0.0331048	0.721499	0.00118087	0.989617	-0.0855457	0.476691	0.011241	0.904104	-0.181346	0.2434	0.068832	0.0267857	0.0815558	0.0163233	0.0426451	0.30312	IDP_dMRI_TBSS_ICVF_Anterior_limb_of_internal_capsule_R	Mean ICVF (intra-cellular volume fraction) in anterior limb of internal capsule (right) on FA (fractional anisotropy) skeleton (from dMRI data)
GCST90004369	0.0468606	0.600981	-0.0377761	0.783479	0.103578	0.225595	0.115942	0.196578	0.302943	0.00322237	-0.0505391	0.567095	0.105037	0.539151	0.0287567	0.872779	-0.0993147	0.642628	0.0179948	0.90489	-0.12141	0.610508	0.13857	0.0726423	0.168652	0.00955774	0.0724692	0.396879	IDP_dMRI_TBSS_ICVF_Superior_fronto-occipital_fasciculus_R	Mean ICVF (intra-cellular volume fraction) in superior fronto-occipital fasciculus (right) on FA (fractional anisotropy) skeleton (from dMRI data)
GCST90004210	-0.147037	0.154899	-0.00637092	0.967137	-0.239917	0.0628795	-0.141351	0.378637	-0.373151	0.0319129	0.0340596	0.86741	0.0313466	0.920276	-0.0387509	0.809473	0.0163748	0.948418	0.0237616	0.905424	0.0331736	0.91665	-0.134884	0.424795	-0.171687	0.359248	-0.070024	0.6053	IDP_dMRI_TBSS_L3_Fornix_cres+Stria_terminalis_L	Mean L3 in fornix cres+stria terminalis (left) on FA (fractional anisotropy) skeleton (from dMRI data)
GCST90002857	-0.161903	0.0288008	-0.176784	0.111026	-0.153267	0.0971482	0.00641226	0.919612	-0.044088	0.877128	-0.280299	0.119031	-0.213146	0.295999	0.0268176	0.811845	0.0765731	0.663657	0.0166756	0.905513	0.205653	0.352326	-0.0530902	0.489541	-0.0325165	0.606775	-0.161323	0.330766	BA-exvivo_rh_volume_BA45	Volume of BA45 in the right hemisphere generated by parcellation of the white surface using BA_exvivo parcellation
GCST90004324	-0.0246659	0.860964	0.0638991	0.641703	-0.0637988	0.683812	-0.0317886	0.804645	-0.367712	0.00290411	0.00964252	0.951771	-0.108213	0.759463	0.127765	0.567262	0.370588	0.124584	-0.0275919	0.905864	0.400827	0.184632	-0.103712	0.362246	-0.117586	0.270201	-0.0653467	0.637449	IDP_dMRI_ProbtrackX_L3_str_r	Weighted-mean L3 in tract right superior thalamic radiation (from dMRI data)
GCST90003322	0.0478876	0.79534	-0.0569809	0.758262	0.0967487	0.606813	0.171996	0.08662	0.585556	0.000143818	0.330607	0.0272008	0.0929287	0.710765	0.0293322	0.845299	-0.196006	0.41009	-0.0217399	0.907351	-0.649858	0.028806	0.248427	0.00586346	0.220064	0.0130088	0.331958	0.000705463	aparc-a2009s_lh_area_G-pariet-inf-Supramar	Area of G-pariet-inf-Supramar in the left hemisphere generated by parcellation of the white surface using Destrieux (a2009s) parcellation
GCST90002820	-0.15739	0.0315722	-0.173315	0.114023	-0.14761	0.106096	0.0102129	0.869786	-0.0278062	0.921088	-0.267954	0.139611	-0.209867	0.294188	0.0289869	0.792944	0.0686177	0.690921	0.015782	0.90877	0.190202	0.391796	-0.04987	0.512135	-0.0279651	0.656358	-0.153409	0.352322	aparc-Desikan_rh_volume_parstriangularis	Volume of parstriangularis in the right hemisphere generated by parcellation of the white surface using Desikan-Killiany parcellation
GCST90003227	-0.225744	0.358872	-0.298746	0.248725	-0.195692	0.416298	-0.143889	0.362467	0.510387	0.000528599	-0.0882028	0.652754	0.0660548	0.834842	-0.106561	0.641313	-0.315743	0.364006	-0.0264698	0.908912	-0.242282	0.639799	-0.0146013	0.894469	0.0464199	0.689724	0.0210589	0.900024	BA-exvivo_rh_area_BA6	Area of BA6 in the right hemisphere generated by parcellation of the white surface using BA_exvivo parcellation
GCST90003336	-0.275074	0.0119474	-0.308194	0.142483	-0.271894	0.04646	-0.00802169	0.936578	-0.0940338	0.907728	-0.125131	0.753364	-0.0662113	0.838458	-0.103863	0.540014	0.0346922	0.895981	0.0241748	0.909077	0.0146665	0.974871	-0.00346053	0.982918	-0.0112433	0.938188	-0.00677604	0.986776	aparc-a2009s_lh_area_Lat-Fis-ant-Vertical	Area of Lat-Fis-ant-Vertical in the left hemisphere generated by parcellation of the white surface using Destrieux (a2009s) parcellation
GCST90004033	0.14313	0.536983	0.226775	0.276579	0.100824	0.689403	-0.0941602	0.202443	0.025701	0.927769	-0.0111707	0.946757	0.0283218	0.905288	-0.151367	0.504231	-0.571382	0.106368	-0.0402326	0.911197	-1.08613	0.020889	-0.0473651	0.40401	-0.0949971	0.444475	0.0855743	0.418209	IDP_dMRI_TBSS_MD_Corticospinal_tract_R	Mean MD (mean diffusivity) in corticospinal tract (right) on FA (fractional anisotropy) skeleton (from dMRI data)
GCST90004286	-0.0117853	0.78679	-0.00381234	0.960634	-0.0179977	0.740829	-0.0939322	0.00900692	-0.154501	0.0541719	0.048339	0.482534	0.188242	0.103971	0.0446054	0.704597	0.166436	0.292968	0.0163179	0.912652	0.112045	0.612292	-0.0740087	0.00674339	-0.0962736	0.00431555	0.0160836	0.755192	IDP_dMRI_ProbtrackX_L2_ifo_r	Weighted-mean L2 in tract right inferior fronto-occipital fasciculus (from dMRI data)
GCST90003454	-0.173188	0.238582	0.00246858	0.994144	-0.293332	0.10994	-0.104807	0.254374	-0.59319	0.00306147	-0.111767	0.528467	-0.0168287	0.954543	0.126977	0.59401	0.625027	0.193515	-0.0322556	0.91272	1.03466	0.0288229	-0.167195	0.0174464	-0.156111	0.0728116	-0.128902	0.329534	aparc-Desikan_lh_thickness_isthmuscingulate	Mean thickness of isthmuscingulate in the left hemisphere generated by parcellation of the white surface using Desikan-Killiany parcellation
GCST90003950	0.0276429	0.684347	0.00650148	0.946392	0.0513527	0.628881	0.179287	0.000842533	0.0329568	0.782697	-0.0649181	0.599472	0.171924	0.536821	0.0789658	0.743595	0.171146	0.376153	0.0263222	0.913981	0.212238	0.494738	0.133195	0.00575491	0.135286	0.0231847	0.0992159	0.402618	IDP_dMRI_ProbtrackX_FA_unc_l	Weighted-mean FA (fractional anisotropy) in tract left uncinate fasciculus (from dMRI data)
GCST90003413	-0.000892508	0.993827	-0.0413806	0.810807	0.0323833	0.82206	0.163963	0.17296	0.0619986	0.897434	0.283822	0.311093	0.422763	0.177434	0.0499362	0.839336	0.452221	0.38084	0.0327494	0.914201	0.656271	0.176879	0.151424	0.038422	0.184673	0.0401975	0.262741	0.0572406	aparc-a2009s_rh_area_Pole-temporal	Area of Pole-temporal in the right hemisphere generated by parcellation of the white surface using Destrieux (a2009s) parcellation
GCST90003111	0.0186289	0.752962	0.0400613	0.60728	0.00134471	0.981884	0.0405361	0.504972	0.18339	0.0328836	0.0270807	0.785327	0.0541332	0.727325	-0.0238667	0.813267	-0.0331562	0.83779	0.0147429	0.916018	0.050656	0.758777	0.0683338	0.214503	0.00662456	0.902633	-0.0302636	0.681516	aparc-Desikan_rh_area_cuneus	Area of cuneus in the right hemisphere generated by parcellation of the white surface using Desikan-Killiany parcellation
GCST90004287	-0.0916854	0.0648591	-0.0247209	0.766914	-0.134336	0.0303865	-0.0736754	0.065151	-0.0973791	0.340895	0.127573	0.0945465	0.0348264	0.851417	0.0776834	0.589593	0.160439	0.358492	-0.015864	0.91656	0.159253	0.450293	-0.0665738	0.0279999	-0.087956	0.0241745	-0.00663081	0.922385	IDP_dMRI_ProbtrackX_L2_ilf_l	Weighted-mean L2 in tract left inferior longitudinal fasciculus (from dMRI data)
GCST90003548	-0.17468	0.12564	-0.0690503	0.722001	-0.243333	0.0874429	-0.071323	0.365158	-0.474685	0.00584083	-0.164874	0.26984	-0.0164184	0.948287	0.210901	0.210676	0.559562	0.0342494	0.0209549	0.920188	0.734006	0.0273252	-0.133489	0.0263664	-0.0515541	0.664886	-0.158061	0.161163	aparc-DKTatlas_lh_thickness_isthmuscingulate	Mean thickness of isthmuscingulate in the left hemisphere generated by parcellation of the white surface using DKT parcellation
Mean_superiorfrontal_surfavg_20190429_noGC	0.000247192	0.00995931	0.000246704	0.0324532	0.000255303	0.0347154	5.39001e-06	0.959532	7.39974e-05	0.754022	-0.000191176	0.185932	0.000119323	0.687187	-9.20218e-05	0.652419	-0.000129518	0.646343	-2.2245e-05	0.921647	-1.15263e-05	0.973722	8.76334e-06	0.930385	-1.86889e-05	0.869663	-5.40504e-05	0.662478	NA	NA
GCST90003283	-0.148781	0.035868	-0.159384	0.133378	-0.140372	0.112561	0.00424679	0.944248	-0.0664303	0.805842	-0.277886	0.091117	-0.21534	0.269211	0.0146752	0.893205	0.0344967	0.840233	0.0130256	0.923985	0.146991	0.587787	-0.0614339	0.366638	-0.0332322	0.588867	-0.160937	0.314306	aparc-DKTatlas_rh_area_parstriangularis	Area of parstriangularis in the right hemisphere generated by parcellation of the white surface using DKT parcellation
GCST90002762	0.296985	0.159561	0.220294	0.398219	0.368684	0.0448642	0.0132289	0.858575	-0.495489	0.00283478	0.00205223	0.988496	-0.0834312	0.727668	-0.0523372	0.823298	-0.358626	0.311441	-0.0261321	0.925369	-0.573012	0.476507	0.00430307	0.939276	-0.0768605	0.27201	0.079575	0.455266	ThalamNuclei_lh_volume_Whole-thalamus	Volume of Whole-thalamus in the left hemisphere generated by subcortical volumetric sub-segmentation of the Thalamic Nuclei
GCST90003879	-0.0191475	0.857835	-0.0956338	0.436457	0.0315349	0.800485	0.275826	0.00648222	0.152001	0.378921	0.0259283	0.801871	0.141993	0.539887	0.0738197	0.52774	0.19608	0.270373	-0.0172992	0.927906	0.338774	0.127483	0.165613	0.16803	0.145304	0.285639	0.0586807	0.645304	IDP_dMRI_TBSS_FA_Genu_of_corpus_callosum	Mean FA (fractional anisotropy) in genu of corpus callosum on FA skeleton (from dMRI data)
GCST90003656	0.00978717	0.950596	0.0624786	0.780367	-0.00590407	0.967515	-0.114643	0.13835	-0.0441457	0.867704	-0.152412	0.54898	0.221181	0.374327	-0.203752	0.315465	-0.320883	0.315909	0.0224462	0.928846	-0.449672	0.260949	-0.119665	0.0420161	-0.170366	0.0367126	-0.102054	0.610719	aparc-a2009s_lh_thickness_S-front-sup	Mean thickness of S-front-sup in the left hemisphere generated by parcellation of the white surface using Destrieux (a2009s) parcellation
GCST90003128	0.152759	0.0239145	0.171883	0.0898825	0.148721	0.0779615	0.00247917	0.966601	0.00975149	0.979405	0.184724	0.460786	0.235509	0.213373	0.00567352	0.956319	-0.0567468	0.726162	0.0115093	0.929069	-0.120678	0.698044	0.0294992	0.756478	0.0215202	0.801474	0.0829943	0.708969	aparc-Desikan_rh_area_postcentral	Area of postcentral in the right hemisphere generated by parcellation of the white surface using Desikan-Killiany parcellation
GCST90002522	0.112699	0.298685	-0.000391604	0.997753	0.181787	0.131132	0.0613278	0.401247	0.373109	0.00450779	0.157278	0.167944	0.094372	0.621997	-0.0364792	0.835381	-0.147523	0.675585	-0.0144464	0.929087	0.0745892	0.801768	0.0892218	0.082183	0.0731372	0.382905	0.120305	0.156842	IDP_T1_FAST_ROIs_R_lingual_gyrus	Volume of grey matter in Right Lingual Gyrus
GCST90003381	0.0535137	0.328693	0.0329453	0.592076	0.0645308	0.299409	0.0475762	0.427477	0.154681	0.0392057	0.0819928	0.275888	0.0593611	0.664242	-0.00251615	0.972486	0.00321809	0.977663	0.00977843	0.929651	0.0332785	0.814042	0.0754516	0.142382	0.00627682	0.895778	-0.0239672	0.685628	aparc-a2009s_rh_area_G-cuneus	Area of G-cuneus in the right hemisphere generated by parcellation of the white surface using Destrieux (a2009s) parcellation
GCST90003598	0.171328	0.237913	0.255729	0.333374	0.0991793	0.76414	-0.0629591	0.472491	-0.349803	0.0681623	-0.0999913	0.54765	0.425939	0.12727	0.154489	0.632013	0.645536	0.376837	0.0325444	0.93195	1.30266	0.0322039	-0.0382914	0.59921	-0.0924258	0.266763	0.229366	0.0683683	aparc-DKTatlas_rh_thickness_superiorparietal	Mean thickness of superiorparietal in the right hemisphere generated by parcellation of the white surface using DKT parcellation
GCST90004227	0	1	0	1	0	1	-0.242422	0.0259629	-0.257505	0.154887	0.185743	0.268625	-0.16052	0.702426	-0.200514	0.223634	-0.166302	0.520747	-0.0169243	0.933717	-0.109491	0.734688	-0.19436	0.195884	-0.209981	0.0772029	-0.0369202	0.811825	IDP_dMRI_ProbtrackX_MD_cst_l	Weighted-mean MD (mean diffusivity) in tract left corticospinal tract (from dMRI data)
Mean_temporalpole_thickavg_20200522_noGC	1.11659	0.38731	0.803464	0.314321	1.27029	0.421548	1.04499	0.214162	-1.23941	0.58291	-0.841716	0.330939	-1.31241	0.365177	0.39925	0.829429	-0.926829	0.59154	0.184564	0.936102	-2.16366	0.316546	0.572283	0.596256	0.930762	0.19734	-1.51169	0.0191393	NA	NA
GCST90003508	-0.270923	0.00609806	-0.263846	0.0745087	-0.254001	0.0395307	-0.111426	0.497764	-0.419138	0.026383	0.0366902	0.837529	0.231891	0.582036	0.169132	0.400859	0.484053	0.126977	-0.01992	0.9363	0.254646	0.522578	-0.0632885	0.666723	-0.0467773	0.772581	0.0703048	0.698076	aparc-Desikan_rh_thickness_superiortemporal	Mean thickness of superiortemporal in the right hemisphere generated by parcellation of the white surface using Desikan-Killiany parcellation
GCST90002911	-0.162919	0.033603	-0.176432	0.124473	-0.153469	0.108662	0.00634468	0.923012	-0.056901	0.846627	-0.290798	0.11732	-0.240347	0.253788	0.0132501	0.910628	0.0334557	0.856304	0.0114363	0.938161	0.142932	0.630117	-0.0623792	0.40735	-0.0325337	0.628779	-0.164369	0.354102	aparc-DKTatlas_rh_volume_parstriangularis	Volume of parstriangularis in the right hemisphere generated by parcellation of the white surface using DKT parcellation
GCST90003714	-0.192443	0.28028	-0.0985623	0.665705	-0.232417	0.0877648	-0.168666	0.0636783	0.0372645	0.935255	-0.166533	0.282311	-0.616802	0.0179745	-0.157705	0.408631	-0.706249	0.0194934	0.0192718	0.939642	-0.839968	0.0266581	-0.170748	0.169957	-0.168557	0.262206	-0.414375	0.000328585	aparc-a2009s_rh_thickness_G-temporal-middle	Mean thickness of G-temporal-middle in the right hemisphere generated by parcellation of the white surface using Destrieux (a2009s) parcellation
GCST90003895	-0.0443697	0.473411	-0.00411316	0.956684	-0.0722487	0.355608	0.0499849	0.540037	0.098496	0.342407	-0.0088034	0.910446	-0.00425157	0.974505	0.0258317	0.777329	0.295021	0.0376197	0.00985935	0.939712	0.36724	0.0391287	0.0172298	0.756072	0.0193475	0.742251	-0.0482326	0.437511	IDP_dMRI_TBSS_FA_Posterior_limb_of_internal_capsule_R	Mean FA (fractional anisotropy) in posterior limb of internal capsule (right) on FA skeleton (from dMRI data)
GCST90004064	-0.0660467	0.359478	-0.0089335	0.937542	-0.103356	0.089739	-0.0940923	0.0232946	-0.185202	0.0632587	0.13057	0.132519	0.116179	0.383181	0.033232	0.837008	0.094601	0.741683	0.0101515	0.939808	0.00283019	0.99306	-0.0501021	0.167863	-0.0917675	0.0257806	0.000210328	0.9975	IDP_dMRI_TBSS_MD_Cingulum_hippocampus_L	Mean MD (mean diffusivity) in cingulum hippocampus (left) on FA (fractional anisotropy) skeleton (from dMRI data)
GCST90004023	-0.0731714	0.371038	-0.079834	0.466144	-0.1909	0.121734	0.0571263	0.315551	0.0087063	0.95102	0.184231	0.104898	0.225922	0.0831926	-0.000847521	0.992359	0.00677006	0.961163	-0.00922983	0.94106	0.0391675	0.822172	-0.0068123	0.931314	0.0434483	0.305641	0.135658	0.0299908	IDP_dMRI_ProbtrackX_MO_str_l	Weighted-mean MO (diffusion tensor mode) in tract left superior thalamic radiation (from dMRI data)
GCST90002846	0.262173	0.00806467	0.209927	0.156047	0.290065	0.0188933	0.0768864	0.513362	-0.00803647	0.962741	0.000921474	0.996501	0.184469	0.462104	0.0245555	0.874751	0.261869	0.282516	0.0142167	0.941652	0.114711	0.770768	0.0316014	0.666417	0.0834695	0.253043	-0.0626909	0.572796	BA-exvivo_lh_volume_MT	Volume of MT in the left hemisphere generated by parcellation of the white surface using BA_exvivo parcellation
GCST90003563	0.0190327	0.870779	0.187964	0.42491	-0.0954257	0.616566	-0.298853	0.00392585	-0.538554	0.00134958	-0.171267	0.19562	-0.331285	0.368315	-0.304185	0.242762	-0.463666	0.25438	-0.0221398	0.945073	-0.47707	0.40556	-0.313598	0.00396763	-0.223404	0.00403252	-0.0781957	0.511187	aparc-DKTatlas_lh_thickness_precuneus	Mean thickness of precuneus in the left hemisphere generated by parcellation of the white surface using DKT parcellation
GCST90003469	-0.122631	0.308026	-0.217772	0.525096	-0.0503525	0.697018	-0.277034	0.00220309	-0.44559	0.0233863	-0.192471	0.123395	-0.315116	0.296291	-0.30026	0.243435	-0.457509	0.255244	-0.0216644	0.94564	-0.474392	0.400584	-0.286284	0.00328758	-0.172583	0.022508	-0.0526534	0.632474	aparc-Desikan_lh_thickness_precuneus	Mean thickness of precuneus in the left hemisphere generated by parcellation of the white surface using Desikan-Killiany parcellation
GCST90003350	0.207926	0.42254	0.131382	0.488432	0.227485	0.50016	0.283188	0.335459	0.31777	0.432137	0.583936	0.0206946	0.244694	0.453123	0.157671	0.555273	0.757847	0.0729126	-0.022299	0.945813	0.901122	0.0903454	0.339405	0.0903255	0	1	0	1	aparc-a2009s_lh_area_S-front-sup	Area of S-front-sup in the left hemisphere generated by parcellation of the white surface using Destrieux (a2009s) parcellation
GCST90003857	-0.0283303	0.628896	-0.0840803	0.304501	-0.00437788	0.948902	0.0304238	0.478766	-0.16117	0.044359	-0.0235373	0.75149	-0.0547607	0.558479	-0.00528914	0.932117	-0.0871349	0.414991	0.00558026	0.947952	-0.00449453	0.97349	-0.021442	0.606698	-0.00660094	0.882578	-0.0494392	0.340836	wg_rh_intensity-contrast_supramarginal	Grey-white contrast in supramarginal in the right hemisphere calculated as a percentage of the mean gray-white matter intensity from Desikan-Killiany parcellation
GCST90003106	-0.210329	0.088221	-0.186358	0.280426	-0.133682	0.352529	-0.0509567	0.604813	0.0905347	0.719745	-0.573079	0.00221836	-0.568929	0.0693579	-0.0183138	0.835916	-0.069658	0.321398	-0.00840665	0.94914	-0.0440584	0.616112	-0.180906	0.0155807	0	1	0	1	aparc-Desikan_lh_area_insula	Area of insula in the left hemisphere generated by parcellation of the white surface using Desikan-Killiany parcellation
GCST90004245	-0.079363	0.0957875	0.00914162	0.897964	-0.135146	0.0231662	-0.040715	0.325472	0.0407139	0.749742	0.142634	0.0619788	-0.0791971	0.640959	0.0907753	0.436668	0.233334	0.222189	0.00948498	0.95088	0.213719	0.29406	-0.00517782	0.895746	-0.0468459	0.212627	0.00867467	0.890237	IDP_dMRI_ProbtrackX_MD_unc_r	Weighted-mean MD (mean diffusivity) in tract right uncinate fasciculus (from dMRI data)
GCST90002872	-0.151666	0.0621946	-0.181739	0.135031	-0.131802	0.224546	0.139466	0.0271698	0.124186	0.375148	0.310754	0.0102774	0.382067	0.0590347	-0.00963872	0.943006	0.0835553	0.694007	-0.0101543	0.951688	0.243482	0.36133	0.230504	7.83087e-06	0.195092	0.00926822	0.349677	0.000109169	aparc-DKTatlas_lh_volume_lateralorbitofrontal	Volume of lateralorbitofrontal in the left hemisphere generated by parcellation of the white surface using DKT parcellation
GCST90002458	-0.0915319	0.52475	0.0429737	0.77848	-0.198858	0.322287	-0.171759	0.183605	-0.286317	0.224778	-0.27793	0.0252095	0.30499	0.328002	-0.0203812	0.936339	0.179356	0.772084	0.0176576	0.952874	0.190297	0.80188	-0.143596	0.00399015	-0.124884	0.194168	-0.296882	0.00555041	IDP_T1_FAST_ROIs_R_mid_front_gyrus	Volume of grey matter in Right Middle Frontal Gyrus
GCST90004159	-0.0902557	0.160747	-0.0257376	0.783285	-0.125634	0.107792	-0.139559	0.00879328	-1.92419e-05	0.99988	0.061265	0.696044	-0.122443	0.490213	0.0093788	0.929858	-0.00584552	0.972198	-0.00727685	0.956474	-0.0282626	0.893422	-0.0945927	0.0582273	-0.11811	0.0176028	-0.0447156	0.733696	IDP_dMRI_TBSS_L2_Cingulum_hippocampus_R	Mean L2 in cingulum hippocampus (right) on FA (fractional anisotropy) skeleton (from dMRI data)
GCST90004278	-0.030842	0.579265	0.00501564	0.951983	-0.0519062	0.454937	-0.151925	0.047799	-0.11246	0.293266	0.145978	0.114985	0.00797597	0.959325	-0.0445648	0.652688	0.0310434	0.840642	-0.00647288	0.958253	0.0362956	0.850533	-0.0985339	0.0653517	-0.116879	0.0273637	0.0444987	0.536616	IDP_dMRI_ProbtrackX_L2_cgc_r	Weighted-mean L2 in tract right cingulate gyrus part of cingulum (from dMRI data)
GCST90003863	0.0115779	0.92244	0.102003	0.566419	-0.0543511	0.714459	0.0806214	0.51239	0.085156	0.777182	0.165947	0.311275	0.187736	0.492671	0	1	0	1	0.0139496	0.961329	0	1	0.126466	0.306501	0.0883279	0.617334	0.267825	0.0283579	IDP_SWI_T2star_left_thalamus	Median T2star in left thalamus (from SWI data)
GCST90003911	0.0155267	0.798252	0.0783191	0.474489	-0.0198065	0.847614	0.117733	0.0238777	0.0723249	0.529171	0.0806561	0.499429	0.147691	0.378404	0.0761887	0.581571	0.0251853	0.89027	0.00674942	0.965232	0.0883348	0.756908	0.0874676	0.0272434	0.112774	0.0220607	0.0795021	0.415195	IDP_dMRI_TBSS_FA_Cingulum_cingulate_gyrus_R	Mean FA (fractional anisotropy) in cingulum cingulate gyrus (right) on FA skeleton (from dMRI data)
GCST90003940	-0.0137499	0.868161	-0.0786284	0.272593	0.0281554	0.786346	0.134152	0.0495304	0.126999	0.157573	-0.0208497	0.838074	-0.0676691	0.601983	-0.136961	0.510739	-0.251155	0.399189	-0.00966172	0.968916	-0.178959	0.654239	0.0835706	0.0867807	0.0976163	0.0793566	-0.0546824	0.360862	IDP_dMRI_ProbtrackX_FA_ilf_r	Weighted-mean FA (fractional anisotropy) in tract right inferior longitudinal fasciculus (from dMRI data)
GCST90004238	-0.108931	0.235611	-0.0129954	0.900675	-0.162652	0.0643978	-0.12085	0.0359845	-0.159819	0.21219	0.0299205	0.846068	0.177717	0.338951	0.0524214	0.843498	0.112782	0.762679	0.00819863	0.969653	0.16968	0.630588	-0.0816744	0.0617808	-0.0975298	0.092431	0.0427021	0.604829	IDP_dMRI_ProbtrackX_MD_ptr_l	Weighted-mean MD (mean diffusivity) in tract left posterior thalamic radiation (from dMRI data)
GCST90004248	-0.069182	0.555089	0.0758818	0.580503	-0.169964	0.0875081	-0.124419	0.244486	-0.285344	0.0160193	0.0829704	0.396377	0.0828789	0.712625	0.021417	0.925356	0.047529	0.894745	-0.0071031	0.970029	-0.0334958	0.920679	-0.13108	0.168856	-0.161323	0.161475	-0.0180019	0.874551	IDP_dMRI_ProbtrackX_L1_atr_l	Weighted-mean L1 in tract left anterior thalamic radiation (from dMRI data)
GCST90004328	0.0674315	0.515671	0.329031	0.034199	-0.100906	0.435888	-0.0540891	0.798815	0.0484741	0.884577	0.0847135	0.53156	0.161179	0.569934	-0.139887	0.550808	-0.309677	0.183097	-0.010083	0.970212	-0.190361	0.510235	0.0225224	0.919678	-0.239275	0.181155	-0.134335	0.484505	IDP_dMRI_TBSS_ICVF_Pontine_crossing_tract	Mean ICVF (intra-cellular volume fraction) in pontine crossing tract on FA (fractional anisotropy) skeleton (from dMRI data)
GCST90004331	-0.0219686	0.615209	0.0160418	0.726459	-0.0510601	0.353371	0.0616287	0.0419689	0.0663427	0.391852	-0.00552319	0.914315	-0.0953679	0.268574	-0.0118398	0.845927	-0.0518981	0.609044	-0.00261754	0.970832	-0.0756737	0.554572	0.0189248	0.524265	0.0367024	0.222996	0.0153442	0.667743	IDP_dMRI_TBSS_ICVF_Splenium_of_corpus_callosum	Mean ICVF (intra-cellular volume fraction) in splenium of corpus callosum on FA (fractional anisotropy) skeleton (from dMRI data)
GCST90003272	0.124045	0.760386	0.169889	0.511091	0.0747214	0.868935	0.2836	0.204354	0.129003	0.867853	-0.111158	0.706621	0.515798	0.0754821	-0.136135	0.633597	-0.725419	0.0416143	-0.0121846	0.972931	-0.976544	0.0283678	0.264564	0.351365	0	1	0	1	aparc-DKTatlas_rh_area_inferiortemporal	Area of inferiortemporal in the right hemisphere generated by parcellation of the white surface using DKT parcellation
GCST90002988	-0.134563	0.308333	0.125185	0.728904	-0.291518	0.0818389	0.0734521	0.49787	0.425935	0.0641035	0.397127	0.0475848	0.387509	0.267389	-0.0197411	0.933062	-0.142529	0.701094	-0.0182557	0.973623	0.124324	0.78906	0.284714	0.08172	0.303975	0.0819391	0.362252	0.191392	aparc-a2009s_lh_volume_S-orbital-H-Shaped	Volume of S-orbital-H-Shaped in the left hemisphere generated by parcellation of the white surface using Destrieux (a2009s) parcellation
GCST90003980	0.52509	0.1825	0.435743	0.134837	0.556818	0.209278	-0.26176	0.0113306	0.519302	0.00279081	-0.299636	0.27411	-0.130938	0.603032	0.122746	0.504241	0.0469865	0.870013	-0.00694637	0.975796	-0.224123	0.629507	0.170713	0.527229	0.241883	0.431211	-0.312175	0.0183893	IDP_dMRI_TBSS_MO_Posterior_thalamic_radiation_R	Mean MO (diffusion tensor mode) in posterior thalamic radiation (right) on FA (fractional anisotropy) skeleton (from dMRI data)
GCST90003632	0.177709	0.322771	0.275586	0.270362	0.0802591	0.783724	-0.142634	0.137295	-0.190511	0.303172	0.0761394	0.69804	-0.133168	0.763769	-0.193015	0.464401	-0.794151	0.0569539	0.00960853	0.976477	-0.468733	0.412436	-0.146529	0.032565	-0.19874	0.012227	-0.0891396	0.46332	aparc-a2009s_lh_thickness_G-precuneus	Mean thickness of G-precuneus in the left hemisphere generated by parcellation of the white surface using Destrieux (a2009s) parcellation
GCST90003445	-0.102742	0.329226	0.121363	0.493259	-0.232335	0.120206	-0.117788	0.106752	-0.291178	0.181122	-0.152381	0.392151	0.0988373	0.675237	-0.12621	0.65814	-0.212474	0.634427	0.00942686	0.978011	0.0259844	0.963653	-0.128029	0.021309	-0.136884	0.0484346	0.00916269	0.935647	aparc-Desikan_lh_thickness_GlobalMeanThickness	Mean thickness of GlobalMeanMean thickness in the left hemisphere generated by parcellation of the white surface using Desikan-Killiany parcellation
GCST90004444	-0.0293968	0.712754	-0.107788	0.279315	0.0179952	0.828517	0.022228	0.648463	0.0761492	0.480267	-0.0308794	0.741231	0.134553	0.392129	0.185928	0.0985373	0.468847	0.0078393	-0.00366863	0.979064	0.440592	0.0464184	0.0152736	0.730424	-0.0205193	0.665431	0.0750997	0.282348	IDP_dMRI_TBSS_OD_Superior_fronto-occipital_fasciculus_R	Mean OD (orientation dispersion index) in superior fronto-occipital fasciculus (right) on FA (fractional anisotropy) skeleton (from dMRI data)
GCST90002573	-0.149585	0.0749618	-0.168757	0.0534546	-0.121311	0.200158	-0.165069	0.00620285	-0.113513	0.313712	-0.134726	0.112909	-0.266086	0.0606538	0.0127996	0.901707	-0.0301367	0.892103	-0.00351366	0.979142	-0.0104661	0.969475	-0.139281	0.00361058	-0.0893165	0.124612	-0.165528	0.00629714	IDP_T1_FAST_ROIs_V_cerebellum_crus_II	Volume of grey matter in Vermis Crus II Cerebellum
GCST90003207	0.200083	0.0297773	0.214858	0.119283	0.197369	0.085756	0.0147707	0.855774	0.106723	0.832697	0.316363	0.268454	0.284694	0.27392	0.0182278	0.90069	-0.0702094	0.75886	-0.00473307	0.979286	-0.172655	0.727119	0.0641324	0.595438	0.0487348	0.666554	0.167733	0.551052	BA-exvivo_lh_area_BA1	Area of BA1 in the left hemisphere generated by parcellation of the white surface using BA_exvivo parcellation
GCST90003398	0.192107	0.0297269	0.20635	0.119069	0.189487	0.085683	0.0141098	0.856448	0.101953	0.833509	0.30337	0.269421	0.273488	0.273497	0.0175539	0.900355	-0.06725	0.759326	-0.00446734	0.97963	-0.165229	0.727971	0.0614371	0.596332	0.0466652	0.667424	0.160715	0.551965	aparc-a2009s_rh_area_G-postcentral	Area of G-postcentral in the right hemisphere generated by parcellation of the white surface using Destrieux (a2009s) parcellation
GCST90002779	-0.116303	0.389007	-0.306372	0.129138	0.0137515	0.934975	0.173432	0.2192	-0.0443015	0.86085	0.243104	0.224714	0.475875	0.152978	0.104134	0.638467	0.0737915	0.8345	0.00661412	0.980907	0.13443	0.762923	0.222818	0.0365172	0.130532	0.364215	0.336669	0.0236358	aparc-Desikan_lh_volume_lateralorbitofrontal	Volume of lateralorbitofrontal in the left hemisphere generated by parcellation of the white surface using Desikan-Killiany parcellation
GCST90003888	-0.0210388	0.833699	-0.203195	0.175401	0.0966914	0.439902	0.128958	0.136003	0.100765	0.598929	-0.100064	0.812164	0.142722	0.694406	0.0139039	0.964362	-0.133832	0.86933	-0.00482928	0.981286	-0.102981	0.887316	0.128681	0.245484	0.173717	0.0418857	0.0638023	0.806624	IDP_dMRI_TBSS_FA_Inferior_cerebellar_peduncle_L	Mean FA (fractional anisotropy) in inferior cerebellar peduncle (left) on FA skeleton (from dMRI data)
GCST90003912	0.0951824	0.38332	-0.085528	0.600617	0.233314	0.0871831	0.17824	0.0463815	0.103608	0.602684	-0.109269	0.714094	0.260649	0.578991	-0.00824404	0.979987	-0.290147	0.598632	0.00538075	0.981483	-0.395854	0.313303	0.129919	0.0568479	0.169164	0.0453826	0.198701	0.528736	IDP_dMRI_TBSS_FA_Cingulum_cingulate_gyrus_L	Mean FA (fractional anisotropy) in cingulum cingulate gyrus (left) on FA skeleton (from dMRI data)
GCST90002577	-0.0110308	0.878365	0.0498466	0.599234	-0.0428119	0.542595	-0.0226263	0.73453	-0.133242	0.277096	-0.152292	0.0268284	0.144079	0.205601	0.0890627	0.31575	0.403431	0.0442814	0.00238178	0.982536	0.359071	0.105652	-0.0148265	0.798698	0.00655236	0.920998	-0.00692546	0.9068	IDP_T1_FAST_ROIs_R_cerebellum_VIIb	Volume of grey matter in Right VIIb Cerebellum
GCST90003537	0.0170823	0.908054	0.346563	0.2389	-0.19088	0.492876	-0.11735	0.116637	-0.408035	0.095278	-0.250103	0.244089	0.218406	0.365952	-0.324882	0.302554	-0.410557	0.403369	-0.00652727	0.986094	-0.0107115	0.987785	-0.140859	0.0499081	-0.151321	0.0595191	-0.0306993	0.801425	BA-exvivo_rh_thickness_V2	Mean thickness of V2 in the right hemisphere generated by parcellation of the white surface using BA_exvivo parcellation
GCST90003208	0.0409431	0.725615	0.00879421	0.957759	0.0509422	0.58613	0.0102313	0.875216	0.322271	0.154474	0.349375	0.00596906	-0.302386	0.435266	0.005548	0.966942	-0.0630156	0.763888	0.00272814	0.987145	-0.330481	0.203731	0.0802299	0.206102	0.053596	0.463392	0.184987	0.307556	BA-exvivo_lh_area_BA2	Area of BA2 in the left hemisphere generated by parcellation of the white surface using BA_exvivo parcellation
GCST90004039	0.125462	0.282571	0.132999	0.422864	0.119338	0.212393	0.0709387	0.214429	0.0992781	0.566046	0.277525	0.0214345	-0.230639	0.337302	-0.0217889	0.935979	-0.21053	0.576582	0.00367421	0.988305	0.101165	0.844456	0.0832312	0.171738	0.081841	0.168018	0.134612	0.121488	IDP_dMRI_TBSS_MD_Superior_cerebellar_peduncle_R	Mean MD (mean diffusivity) in superior cerebellar peduncle (right) on FA (fractional anisotropy) skeleton (from dMRI data)
GCST90006006	0.0980234	0.400334	0.0813864	0.631536	0.0804405	0.585145	0.0442563	0.649546	0.242068	0.550569	0.466747	0.0706544	0.221466	0.481008	0.078269	0.680305	0.162891	0.717204	0.0029299	0.990123	-0.121398	0.868553	0.16553	0.0253132	0.102257	0.263538	0.384381	0.00849097	rfMRI connectivity (ICA100 edge 1153)
GCST90004208	-0.0889055	0.145739	0.00343671	0.970017	-0.147541	0.0533279	-0.0939077	0.0705225	-0.201235	0.080532	0.0590525	0.60428	0.178432	0.285814	0.0634276	0.753444	0.0378086	0.906014	0.00209021	0.990561	0.0694971	0.823415	-0.0763068	0.0525129	-0.112261	0.0311522	0.000520103	0.996673	IDP_dMRI_TBSS_L3_Cingulum_hippocampus_L	Mean L3 in cingulum hippocampus (left) on FA (fractional anisotropy) skeleton (from dMRI data)
GCST90003995	-0.111098	0.396569	-0.155485	0.523102	-0.106748	0.558457	-0.247117	0.022558	-0.222813	0.347572	0.00996941	0.983153	0.0794817	0.851464	0.0707398	0.734243	0.126018	0.723188	-0.00255643	0.99214	0.31314	0.443247	-0.159995	0.0514637	-0.144793	0.15846	0.0810228	0.655932	IDP_dMRI_TBSS_MO_Superior_fronto-occipital_fasciculus_L	Mean MO (diffusion tensor mode) in superior fronto-occipital fasciculus (left) on FA (fractional anisotropy) skeleton (from dMRI data)
GCST90003999	0.219503	0.055822	0.366069	0.032989	0.136108	0.486767	0.000690097	0.99318	0.18909	0.355495	-0.382824	0.209006	-0.176275	0.501526	0.00046385	0.998318	0.216932	0.530147	-0.00210656	0.993847	0.179648	0.680166	-0.000482238	0.995577	0.041212	0.665122	-0.170673	0.292012	IDP_dMRI_TBSS_MO_Tapetum_L	Mean MO (diffusion tensor mode) in tapetum (left) on FA (fractional anisotropy) skeleton (from dMRI data)
GCST90004156	-0.0598247	0.41647	-0.0247378	0.778785	-0.092925	0.271146	-0.0961133	0.192181	0.0772341	0.520417	-0.0147124	0.925391	-0.0946001	0.727051	0.204208	0.15695	0.369227	0.0430455	0.00145607	0.994993	0.468938	0.0401543	-0.0646224	0.293847	-0.11008	0.156962	-0.0734779	0.553338	IDP_dMRI_TBSS_L2_External_capsule_L	Mean L2 in external capsule (left) on FA (fractional anisotropy) skeleton (from dMRI data)
GCST90002637	0.177081	0.0412472	0.0256643	0.843505	0.285798	0.00832731	0.0220112	0.756541	-0.283649	0.138594	-0.111511	0.484815	0.184001	0.418854	0.122169	0.438049	0.367026	0.135122	-0.00136949	0.995249	0.372705	0.225487	0.0213492	0.713546	-0.0560471	0.402837	0.0345439	0.734358	aseg_rh_volume_Thalamus-Proper	Volume of Thalamus-Proper in the right hemisphere generated by subcortical volumetric segmentation (aseg)
GCST90002525	-0.0142082	0.910502	0.129576	0.394588	-0.11722	0.520517	0.00880298	0.960831	-0.441639	0.004158	-0.0617667	0.642573	0.558044	0.0119829	0.00476185	0.975453	0.0966121	0.808073	0.00102505	0.995724	0.0909327	0.764918	-0.0117231	0.919451	0.172096	0.0252009	0.148466	0.311179	IDP_T1_FAST_ROIs_L_temp_fusif_cortex_post	Volume of grey matter in Left Temporal Fusiform Cortex, posterior division
GCST90002885	0.00176385	0.987251	-0.00737008	0.957088	-0.00151819	0.989286	0.0057667	0.928627	0.0959683	0.603455	0.279263	0.0449292	-0.214724	0.299584	0.10415	0.751718	0.284387	0.46995	0.00217057	0.996295	0.204558	0.692173	-0.0109542	0.822818	-0.043943	0.469408	0.096566	0.325053	aparc-DKTatlas_lh_volume_precuneus	Volume of precuneus in the left hemisphere generated by parcellation of the white surface using DKT parcellation
GCST90003408	0.488372	0.000277551	0.389483	0.052707	0.530027	0.00155171	0.211265	0.0412168	0.479632	0.250628	0.153856	0.439309	0.265342	0.657237	0.0178296	0.967056	0.216854	0.726105	-0.000648237	0.998494	0.290261	0.65861	0.2157	0.258465	0.28388	0.045035	0.314843	0.0955699	aparc-a2009s_rh_area_G-temporal-middle	Area of G-temporal-middle in the right hemisphere generated by parcellation of the white surface using Destrieux (a2009s) parcellation
GCST90003180	0	1	0	1	0	1	0.384724	1.10829e-06	0.617241	0.000483368	0.242642	0.108359	0.426239	0.19237	0	1	0	1	0	1	0	1	0.401609	1.83401e-11	0	1	0	1	aparc-pial_rh_area_fusiform	Area of fusiform in the right hemisphere generated by parcellation of the pial surface using Desikan-Killiany parcellation
GCST90003426	-0.127357	0.439704	-0.148371	0.519627	-0.109391	0.472525	0.0748857	0.392999	0.462417	0.00649096	0.279749	0.108209	-0.458422	0.0567961	0	1	0	1	0	1	0	1	0.095339	0.106657	0.0891085	0.207653	0.207442	0.056415	aparc-a2009s_rh_area_S-intrapariet+P-trans	Area of S-intrapariet+P-trans in the right hemisphere generated by parcellation of the white surface using Destrieux (a2009s) parcellation
GCST90002484	0.0703875	0.64295	-0.0134488	0.950216	0.102232	0.453541	0.00209892	0.987072	0.609615	0.00872845	0.351814	0.442507	0.130365	0.698883	0	1	0	1	0	1	0	1	0.0842842	0.621665	0.117031	0.232905	0.213203	0.605932	IDP_T1_FAST_ROIs_R_postcent_gyrus	Volume of grey matter in Right Postcentral Gyrus
GCST90002907	0.175654	0.157077	0.0590977	0.822307	0.244523	0.0555567	0.268709	0.01082	0.565635	0.0146096	0.038662	0.850595	0.751163	0.230765	0	1	0	1	0	1	0	1	0.187543	0.0193954	0.188173	0.322091	0.289262	0.0551405	aparc-DKTatlas_rh_volume_parahippocampal	Volume of parahippocampal in the right hemisphere generated by parcellation of the white surface using DKT parcellation
GCST90002816	0.178026	0.165527	0.0577417	0.830089	0.249197	0.0558737	0.274578	0.0109766	0.576796	0.0150042	0.0387636	0.853702	0.774679	0.221251	0	1	0	1	0	1	0	1	0.191549	0.0196965	0.190729	0.331886	0.296935	0.054486	aparc-Desikan_rh_volume_parahippocampal	Volume of parahippocampal in the right hemisphere generated by parcellation of the white surface using Desikan-Killiany parcellation
GCST90003054	-0.272243	0.212454	-0.313769	0.0568975	-0.266149	0.31739	0.0806584	0.358322	0.508761	0.0190573	-0.0164053	0.923152	-0.531357	0.0862169	0	1	0	1	0	1	0	1	0.0576966	0.385667	0.0760974	0.354514	0.0989861	0.432587	aparc-a2009s_rh_volume_S-intrapariet+P-trans	Volume of S-intrapariet+P-trans in the right hemisphere generated by parcellation of the white surface using Destrieux (a2009s) parcellation
GCST90002849	0.0928796	0.102981	0.134162	0.115613	0.0730504	0.304236	-0.00154463	0.98393	-0.247654	0.0232236	0.0126759	0.899258	0.210905	0.169232	0	1	0	1	0	1	0	1	-0.0244851	0.500621	-0.0299692	0.501981	-0.0409604	0.606798	BA-exvivo_rh_volume_BA1	Volume of BA1 in the right hemisphere generated by parcellation of the white surface using BA_exvivo parcellation
GCST90004514	-0.0413955	0.781538	-0.198437	0.374277	0.0758046	0.683952	-0.080054	0.483159	-0.438513	0.02507	-0.00990322	0.955021	-0.765722	0.00720871	0	1	0	1	0	1	0	1	-0.0203099	0.771468	-0.0311447	0.723125	-0.133349	0.329428	IDP_dMRI_TBSS_ISOVF_Cingulum_hippocampus_L	Mean ISOVF (isotropic or free water volume fraction) in cingulum hippocampus (left) on FA (fractional anisotropy) skeleton (from dMRI data)
GCST90003192	0	1	0	1	0	1	-0.0841674	0.368794	-0.44248	0.0333655	-0.474519	0.0185814	0.142156	0.63963	0	1	0	1	0	1	0	1	-0.14848	0.0383635	-0.14415	0.102947	-0.290922	0.163262	aparc-pial_rh_area_parsorbitalis	Area of parsorbitalis in the right hemisphere generated by parcellation of the pial surface using Desikan-Killiany parcellation
GCST90003098	0	1	0	1	0	1	0.254391	0.437904	0.594218	0.0379831	0.103195	0.628522	1.11356	0.00302517	0	1	0	1	0	1	0	1	0.354118	0.198889	0	1	0	1	aparc-Desikan_lh_area_rostralanteriorcingulate	Area of rostralanteriorcingulate in the left hemisphere generated by parcellation of the white surface using Desikan-Killiany parcellation
GCST90003566	0	1	0	1	0	1	-0.109353	0.222849	-0.408172	0.0389636	-0.3515	0.22075	-0.319617	0.267747	0	1	0	1	0	1	0	1	-0.202608	0.0032634	-0.145263	0.0899234	-0.221051	0.0935239	aparc-DKTatlas_lh_thickness_superiorfrontal	Mean thickness of superiorfrontal in the left hemisphere generated by parcellation of the white surface using DKT parcellation
GCST90003060	-0.145588	0.214639	-0.153182	0.383219	-0.133353	0.362508	-0.10049	0.311247	-0.442595	0.0448047	-0.475174	0.0534451	0.146414	0.648903	0	1	0	1	0	1	0	1	-0.150788	0.0473642	-0.168801	0.0720323	-0.291987	0.225691	aparc-a2009s_rh_volume_S-orbital-lateral	Volume of S-orbital-lateral in the right hemisphere generated by parcellation of the white surface using Destrieux (a2009s) parcellation
GCST90003983	0.281597	0.0346535	0.283676	0.154305	0.294498	0.0764534	0.291253	0.258383	0.47871	0.0508509	0.517195	0.123568	-0.0780933	0.817933	0	1	0	1	0	1	0	1	0.276578	0.241774	0	1	0	1	IDP_dMRI_TBSS_MO_Sagittal_stratum_L	Mean MO (diffusion tensor mode) in sagittal stratum (left) on FA (fractional anisotropy) skeleton (from dMRI data)
GCST90003749	0	1	0	1	0	1	-0.551136	3.44299e-08	-0.711416	0.0689727	-0.325584	0.0884757	-0.203664	0.751836	0	1	0	1	0	1	0	1	-0.429728	0.0246893	-0.457679	0.0101634	-0.350323	0.0616152	aparc-a2009s_rh_thickness_S-temporal-sup	Mean thickness of S-temporal-sup in the right hemisphere generated by parcellation of the white surface using Destrieux (a2009s) parcellation
GCST90002774	0	1	0.284113	0.458091	0.613879	0.125549	0.340414	0.0433489	0.425343	0.0715428	-0.0646447	0.671195	0.302475	0.294534	0	1	0	1	0	1	0	1	0.331697	0.0296815	0.357585	0.0118247	0.0326296	0.90858	aparc-Desikan_lh_volume_fusiform	Volume of fusiform in the left hemisphere generated by parcellation of the white surface using Desikan-Killiany parcellation
GCST90002807	0	1	0	1	0	1	0.537908	2.23047e-07	0.605354	0.0860666	0.0226706	0.909315	0.527149	0.168382	0	1	0	1	0	1	0	1	0.500634	1.21566e-05	0.516574	6.78156e-06	0.225625	0.53491	aparc-Desikan_rh_volume_fusiform	Volume of fusiform in the right hemisphere generated by parcellation of the white surface using Desikan-Killiany parcellation
GCST90003952	0.243728	0.00753862	0.135246	0.322023	0.330981	0.00355499	0.213128	0.121239	0.29329	0.0964402	0.255185	0.233557	-0.130316	0.614606	0	1	0	1	0	1	0	1	0.203634	0.000871608	0.253059	0.000888883	0.322	0.0382845	IDP_dMRI_TBSS_MO_Middle_cerebellar_peduncle	Mean MO (diffusion tensor mode) in middle cerebellar peduncle on FA (fractional anisotropy) skeleton (from dMRI data)
GCST90002487	0.218817	0.0431893	0.343868	0.154935	0.10913	0.418886	0.121693	0.210366	0.39643	0.102262	0.507	0.00737925	0.0597391	0.847983	0	1	0	1	0	1	0	1	0.165578	0.0260936	0.0936701	0.312028	0.252668	0.375892	IDP_T1_FAST_ROIs_L_supramarg_gyrus_ant	Volume of grey matter in Left Supramarginal Gyrus, anterior division
GCST90004709	0.111255	0.311155	0.170343	0.517189	0.0583676	0.670346	-0.200442	0.0263803	-0.315394	0.107723	-0.483477	0.00456569	0.123099	0.674383	0	1	0	1	0	1	0	1	-0.115337	0.095923	-0.155498	0.068474	-0.134272	0.309472	rfMRI connectivity (ICA25 edge 66)
GCST90002947	-0.151942	0.0810086	-0.162493	0.213337	-0.153197	0.159221	0.196837	0.040336	0.258968	0.132058	0.00845645	0.954576	0.131364	0.600264	0	1	0	1	0	1	0	1	0.11647	0.406513	0.074724	0.685116	0.0500395	0.826518	aparc-a2009s_lh_volume_G-oc-temp-med-Parahip	Volume of G-oc-temp-med-Parahip in the left hemisphere generated by parcellation of the white surface using Destrieux (a2009s) parcellation
GCST90003775	0	1	0	1	0	1	-0.196249	0.0361505	-0.304754	0.132076	-0.0752355	0.669654	0.428319	0.153455	0	1	0	1	0	1	0	1	-0.114975	0.106501	-0.198896	0.0244285	0.0519595	0.69725	aseg_lh_intensity_VentralDC	Mean intensity of VentralDC in the left hemisphere generated by subcortical volumetric segmentation (aseg)
GCST90002794	0	1	0	1	0	1	0.0429568	0.729889	0.313353	0.190004	0.301995	0.14557	0.233633	0.501059	0	1	0	1	0	1	0	1	0.118751	0.150041	0.0098892	0.937774	0.371515	0.0179545	aparc-Desikan_lh_volume_rostralmiddlefrontal	Volume of rostralmiddlefrontal in the left hemisphere generated by parcellation of the white surface using Desikan-Killiany parcellation
GCST90003047	-0.0652416	0.562452	-0.114097	0.498254	-0.00604832	0.965697	-0.0853083	0.428678	-0.280255	0.239224	-0.562656	0.0115849	-0.682989	0.0482624	0	1	0	1	0	1	0	1	-0.173377	0.0346715	-0.0416619	0.685196	-0.321234	0.0685346	aparc-a2009s_rh_volume_S-circular-insula-sup	Volume of S-circular-insula-sup in the right hemisphere generated by parcellation of the white surface using Destrieux (a2009s) parcellation
GCST90003652	0	1	0	1	0	1	-0.457768	1.70836e-06	-0.426445	0.275033	-0.0820974	0.65043	-0.366744	0.529589	0	1	0	1	0	1	0	1	-0.408744	0.0193343	0	1	0	1	aparc-a2009s_lh_thickness_S-collat-transv-ant	Mean thickness of S-collat-transv-ant in the left hemisphere generated by parcellation of the white surface using Destrieux (a2009s) parcellation
GCST90002974	-0.11907	0.242337	-0.0886877	0.561457	-0.13488	0.288656	0.194329	0.0492173	-0.234921	0.280444	-0.195104	0.302974	-0.258293	0.415045	0	1	0	1	0	1	0	1	0.112921	0.145845	0.103507	0.264083	-0.24056	0.0889849	aparc-a2009s_lh_volume_S-collat-transv-ant	Volume of S-collat-transv-ant in the left hemisphere generated by parcellation of the white surface using Destrieux (a2009s) parcellation
GCST90005301	0	1	0	1	0	1	0.205758	0.0479152	0.337665	0.280484	-0.0100111	0.95999	-0.373879	0.281705	0	1	0	1	0	1	0	1	0.127622	0.117468	0	1	0	1	rfMRI connectivity (ICA100 edge 448)
GCST90003726	0	1	0	1	0	1	-0.272126	0.00117854	-0.152177	0.414113	-0.123373	0.522885	-0.0196258	0.942511	0	1	0	1	0	1	0	1	-0.259101	5.74278e-05	-0.260313	0.00107638	0.0100213	0.951512	aparc-a2009s_rh_thickness_S-collat-transv-ant	Mean thickness of S-collat-transv-ant in the right hemisphere generated by parcellation of the white surface using Destrieux (a2009s) parcellation
GCST90003916	0	1	0	1	0	1	0.395001	0.103213	0.372712	0.483171	0.112311	0.572138	0.297263	0.602477	0	1	0	1	0	1	0	1	0.360145	0.18443	0.321246	0.377591	0.340545	0.023765	IDP_dMRI_TBSS_FA_Fornix_cres+Stria_terminalis_L	Mean FA (fractional anisotropy) in fornix cres+stria terminalis (left) on FA skeleton (from dMRI data)
GCST90003741	0	1	0	1	0	1	-0.123955	0.22123	-0.321765	0.514516	-0.390417	0.0467404	-0.0410952	0.89978	0	1	0	1	0	1	0	1	-0.236865	0.00216923	-0.245198	0.0108895	-0.279031	0.0579799	aparc-a2009s_rh_thickness_S-parieto-occipital	Mean thickness of S-parieto-occipital in the right hemisphere generated by parcellation of the white surface using Destrieux (a2009s) parcellation
GCST90003383	-0.130884	0.249494	-0.122521	0.471413	-0.106025	0.454694	-0.0337377	0.73481	-0.251688	0.552317	-0.512066	0.0151208	-0.266819	0.406921	0	1	0	1	0	1	0	1	-0.164676	0.0295302	-0.0970065	0.301565	-0.389382	0.0064541	aparc-a2009s_rh_area_G-front-inf-Orbital	Area of G-front-inf-Orbital in the right hemisphere generated by parcellation of the white surface using Destrieux (a2009s) parcellation
GCST90004436	0	1	0	1	0	1	-0.0345002	0.737595	0.13266	0.557601	-0.133949	0.538722	-0.680025	0.040563	0	1	0	1	0	1	0	1	-0.05292	0.49878	-0.0107752	0.911528	-0.155308	0.56436	IDP_dMRI_TBSS_OD_Cingulum_cingulate_gyrus_R	Mean OD (orientation dispersion index) in cingulum cingulate gyrus (right) on FA (fractional anisotropy) skeleton (from dMRI data)
GCST90004587	-0.335894	0.00393053	-0.365159	0.0364974	-0.30129	0.0383016	-0.0316437	0.783512	0.137833	0.587836	-0.363381	0.237918	-0.656343	0.072601	0	1	0	1	0	1	0	1	-0.0201682	0.816545	0.116252	0.287475	-0.435882	0.0080483	rfMRI amplitudes (ICA25 node 20)
GCST90004579	0.0337914	0.735152	0.164958	0.200388	-0.0574386	0.59271	-0.0908477	0.288553	-0.0938791	0.653088	-0.328209	0.00699467	0.218438	0.298566	0	1	0	1	0	1	0	1	-0.0997402	0.040651	-0.0854129	0.156746	-0.095146	0.408957	rfMRI amplitudes (ICA25 node 12)
GCST90003344	-0.0134183	0.931924	0.11084	0.713392	-0.114896	0.557753	0.0204028	0.857964	0.0878501	0.718179	-0.221825	0.54879	0.701392	0.0448809	0	1	0	1	0	1	0	1	0.0908635	0.278663	0.00436456	0.974565	0.125741	0.492113	aparc-a2009s_lh_area_S-circular-insula-inf	Area of S-circular-insula-inf in the left hemisphere generated by parcellation of the white surface using Destrieux (a2009s) parcellation
GCST90004455	-0.266515	0.0472665	-0.423556	0.0449859	-0.161757	0.334305	-0.104729	0.359377	-0.0323813	0.898237	-0.124177	0.582629	-0.955848	0.181788	0	1	0	1	0	1	0	1	-0.113001	0.198447	-0.119595	0.267756	-0.272318	0.41479	IDP_dMRI_ProbtrackX_OD_cgc_r	Weighted-mean OD (orientation dispersion index) in tract right cingulate gyrus part of cingulum (from dMRI data)
GCST90003643	0.036349	0.780918	0.139827	0.47461	-0.0209931	0.897588	-0.0642957	0.581979	0.0263377	0.915936	0.188585	0.402758	-0.772369	0.0347141	0	1	0	1	0	1	0	1	-0.119355	0.140179	0	1	0	1	aparc-a2009s_lh_thickness_Lat-Fis-post	Mean thickness of Lat-Fis-post in the left hemisphere generated by parcellation of the white surface using Destrieux (a2009s) parcellation
GCST90005986	0.217675	0.241669	0.505231	0.0692002	-0.0298893	0.897538	-0.0341974	0.783754	-0.0187302	0.932295	-0.00294488	0.989326	0.630165	0.0463952	0	1	0	1	0	1	0	1	0.0138769	0.910071	0.0406625	0.694385	0.0559024	0.875017	rfMRI connectivity (ICA100 edge 1133)
GCST90004430	-0.826841	0.0460549	-0.646163	0.098373	-0.914404	0.0181497	0	1	-0.0498646	0.95133	0.563966	0.0542101	0.166023	0.671059	0	1	0	1	0	1	0	1	-0.0796565	0.902365	0	1	0	1	IDP_dMRI_TBSS_OD_Posterior_thalamic_radiation_R	Mean OD (orientation dispersion index) in posterior thalamic radiation (right) on FA (fractional anisotropy) skeleton (from dMRI data)
GCST90004432	0	1	0	1	0	1	0.0527105	0.638168	-0.00761925	0.975454	0.0574122	0.789538	0.629252	0.0721301	0	1	0	1	0	1	0	1	0.0853095	0.318711	0.0854668	0.421352	0.39719	0.0135553	IDP_dMRI_TBSS_OD_Sagittal_stratum_R	Mean OD (orientation dispersion index) in sagittal stratum (right) on FA (fractional anisotropy) skeleton (from dMRI data)
GCST90002511	-0.209825	0.0264938	-0.280772	0.0471145	-0.157419	0.182155	0	1	0	1	0	1	0	1	0	1	0	1	0	1	0	1	0.0257212	0.731059	-0.0710441	0.471788	0.222667	0.285566	IDP_T1_FAST_ROIs_L_precun_cortex	Volume of grey matter in Left Precuneous Cortex
GCST90004814	-0.12331	0.152127	-0.313238	0.0150394	-0.00380723	0.971833	0	1	0	1	0	1	0	1	0	1	0	1	0	1	0	1	0	1	0	1	0	1	rfMRI connectivity (ICA25 edge 171)
β represents the effect estimate in the MR analysis. P denotes the significance level in the MR analysis. fg_BC refers to breast cancer in FinnGen. fg_ERplus refers to ER-positive breast cancer in FinnGen. fg_ERneg refers to ER-negative breast cancer in FinnGen. pb53_luminalA corresponds to GCST90454345. pb53_luminalB corresponds to GCST90454346. pb53_TNBC corresponds to GCST90454344. pb53_HER2ri…

## Sheet: Supplementary table 3
Supplementary table 3. Top ten IDPs for the 14 outcomes
fg_BC	fg_ERplus	fg_ERneg	pb53_BC	pb53_luminalA	pb53_luminalB	pb53_TNBC	pb53_HER2	pb14_BC	pb14_ERneg	pb14_ERplus	pb14_TNBC	ieu1127_ERplus	ieu1128_ERneg
Mean_lateralorbitofrontal_thickavg_20200522_noGC	Mean_lateralorbitofrontal_thickavg_20200522_noGC	GCST90002768	GCST90003180	GCST90003749	GCST90003535	GCST90003065	Mean_inferiorparietal_thickavg_20200522_noGC	GCST90003897	GCST90004471	GCST90002765	GCST90002724	GCST90003079	Mean_middletemporal_thickavg_20200522_noGC
GCST90002644	GCST90003408	GCST90002644	GCST90003079	GCST90002807	GCST90003322	GCST90004229	GCST90003098	GCST90004615	GCST90004609	GCST90003897	GCST90005893	GCST90003360	Mean_fusiform_thickavg_20200522_noGC
GCST90002627	GCST90002644	GCST90002602	GCST90003556	GCST90003180	GCST90003263	GCST90003448	Mean_middletemporal_thickavg_20200522_noGC	GCST90004609	GCST90002845	GCST90002768	GCST90003121	GCST90002807	GCST90002872
GCST90002767	GCST90002767	GCST90003523	GCST90002872	GCST90003652	GCST90003479	GCST90003542	GCST90003571	GCST90003278	GCST90002893	GCST90002450	GCST90002549	Mean_inferiortemporal_thickavg_20200522_noGC	GCST90003714
GCST90003408	GCST90002627	GCST90002627	GCST90002807	GCST90003079	GCST90003218	GCST90003320	Mean_inferiortemporal_thickavg_20200522_noGC	GCST90002765	GCST90003121	GCST90002859	GCST90005814	GCST90002725	GCST90003263
GCST90002549	GCST90006345	GCST90002562	GCST90003472	Mean_inferiortemporal_thickavg_20200522_noGC	GCST90002625	GCST90004465	GCST90004514	GCST90002638	GCST90004615	GCST90004544	GCST90003972	GCST90003503	GCST90003103
GCST90002619	GCST90003952	GCST90003145	GCST90003293	GCST90004045	GCST90003180	GCST90004332	GCST90004551	GCST90002768	GCST90004633	GCST90004075	GCST90006342	GCST90003594	GCST90003065
GCST90003279	GCST90002619	GCST90003169	GCST90003726	GCST90003950	GCST90002716	GCST90003935	GCST90003899	GCST90004397	GCST90003922	Mean_parsopercularis_surfavg_20190429_noGC	GCST90004615	GCST90003589	GCST90003322
GCST90003189	GCST90003189	GCST90003084	GCST90003535	GCST90003927	GCST90003227	GCST90003257	GCST90004056	GCST90002859	GCST90003434	GCST90003129	GCST90003878	GCST90003556	GCST90002707
GCST90006002	GCST90003538	GCST90003077	GCST90003475	GCST90002443	Mean_fusiform_surfavg_20190429_noGC	GCST90003097	GCST90003972	GCST90002723	GCST90004581	GCST90002602	Mean_supramarginal_surfavg_20190429_noGC	GCST90004115	GCST90002633

## Sheet: Supplementary tabe 4
Supplementary table 4. Summary of Colocalization analysis
Outcome__expouse	CHR	Genes	Nsnp	PP.H0	PP.H1	PP.H2	PP.H3	PP.H4
ieu_a_1127__GCST90003079	17	CTB-39G8.3	518	4.72602e-19	0.000726455	5.79303e-18	0.00791334	0.99136
ieu_a_1127__GCST90003079	17	RN7SL730P	358	2.58527e-19	0.000676515	4.40552e-18	0.0105396	0.988784
ieu_a_1127__GCST90003079	17	ARHGAP27	440	2.58652e-19	0.000676499	4.41649e-18	0.0105625	0.988761
ieu_a_1127__GCST90003079	17	AC091132.2	481	2.58595e-19	0.000676494	4.41833e-18	0.0105698	0.988754
ieu_a_1127__GCST90003079	17	PLEKHM1	339	2.04443e-19	0.000652165	6.75388e-18	0.0205659	0.978782
ieu_a_1127__GCST90003079	17	RP11-798G7.5	317	1.75907e-19	0.0006365	6.47958e-18	0.0224687	0.976895
GCST90454345_pb53luminaA__GCST90003652	17	ENSG00000267198	428	3.32442e-09	0.00123932	1.09404e-07	0.0398261	0.958934
ieu_a_1127__GCST90003079	17	RP11-995C19.2	25	9.41223e-14	0.0481595	6.95364e-15	0.00260873	0.949232
ieu_a_1127__GCST90003079	17	LRRC37A2	28	9.42968e-14	0.0481591	6.97495e-15	0.002613	0.949228
ieu_a_1127__GCST90003079	17	ARL17A	35	1.93216e-14	0.0496102	1.74582e-15	0.00353572	0.946854
ieu_a_1127__GCST90003079	17	NSF	38	1.92984e-14	0.0497434	1.79317e-15	0.00367549	0.946581
ieu_a_1127__GCST90003079	17	RN7SL739P	289	7.0704e-20	0.00111444	4.14836e-18	0.064452	0.934434
ieu_a_1127__GCST90003079	17	NSFP1	100	2.27043e-20	0.00271823	6.20468e-19	0.0733603	0.923922
ieu_a_1127__GCST90003079	17	WNT3	517	7.7044e-16	0.026982	1.47422e-15	0.0507072	0.922311
ieu_a_1127__GCST90003079	17	RP11-798G7.8	295	4.96468e-20	0.00125337	3.17807e-18	0.0793135	0.919433
ieu_a_1127__GCST90003079	17	RPS7P11	251	6.45222e-16	0.0290632	1.38105e-15	0.061298	0.909639
ieu_a_1127__GCST90003079	17	RN7SL199P	31	7.13363e-14	0.0928903	5.42549e-15	0.00616384	0.900946
ieu_a_1127__GCST90003079	17	FAM215B	29	7.25653e-14	0.0950352	3.81097e-15	0.00409016	0.900875
ieu_a_1127__GCST90003079	17	RP11-798G7.6	301	3.25876e-20	0.00136681	2.56879e-18	0.10685	0.891783
GCST90454345_pb53luminaA__GCST90003079	17	NSFP1	268	3.96062e-20	0.0103101	4.04164e-19	0.104324	0.885366
GCST90454345_pb53luminaA__GCST90003079	17	ENSG00000294196	270	3.95745e-20	0.0103027	4.06594e-19	0.104967	0.884731
ieu_a_1127__GCST90003079	17	LRRC37A4P	311	2.83271e-20	0.00139038	2.42062e-18	0.117931	0.880679
GCST90454345_pb53luminaA__GCST90003180	17	NSFP1	269	1.05161e-13	0.0119055	1.07312e-12	0.120623	0.867472
ieu_a_1127__GCST90003079	17	RP11-798G7.4	326	2.41732e-20	0.00141058	2.27124e-18	0.131667	0.866923
ieu_a_1127__GCST90003079	17	RP11-798G7.7	327	2.41707e-20	0.0014105	2.27196e-18	0.131715	0.866875
GCST90454345_pb53luminaA__GCST90003180	17	ENSG00000294196	271	1.04928e-13	0.0119081	1.07805e-12	0.121479	0.866612
GCST90454345_pb53luminaA__GCST90003652	17	NSFP1	268	6.74965e-08	0.0125279	6.88772e-07	0.126981	0.86049
GCST90454345_pb53luminaA__GCST90003652	17	ENSG00000294196	270	6.72888e-08	0.012536	6.91334e-07	0.127937	0.859526
ieu_a_1127__GCST90003079	17	RN7SL656P	265	2.96711e-21	0.00122104	3.70094e-19	0.151455	0.847324
GCST90454345_pb53luminaA__GCST90003749	11	CEP57	644	4.67e-05	0.016	0.000408	0.139	0.844
GCST90454345_pb53luminaA__GCST90003749	11	FAM76B	645	4.42e-05	0.0163	0.000388	0.142	0.841
GCST90454345_pb53luminaA__GCST90002807	17	NSFP1	268	1.55001e-06	0.0147056	1.58171e-05	0.149228	0.836049
GCST90454345_pb53luminaA__GCST90002807	17	ENSG00000294196	270	1.5441e-06	0.0147092	1.58643e-05	0.150289	0.834984
ieu_a_1127__GCST90003079	17	ARL17B	184	1.36098e-20	0.00264264	9.01161e-19	0.174157	0.823201
GCST90454345_pb53luminaA__GCST90003079	12	RPL29P27	644	6.44512e-11	8.91477e-09	0.00130948	0.180306	0.818384
GCST90454345_pb53luminaA__GCST90003749	11	MTMR2L	687	3.17e-05	0.024	0.000211	0.159	0.817
GCST90454345_pb53luminaA__GCST90003749	17	ENSG00000267198	428	3.09525e-05	0.00556605	0.00101862	0.182363	0.811021
GCST90454345_pb53luminaA__GCST90003079	17	ARL17B	410	2.63122e-20	0.0112981	4.23479e-19	0.181028	0.807674
GCST90454345_pb53luminaA__GCST90003749	17	ARL17B	410	1.59171e-05	0.0118136	0.000256176	0.189334	0.79858
GCST90454345_pb53luminaA__GCST90003652	17	ARL17B	410	3.29984e-08	0.011881	5.31089e-07	0.19042	0.797698
GCST90454345_pb53luminaA__GCST90003079	12	CCDC91	685	1.95511e-10	4.12269e-09	0.00933798	0.196113	0.794549
GCST90454345_pb53luminaA__GCST90003180	17	ARL17B	411	4.66775e-14	0.012302	7.51246e-13	0.197203	0.790495
ieu_a_1127__GCST90003079	17	DND1P1	406	1.12046e-20	0.00142511	1.66836e-18	0.211411	0.787164
GCST90454345_pb53luminaA__GCST90003079	17	ENSG00000267198	428	4.53556e-19	0.00647027	1.49262e-17	0.21215	0.781379
GCST90454345_pb53luminaA__GCST90003079	12	IFT57P1	679	1.64799e-10	4.07261e-09	0.00856977	0.211	0.78043
GCST90454345_pb53luminaA__GCST90002807	17	ARL17B	410	7.91393e-07	0.0129718	1.2737e-05	0.207994	0.77902
GCST90454345_pb53luminaA__GCST90003079	12	ENSG00000278733	646	1.46337e-10	3.94701e-09	0.00805066	0.216367	0.775582
GCST90454345_pb53luminaA__GCST90003180	12	CCDC91	685	4.37843e-10	4.30791e-09	0.0209122	0.20498	0.774107
GCST90454345_pb53luminaA__GCST90003079	12	ENSG00000247934	645	1.41092e-10	3.9309e-09	0.00787225	0.218552	0.773575
GCST90454345_pb53luminaA__GCST90003079	12	RNA5SP355	636	4.06811e-11	8.21598e-09	0.00118421	0.238404	0.760411
ieu_a_1127__GCST90003079	17	LRRC37A	340	2.29226e-21	0.001154	4.80413e-19	0.241098	0.757748
GCST90454345_pb53luminaA__GCST90003652	17	ENSG00000304996	552	2.19756e-09	0.00318902	1.69327e-07	0.244969	0.751842
GCST90454345_pb53luminaA__GCST90003652	17	DND1P1	564	2.17707e-09	0.00321929	1.68889e-07	0.248992	0.747788
GCST90454345_pb53luminaA__GCST90003652	17	ENSG00000291175	558	2.17503e-09	0.00322183	1.68802e-07	0.249296	0.747482
GCST90454345_pb53luminaA__GCST90003180	12	IFT57P1	679	3.85277e-10	4.54999e-09	0.0200349	0.235861	0.744105
GCST90454345_pb53luminaA__GCST90003652	17	ENSG00000285668	564	2.15639e-09	0.00325055	1.68398e-07	0.253101	0.743648
GCST90454345_pb53luminaA__GCST90002807	17	ENSG00000267198	428	4.26047e-07	0.00758935	1.40209e-05	0.249016	0.74338
GCST90454345_pb53luminaA__GCST90003749	11	RNA5SP345	635	2.2e-05	0.0204	0.000256	0.237	0.742
ieu_a_1127__GCST90003079	17	RP11-259G18.1	381	2.21915e-21	0.00114555	5.00148e-19	0.25744	0.741415
ieu_a_1127__GCST90003079	17	RP11-259G18.3	389	2.21357e-21	0.0011457	4.99839e-19	0.257966	0.740889
ieu_a_1127__GCST90003079	17	RP11-707O23.5	473	7.8208e-21	0.00143788	1.40624e-18	0.257802	0.74076
GCST90454345_pb53luminaA__GCST90003180	12	ENSG00000278733	646	3.6453e-10	4.43092e-09	0.0200544	0.243027	0.736918
GCST90454345_pb53luminaA__GCST90003079	17	RN7SL656P	596	8.91349e-21	0.00983344	2.30457e-19	0.253505	0.736661
GCST90454345_pb53luminaA__GCST90003180	12	ENSG00000247934	645	3.59262e-10	4.40917e-09	0.0200452	0.245276	0.734678
ieu_a_1127__GCST90003079	17	RP11-259G18.2	412	2.18768e-21	0.00113662	5.10231e-19	0.26436	0.734504
GCST90454345_pb53luminaA__GCST90003180	17	ENSG00000267198	428	3.0231e-14	0.0080209	9.94879e-13	0.263233	0.728746
GCST90454345_pb53luminaA__GCST90003652	17	ENSG00000280022	587	2.08606e-09	0.00341141	1.65405e-07	0.269765	0.726823
GCST90454345_pb53luminaA__GCST90003180	12	RNA5SP355	636	1.36265e-09	8.10037e-09	0.0396664	0.235074	0.72526
ieu_a_1127__GCST90003079	17	RPS26P8	509	6.69322e-21	0.00142059	1.29275e-18	0.273653	0.724927
GCST90454345_pb53luminaA__GCST90003652	17	ENSG00000295828	624	2.00539e-09	0.00355009	1.62701e-07	0.287317	0.709133
GCST90454345_pb53luminaA__GCST90003079	12	RNU4-54P	402	7.03985e-11	3.94454e-09	0.00512831	0.286639	0.708233
GCST90454345_pb53luminaA__GCST90003652	17	MAPK8IP1P2	627	1.99876e-09	0.0035577	1.62536e-07	0.288598	0.707844
GCST90454345_pb53luminaA__GCST90003652	17	RN7SL656P	596	1.00919e-08	0.0109441	2.60925e-07	0.282251	0.706804
GCST90454345_pb53luminaA__GCST90002807	17	RN7SL656P	596	1.75753e-07	0.0109868	4.54406e-06	0.283355	0.705653
ieu_a_1127__GCST90003079	17	KANSL1	483	1.96868e-21	0.00109231	5.35483e-19	0.296406	0.702502
GCST90454345_pb53luminaA__GCST90003652	17	RPS26P8	664	1.96138e-09	0.00359655	1.61993e-07	0.296344	0.700059
ieu_a_1127__GCST90003079	17	CRHR1-IT1	591	5.25876e-21	0.00135587	1.18632e-18	0.305178	0.693467
GCST90454345_pb53luminaA__GCST90003079	12	ENSG00000273989	621	7.15272e-11	2.79925e-09	0.00765565	0.298914	0.693431
GCST90454345_pb53luminaA__GCST90003180	17	RN7SL656P	597	8.05175e-15	0.0114477	2.08177e-13	0.295284	0.693268
ieu_a_1127__GCST90003079	17	CRHR1	602	5.09782e-21	0.00134749	1.17917e-18	0.311001	0.687652
ieu_a_1127__GCST90003079	17	RP11-105N13.4	602	5.09782e-21	0.00134749	1.17917e-18	0.311001	0.687652
ieu_a_1127__GCST90003079	17	Y_RNA	542	1.80092e-21	0.00106901	5.35631e-19	0.317266	0.681665
GCST90454345_pb53luminaA__GCST90003652	17	LINC02210	748	1.85274e-09	0.00372346	1.59105e-07	0.319077	0.6772
GCST90454345_pb53luminaA__GCST90003652	17	LINC02210-CRHR1	748	1.85274e-09	0.00372346	1.59105e-07	0.319077	0.6772
GCST90454345_pb53luminaA__GCST90003079	17	LRRC37A	753	7.05981e-21	0.00946842	2.41618e-19	0.323384	0.667148
GCST90454345_pb53luminaA__GCST90003652	17	LINC02210	815	1.7755e-09	0.00379947	1.57263e-07	0.335873	0.660327
GCST90454345_pb53luminaA__GCST90003079	17	ENSG00000289729	792	6.8388e-21	0.0094121	2.44764e-19	0.33621	0.654378
GCST90454345_pb53luminaA__GCST90003749	17	ENSG00000289729	792	5.97022e-06	0.00964311	0.000213678	0.344487	0.645651
ieu_a_1127__GCST90003079	17	KANSL1-AS1	659	1.53254e-21	0.00102001	5.35281e-19	0.355622	0.643358
GCST90454345_pb53luminaA__GCST90003652	17	LRRC37A	753	6.62328e-09	0.0103363	2.26678e-07	0.353118	0.636545
GCST90454345_pb53luminaA__GCST90003652	17	ENSG00000289729	792	6.19317e-09	0.0102342	2.21657e-07	0.365664	0.624102
GCST90454345_pb53luminaA__GCST90002807	17	LRRC37A	753	9.94844e-08	0.010693	3.40479e-06	0.365336	0.623968
GCST90454345_pb53luminaA__GCST90003180	17	LRRC37A	755	4.72236e-15	0.0108919	1.6181e-13	0.372592	0.616517
GCST90454345_pb53luminaA__GCST90003652	17	ENSG00000306349	1044	1.57077e-09	0.00396637	1.51915e-07	0.382988	0.613045
GCST90454345_pb53luminaA__GCST90003180	12	ENSG00000273989	622	2.33623e-10	3.44655e-09	0.0250397	0.368794	0.606166
GCST90454345_pb53luminaA__GCST90002807	17	ENSG00000289729	792	9.07043e-08	0.010755	3.24636e-06	0.384321	0.604921
GCST90454345_pb53luminaA__GCST90003180	17	ENSG00000289729	794	4.35341e-15	0.0109091	1.55986e-13	0.390284	0.598807
GCST90454345_pb53luminaA__GCST90003079	17	ENSG00000261575	909	5.91961e-21	0.00878555	2.67095e-19	0.395811	0.595403
GCST90454345_pb53luminaA__GCST90003079	17	ENSG00000305169	910	5.91981e-21	0.00878554	2.67104e-19	0.395812	0.595403
ieu_a_1127__GCST90003079	17	RNU7-101P	746	1.85474e-21	0.00107918	6.96131e-19	0.404449	0.594472
GCST90454345_pb53luminaA__GCST90003079	17	ENSG00000291018	912	5.90534e-21	0.00877213	2.67526e-19	0.396804	0.594424
GCST90454345_pb53luminaA__GCST90003749	17	ENSG00000261575	909	5.07241e-06	0.00886557	0.000228869	0.399426	0.591474
GCST90454345_pb53luminaA__GCST90003749	17	ENSG00000305169	910	5.07274e-06	0.00886557	0.000228884	0.399426	0.591474
GCST90454345_pb53luminaA__GCST90003180	12	RNU4-54P	403	4.50026e-10	5.1686e-09	0.0328498	0.376694	0.590457
GCST90454345_pb53luminaA__GCST90003749	17	ENSG00000291018	912	5.05223e-06	0.00885269	0.000228878	0.400457	0.590456
GCST90454345_pb53luminaA__GCST90003749	17	ENSG00000304996	552	5.38015e-06	0.00530459	0.000414552	0.408143	0.586132
GCST90454345_pb53luminaA__GCST90003079	17	ENSG00000262539	954	5.73992e-21	0.00863484	2.71723e-19	0.408183	0.583183
GCST90454345_pb53luminaA__GCST90003749	17	ENSG00000291175	558	5.25988e-06	0.00533243	0.000408214	0.413264	0.58099
GCST90454345_pb53luminaA__GCST90003749	17	DND1P1	564	5.25957e-06	0.00534378	0.000408017	0.413969	0.580274
ieu_a_1127__GCST90003079	17	RP11-293E1.2	1055	2.19763e-21	0.001081	8.53185e-19	0.419098	0.579821
ieu_a_1127__GCST90003079	17	RP11-293E1.1	1061	2.17378e-21	0.0010779	8.49023e-19	0.420421	0.578501
GCST90454345_pb53luminaA__GCST90003749	17	ENSG00000262539	954	4.84542e-06	0.00872889	0.000229378	0.41264	0.578397
finngen_R14_ERPLUS__lateralorbitofrontal_thickavg	5	Y_RNA	494	3.15e-05	3.41e-06	0.382	0.0407	0.578
GCST90454345_pb53luminaA__GCST90003749	17	ENSG00000285668	564	5.15475e-06	0.00536266	0.000402548	0.418209	0.576021
finngen_R19_ERPLUS__lateralorbitofrontal_thickavg	5	LINC02863	591	3.09047e-05	3.54115e-06	0.389996	0.044121	0.565848
GCST90454345_pb53luminaA__GCST90003652	17	ENSG00000261575	909	5.12907e-09	0.00943935	2.31425e-07	0.425341	0.565219
GCST90454345_pb53luminaA__GCST90003652	17	ENSG00000305169	910	5.12936e-09	0.00943935	2.31439e-07	0.425342	0.565219
GCST90454345_pb53luminaA__GCST90003652	17	ENSG00000291018	912	5.09908e-09	0.00942277	2.31e-07	0.42631	0.564267
finngen_R18_ERPLUS__lateralorbitofrontal_thickavg	5	CARINH	624	3.07788e-05	3.58719e-06	0.39123	0.0450332	0.563703
GCST90454345_pb53luminaA__GCST90003749	17	ENSG00000280022	587	4.87797e-06	0.00545085	0.000386776	0.431637	0.562521
finngen_R13_ERPLUS__lateralorbitofrontal_thickavg	5	MIR3936	631	3.07e-05	3.71e-06	0.392	0.0467	0.561
finngen_R17_ERPLUS__lateralorbitofrontal_thickavg	5	MIR3936HG	630	3.06849e-05	3.70964e-06	0.392752	0.0469214	0.560292
finngen_R16_ERPLUS__lateralorbitofrontal_thickavg	5	SLC22A5	630	3.07e-05	3.7e-06	0.393	0.0468	0.56
GCST90454345_pb53luminaA__GCST90003079	17	ENSG00000305150	1053	5.39314e-21	0.00829185	2.82861e-19	0.434336	0.557372
GCST90454345_pb53luminaA__GCST90003079	17	MAPK8IP1P1	1056	5.3821e-21	0.00828545	2.82867e-19	0.434902	0.556812
GCST90454345_pb53luminaA__GCST90003652	17	ENSG00000262539	954	4.72379e-09	0.00926529	2.2362e-07	0.438058	0.552676
GCST90454345_pb53luminaA__GCST90003749	17	ENSG00000305150	1053	4.35835e-06	0.00838968	0.000228588	0.439473	0.551905
GCST90454345_pb53luminaA__GCST90003749	17	MAPK8IP1P1	1056	4.34381e-06	0.00838411	0.000228298	0.440093	0.551291
GCST90454345_pb53luminaA__GCST90003079	17	ENSG00000305133	1081	5.29781e-21	0.00820622	2.85053e-19	0.440991	0.550803
ieu_a_1127__GCST90003079	17	RP11-669E14.6	1111	9.41057e-22	0.000944264	4.5215e-19	0.453145	0.545911
GCST90454345_pb53luminaA__GCST90003749	17	ENSG00000305133	1081	4.23392e-06	0.00830857	0.000227809	0.446504	0.544955
ieu_a_1127__GCST90003079	17	STH	1125	8.47216e-22	0.000948164	4.07373e-19	0.45537	0.543682
GCST90454345_pb53luminaA__GCST90003749	17	ENSG00000295828	624	4.50107e-06	0.00557434	0.000365181	0.451716	0.54234
GCST90454345_pb53luminaA__GCST90002807	17	ENSG00000261575	909	6.55243e-08	0.0099582	2.95648e-06	0.448776	0.541263
GCST90454345_pb53luminaA__GCST90002807	17	ENSG00000305169	910	6.55279e-08	0.00995827	2.95664e-06	0.448779	0.541259
ieu_a_1127__GCST90003079	17	SPPL2C	1191	9.81636e-22	0.000952434	4.72599e-19	0.457999	0.541049
GCST90454345_pb53luminaA__GCST90003749	17	MAPK8IP1P2	627	4.46575e-06	0.00558283	0.000363147	0.453446	0.540604
GCST90454345_pb53luminaA__GCST90002807	17	ENSG00000291018	912	6.51172e-08	0.0099383	2.94996e-06	0.449688	0.540371
GCST90454345_pb53luminaA__GCST90003180	17	ENSG00000261575	911	3.26947e-15	0.0100462	1.47651e-13	0.453156	0.536798
GCST90454345_pb53luminaA__GCST90003180	17	ENSG00000305169	912	3.26961e-15	0.0100462	1.47658e-13	0.453157	0.536797
GCST90454345_pb53luminaA__GCST90003180	17	ENSG00000291018	914	3.25273e-15	0.0100262	1.47488e-13	0.454079	0.535895
GCST90454345_pb53luminaA__GCST90003079	17	KANSL1	1152	5.0333e-21	0.00806552	2.85912e-19	0.457619	0.534315
GCST90454345_pb53luminaA__GCST90003749	17	RPS26P8	664	4.24958e-06	0.00562957	0.000350979	0.464425	0.52959
GCST90454345_pb53luminaA__GCST90003180	17	SPPL2C	1214	1.57621e-15	0.0122939	5.88283e-14	0.458311	0.529395
GCST90454345_pb53luminaA__GCST90002807	17	ENSG00000262539	954	6.09761e-08	0.0097671	2.88656e-06	0.461838	0.528392
GCST90454345_pb53luminaA__GCST90003652	17	ENSG00000305150	1053	4.13997e-09	0.00883607	2.17134e-07	0.462909	0.528255
GCST90454345_pb53luminaA__GCST90003652	17	MAPK8IP1P1	1056	4.12593e-09	0.00882865	2.16847e-07	0.46348	0.527691
GCST90454345_pb53luminaA__GCST90003652	17	SPPL2C	1213	5.74917e-09	0.0123661	2.14574e-07	0.461008	0.526626
GCST90454345_pb53luminaA__GCST90002807	17	SPPL2C	1213	2.8193e-08	0.0123679	1.05224e-06	0.461075	0.526556
ieu_a_1127__GCST90003079	17	MAPT	1214	8.02041e-22	0.000913767	4.16334e-19	0.473805	0.525281
GCST90454345_pb53luminaA__GCST90003749	17	KANSL1	1152	3.88473e-06	0.00822248	0.000220668	0.466544	0.525009
ieu_a_1127__GCST90003079	17	MAPT-AS1	1221	7.96025e-22	0.00091231	4.14476e-19	0.474498	0.524589
GCST90454345_pb53luminaA__GCST90003180	17	ENSG00000262539	956	3.08206e-15	0.00984416	1.46026e-13	0.465887	0.524269
GCST90454345_pb53luminaA__GCST90003180	17	ENSG00000303296	1208	1.57485e-15	0.0122878	5.94945e-14	0.463684	0.524029
GCST90454345_pb53luminaA__GCST90003749	17	SPPL2C	1213	5.12134e-06	0.0124306	0.000191142	0.463419	0.523955
GCST90454345_pb53luminaA__GCST90003079	17	Y_RNA	1212	4.85716e-21	0.00800047	2.84682e-19	0.468389	0.52361
GCST90454345_pb53luminaA__GCST90003652	17	ENSG00000305133	1081	3.95844e-09	0.00870448	2.12987e-07	0.467828	0.523468
GCST90454345_pb53luminaA__GCST90003180	17	ENSG00000303280	1219	1.54824e-15	0.0122263	5.902e-14	0.465553	0.522221
GCST90454345_pb53luminaA__GCST90002807	17	ENSG00000303296	1207	2.78316e-08	0.0123606	1.05142e-06	0.466434	0.521204
GCST90454345_pb53luminaA__GCST90003180	17	CRHR1	1242	1.54723e-15	0.0119908	6.03078e-14	0.466856	0.521154
GCST90454345_pb53luminaA__GCST90003749	17	CRHR1	1240	4.65585e-06	0.0120002	0.000181275	0.466704	0.52111
GCST90454345_pb53luminaA__GCST90003652	17	ENSG00000303296	1207	5.45082e-09	0.0123681	2.0592e-07	0.466718	0.520913
GCST90454345_pb53luminaA__GCST90002807	17	CRHR1	1240	2.9272e-08	0.0120103	1.1397e-06	0.467099	0.520889
GCST90454345_pb53luminaA__GCST90002807	17	ENSG00000303280	1218	2.74389e-08	0.0122989	1.04599e-06	0.468325	0.519375
GCST90454345_pb53luminaA__GCST90003652	17	ENSG00000303280	1218	5.40148e-09	0.0123083	2.05909e-07	0.468683	0.519008
GCST90454345_pb53luminaA__GCST90003749	17	ENSG00000303296	1207	5.00952e-06	0.0124401	0.000189248	0.469441	0.517924
GCST90454345_pb53luminaA__GCST90003180	17	ENSG00000262372	1181	1.88286e-15	0.0118091	7.52342e-14	0.471346	0.516845
GCST90454345_pb53luminaA__GCST90003079	17	CRHR1	1240	1.45927e-20	0.0121262	5.68165e-19	0.471615	0.516259
GCST90454345_pb53luminaA__GCST90003749	17	ENSG00000303280	1218	4.93429e-06	0.0123761	0.000188099	0.47127	0.51616
GCST90454345_pb53luminaA__GCST90003079	17	ENSG00000303296	1207	1.14465e-20	0.0125303	4.32425e-19	0.472852	0.514618
GCST90454345_pb53luminaA__GCST90003079	17	ENSG00000265547	1101	2.01703e-20	0.0112024	8.55884e-19	0.474837	0.51396
GCST90454345_pb53luminaA__GCST90002807	17	ENSG00000262372	1179	2.99338e-08	0.0118896	1.19511e-06	0.47418	0.513929
GCST90454345_pb53luminaA__GCST90003079	17	ENSG00000262372	1179	1.04377e-20	0.0118989	4.16727e-19	0.474551	0.51355
GCST90454345_pb53luminaA__GCST90003652	17	CRHR1	1240	5.33732e-09	0.0121964	2.07808e-07	0.47435	0.513453
GCST90454345_pb53luminaA__GCST90003079	17	ENSG00000303280	1218	1.13253e-20	0.0124669	4.31728e-19	0.474734	0.512799
GCST90454345_pb53luminaA__GCST90003749	17	Y_RNA	1212	3.67492e-06	0.00819285	0.00021539	0.479677	0.511911
GCST90454345_pb53luminaA__GCST90003652	17	ENSG00000262372	1179	4.61205e-09	0.0119495	1.84137e-07	0.476573	0.511478
GCST90454345_pb53luminaA__GCST90003180	17	STH	1197	1.68007e-15	0.0116215	6.904e-14	0.477055	0.511323
ieu_a_1127__GCST90003079	17	RP11-669E14.4	1263	7.2411e-22	0.000886982	3.98686e-19	0.48785	0.511263
GCST90454345_pb53luminaA__GCST90003749	17	ENSG00000262372	1179	5.05808e-06	0.0119651	0.000201945	0.477196	0.510632
GCST90454345_pb53luminaA__GCST90003180	17	MAPT	1249	1.52261e-15	0.0118137	6.16954e-14	0.478173	0.510013
GCST90454345_pb53luminaA__GCST90003652	17	STH	1195	4.67866e-09	0.0116724	1.92112e-07	0.478774	0.509553
GCST90454345_pb53luminaA__GCST90002807	17	STH	1195	2.73555e-08	0.0116784	1.12325e-06	0.479019	0.509301
GCST90454345_pb53luminaA__GCST90003749	17	ENSG00000265547	1101	4.84461e-06	0.011323	0.000205571	0.47996	0.508506
GCST90454345_pb53luminaA__GCST90003180	17	MAPT-AS1	1256	1.51032e-15	0.0117722	6.16262e-14	0.479835	0.508393
GCST90454345_pb53luminaA__GCST90003180	17	MAPT-IT1	1258	1.50819e-15	0.0117646	6.1614e-14	0.480111	0.508124
GCST90454345_pb53luminaA__GCST90003749	17	STH	1195	4.85333e-06	0.0117055	0.000199284	0.480135	0.507955
GCST90454345_pb53luminaA__GCST90003079	17	STH	1195	9.34297e-21	0.0117137	3.83634e-19	0.480473	0.507813
GCST90454345_pb53luminaA__GCST90003652	17	MAPT	1248	4.91707e-09	0.0118694	1.99237e-07	0.480433	0.507697
GCST90454345_pb53luminaA__GCST90002807	17	MAPT	1248	2.62404e-08	0.0118732	1.06325e-06	0.480586	0.50754
GCST90454345_pb53luminaA__GCST90002807	17	ENSG00000265547	1101	3.35312e-08	0.011355	1.42283e-06	0.481317	0.507327
GCST90454345_pb53luminaA__GCST90003180	17	ENSG00000265547	1103	1.72661e-15	0.0113599	7.33395e-14	0.482018	0.506622
GCST90454345_pb53luminaA__GCST90003652	17	MAPT-AS1	1255	4.85593e-09	0.0118228	1.98138e-07	0.481903	0.506274
GCST90454345_pb53luminaA__GCST90003652	17	MAPT-IT1	1257	4.84743e-09	0.0118149	1.98032e-07	0.482165	0.50602
GCST90454345_pb53luminaA__GCST90002807	17	MAPT-AS1	1255	2.59979e-08	0.0118296	1.0608e-06	0.482181	0.505988
GCST90454345_pb53luminaA__GCST90002807	17	MAPT-IT1	1257	2.59601e-08	0.0118219	1.06054e-06	0.482454	0.505723
GCST90454345_pb53luminaA__GCST90003079	17	KANSL1-AS1	1320	4.56921e-21	0.00789281	2.81868e-19	0.48639	0.505717
GCST90454345_pb53luminaA__GCST90003749	17	MAPT	1248	4.53169e-06	0.011921	0.000183622	0.482526	0.505365
GCST90454345_pb53luminaA__GCST90003652	17	KANSL1	1152	3.58021e-09	0.00858668	2.0337e-07	0.487254	0.504159
GCST90454345_pb53luminaA__GCST90003749	17	MAPT-AS1	1255	4.49343e-06	0.0118785	0.000183346	0.484178	0.503756
GCST90454345_pb53luminaA__GCST90003749	17	LINC02210	748	3.755e-06	0.00571576	0.000322463	0.49034	0.503618
GCST90454345_pb53luminaA__GCST90003749	17	LINC02210-CRHR1	748	3.755e-06	0.00571576	0.000322463	0.49034	0.503618
GCST90454345_pb53luminaA__GCST90003749	17	MAPT-IT1	1257	4.48553e-06	0.0118704	0.000183247	0.484437	0.503504
GCST90454345_pb53luminaA__GCST90002807	17	ENSG00000305150	1053	5.27276e-08	0.0092994	2.76548e-06	0.487234	0.503463
GCST90454345_pb53luminaA__GCST90003079	17	MAPT	1248	9.6742e-21	0.0119804	3.91993e-19	0.484937	0.503083
GCST90454345_pb53luminaA__GCST90002807	17	MAPK8IP1P1	1056	5.24538e-08	0.00928993	2.75682e-06	0.487749	0.502959
GCST90454345_pb53luminaA__GCST90003079	17	MAPT-AS1	1255	9.54027e-21	0.0119302	3.89274e-19	0.486289	0.501781
GCST90454345_pb53luminaA__GCST90003079	17	MAPT-IT1	1257	9.52402e-21	0.011922	3.89084e-19	0.486548	0.50153
GCST90454345_pb53luminaA__GCST90003180	17	ENSG00000305150	1055	2.71424e-15	0.0093631	1.42467e-13	0.490956	0.49968
GCST90454345_pb53luminaA__GCST90003180	17	MAPK8IP1P1	1058	2.70212e-15	0.00935328	1.42124e-13	0.491459	0.499188
GCST90454345_pb53luminaA__GCST90002807	17	ENSG00000305133	1081	5.06194e-08	0.00918504	2.72362e-06	0.493711	0.497101
GCST90454345_pb53luminaA__GCST90003180	17	Metazoa_SRP	1284	1.39648e-15	0.0114247	6.02406e-14	0.492336	0.496239
GCST90454345_pb53luminaA__GCST90003180	17	ENSG00000262881	1297	1.39327e-15	0.01141	6.02427e-14	0.492853	0.495737
GCST90454345_pb53luminaA__GCST90002807	17	Metazoa_SRP	1283	2.37152e-08	0.0114734	1.02301e-06	0.494436	0.494089
GCST90454345_pb53luminaA__GCST90003652	17	Metazoa_SRP	1283	4.48713e-09	0.0114756	1.93563e-07	0.494533	0.493991
GCST90454345_pb53luminaA__GCST90003652	17	ENSG00000262881	1296	4.44936e-09	0.0114531	1.92383e-07	0.494717	0.49383
GCST90454345_pb53luminaA__GCST90003180	17	ENSG00000305133	1083	2.62296e-15	0.00924586	1.41236e-13	0.49736	0.493394
finngen_R12_ERPLUS__lateralorbitofrontal_thickavg	5	SLC22A4	647	7.53e-05	3.25e-06	0.487	0.0205	0.493
GCST90454345_pb53luminaA__GCST90002807	17	ENSG00000262881	1296	2.38556e-08	0.0114729	1.03147e-06	0.495576	0.49295
GCST90454345_pb53luminaA__GCST90003749	17	Metazoa_SRP	1283	4.34977e-06	0.0115244	0.000187638	0.496641	0.491643
GCST90454345_pb53luminaA__GCST90003749	17	ENSG00000262881	1296	4.16809e-06	0.0115071	0.000180221	0.497056	0.491253
GCST90454345_pb53luminaA__GCST90003749	17	KANSL1-AS1	1320	3.35641e-06	0.0081291	0.000207052	0.500981	0.490679
GCST90454345_pb53luminaA__GCST90003652	17	Y_RNA	1212	3.34781e-09	0.00855532	1.96217e-07	0.500942	0.490502
GCST90454345_pb53luminaA__GCST90003079	17	Metazoa_SRP	1283	8.37084e-21	0.0115596	3.61096e-19	0.498162	0.490278
GCST90454345_pb53luminaA__GCST90003079	17	ENSG00000262881	1296	8.69506e-21	0.0115402	3.75959e-19	0.49849	0.48997
GCST90454345_pb53luminaA__GCST90003749	17	LINC02210	815	3.42049e-06	0.00575638	0.000302967	0.50938	0.484557
GCST90454345_pb53luminaA__GCST90002807	17	KANSL1	1152	4.40069e-08	0.00907233	2.49977e-06	0.514869	0.476057
GCST90454345_pb53luminaA__GCST90003180	17	KANSL1	1153	2.32482e-15	0.00910428	1.32153e-13	0.517052	0.473843
GCST90454345_pb53luminaA__GCST90003652	17	KANSL1-AS1	1320	3.03441e-09	0.00845566	1.87188e-07	0.521147	0.470397
GCST90454345_pb53luminaA__GCST90002807	17	Y_RNA	1212	4.00687e-08	0.00903646	2.34846e-06	0.529171	0.46179
GCST90454345_pb53luminaA__GCST90003180	17	Y_RNA	1213	2.14727e-15	0.00904527	1.25939e-13	0.530053	0.460902
GCST90454345_pb53luminaA__GCST90003652	17	ENSG00000265547	1101	5.13929e-09	0.0127116	2.18075e-07	0.538942	0.448346
GCST90454345_pb53luminaA__GCST90003079	17	ENSG00000304996	552	4.35526e-20	0.00712431	3.35582e-18	0.548499	0.444377
GCST90454345_pb53luminaA__GCST90002807	17	ENSG00000304996	552	6.62155e-08	0.00713766	5.10205e-06	0.549529	0.443328
GCST90454345_pb53luminaA__GCST90003180	17	KANSL1-AS1	1321	1.89587e-15	0.00891902	1.1703e-13	0.55012	0.440961
GCST90454345_pb53luminaA__GCST90002807	17	KANSL1-AS1	1320	3.43955e-08	0.00894545	2.12181e-06	0.551392	0.439661
GCST90454345_pb53luminaA__GCST90003079	17	DND1P1	564	4.16912e-20	0.00713929	3.23424e-18	0.553398	0.439463
GCST90454345_pb53luminaA__GCST90003079	17	ENSG00000291175	558	4.15363e-20	0.00714083	3.2236e-18	0.553754	0.439105
GCST90454345_pb53luminaA__GCST90002807	17	DND1P1	564	6.34701e-08	0.00714985	4.92376e-06	0.554218	0.438627
GCST90454345_pb53luminaA__GCST90002807	17	ENSG00000291175	558	6.32554e-08	0.00715035	4.90919e-06	0.554494	0.438351
GCST90454345_pb53luminaA__GCST90003749	17	ENSG00000306349	1044	2.64688e-06	0.00577018	0.000255989	0.557617	0.436354
GCST90454345_pb53luminaA__GCST90003079	17	ENSG00000285668	564	3.99873e-20	0.00715104	3.12272e-18	0.558009	0.43484
GCST90454345_pb53luminaA__GCST90002807	17	ENSG00000285668	564	6.09574e-08	0.00715739	4.76034e-06	0.558506	0.434332
GCST90454345_pb53luminaA__GCST90003079	17	ENSG00000280022	587	3.56558e-20	0.00719107	2.82716e-18	0.569759	0.42305
GCST90454345_pb53luminaA__GCST90002807	17	ENSG00000280022	587	5.52481e-08	0.00719785	4.38064e-06	0.570297	0.4225
GCST90454345_pb53luminaA__GCST90003180	17	ENSG00000304996	552	3.67745e-15	0.00749303	2.83355e-13	0.576939	0.415568
GCST90454345_pb53luminaA__GCST90003180	17	DND1P1	564	3.50842e-15	0.007493	2.7217e-13	0.580865	0.411642
GCST90454345_pb53luminaA__GCST90003180	17	ENSG00000291175	558	3.49467e-15	0.00749328	2.71218e-13	0.581135	0.411372
GCST90454345_pb53luminaA__GCST90003079	17	ENSG00000295828	624	3.0949e-20	0.00720641	2.51096e-18	0.584263	0.408531
GCST90454345_pb53luminaA__GCST90003079	17	ENSG00000295828	624	3.0949e-20	0.00720641	2.51096e-18	0.584263	0.408531
GCST90454345_pb53luminaA__GCST90003180	17	ENSG00000285668	564	3.3472e-15	0.00749227	2.61392e-13	0.584684	0.407823
GCST90454345_pb53luminaA__GCST90002807	17	ENSG00000295828	624	4.96645e-08	0.00721619	4.02939e-06	0.585058	0.407722
GCST90454345_pb53luminaA__GCST90003079	17	MAPK8IP1P2	627	3.05557e-20	0.00720319	2.48474e-18	0.585344	0.407453
GCST90454345_pb53luminaA__GCST90002807	17	MAPK8IP1P2	627	4.90814e-08	0.00721261	3.99121e-06	0.58611	0.406673
GCST90454345_pb53luminaA__GCST90002807	17	RPS26P8	664	4.47349e-08	0.00718884	3.69472e-06	0.593337	0.39947
GCST90454345_pb53luminaA__GCST90003079	17	RPS26P8	664	2.68909e-20	0.00719659	2.22096e-18	0.593978	0.398826
GCST90454345_pb53luminaA__GCST90003180	17	ENSG00000280022	587	2.95884e-15	0.00752616	2.34607e-13	0.596355	0.396118
GCST90454345_pb53luminaA__GCST90002807	17	LINC02210	748	3.69337e-08	0.00708649	3.1717e-06	0.608171	0.384739
GCST90454345_pb53luminaA__GCST90002807	17	LINC02210-CRHR1	748	3.69337e-08	0.00708649	3.1717e-06	0.608171	0.384739
GCST90454345_pb53luminaA__GCST90003079	17	LINC02210	748	2.21998e-20	0.00708696	1.90642e-18	0.608211	0.384702
GCST90454345_pb53luminaA__GCST90003079	17	LINC02210-CRHR1	748	2.21998e-20	0.00708696	1.90642e-18	0.608211	0.384702
GCST90454345_pb53luminaA__GCST90003180	17	ENSG00000295828	625	2.5704e-15	0.00751778	2.08653e-13	0.609875	0.382607
GCST90454345_pb53luminaA__GCST90003180	17	MAPK8IP1P2	628	2.53668e-15	0.00751082	2.06388e-13	0.610709	0.38178
GCST90454345_pb53luminaA__GCST90003180	17	RPS26P8	665	2.30379e-15	0.00745911	1.90372e-13	0.616004	0.376537
GCST90454345_pb53luminaA__GCST90003079	17	LINC02210	815	1.96443e-20	0.00699392	1.73997e-18	0.619106	0.373901
GCST90454345_pb53luminaA__GCST90002807	17	LINC02210	815	3.24274e-08	0.00699592	2.87222e-06	0.619282	0.373719
GCST90454345_pb53luminaA__GCST90003180	17	LINC02210	749	1.89426e-15	0.00730754	1.62752e-13	0.627489	0.365204
GCST90454345_pb53luminaA__GCST90003180	17	LINC02210-CRHR1	749	1.89426e-15	0.00730754	1.62752e-13	0.627489	0.365204
GCST90454345_pb53luminaA__GCST90003180	17	LINC02210	816	1.66751e-15	0.00718572	1.4777e-13	0.636421	0.356393
GCST90454345_pb53luminaA__GCST90003079	17	ENSG00000306349	1044	1.4265e-20	0.00668466	1.37962e-18	0.64615	0.347166
GCST90454345_pb53luminaA__GCST90002807	17	ENSG00000306349	1044	2.30758e-08	0.00670334	2.23174e-06	0.647958	0.345336
GCST90454345_pb53luminaA__GCST90003180	17	ENSG00000306349	1045	1.19917e-15	0.00683009	1.16028e-13	0.660523	0.332646
finngen_R15_ERPLUS__lateralorbitofrontal_thickavg	5	IRF1	99000000	0.00175	0.000153	0.731	0.0639	0.204
finngen_R12_BC__GCST90003408	11	DNAJB6P5	1028	2.78e-09	4.64e-09	0.369	0.616	0.0143
finngen_R12_BC__GCST90003408	11	LTO1	964	4.7e-11	1.93e-10	0.194	0.798	0.00806
finngen_R12_BC__GCST90003408	11	FGF19	977	4.7e-11	1.93e-10	0.194	0.798	0.00805
finngen_R12_BC__GCST90003408	11	CCND1	899	7.6e-38	3.14e-37	0.194	0.803	0.00289

## Sheet: Supplementary table 5
Supplementary table 5. Summary of enrichment results
Category	Term	Description	LogP
GO Molecular Functions	GO:0019904	protein domain specific binding	-4.60752
GO Molecular Functions	GO:0030165	PDZ domain binding	-4.19091
GO Biological Processes	GO:0061025	membrane fusion	-3.25816
GO Cellular Components	GO:0005774	vacuolar membrane	-2.93796
GO Cellular Components	GO:0005765	lysosomal membrane	-2.05836
GO Cellular Components	GO:0098852	lytic vacuole membrane	-2.05836
GO Biological Processes	GO:0051259	protein complex oligomerization	-2.68615
GO Biological Processes	GO:0031346	positive regulation of cell projection organization	-2.33361
GO Biological Processes	GO:0051960	regulation of nervous system development	-2.04818
GO Cellular Components	GO:0099572	postsynaptic specialization	-2.26965
GO Cellular Components	GO:0098794	postsynapse	-2.25992
GO Biological Processes	GO:0051051	negative regulation of transport	-2.04312
GO Biological Processes	GO:0048732	gland development	-2.14077
